# Supplementary material for: The SNP-Based Profiling of Montecristo Feral Goat Populations Reveals a History of Isolation, Bottlenecks, and the Effects of Management
Source: MDPI journal article supplement (doi:10.3390/genes13020213), 2022-01-24

# Chromosome 1

IDs

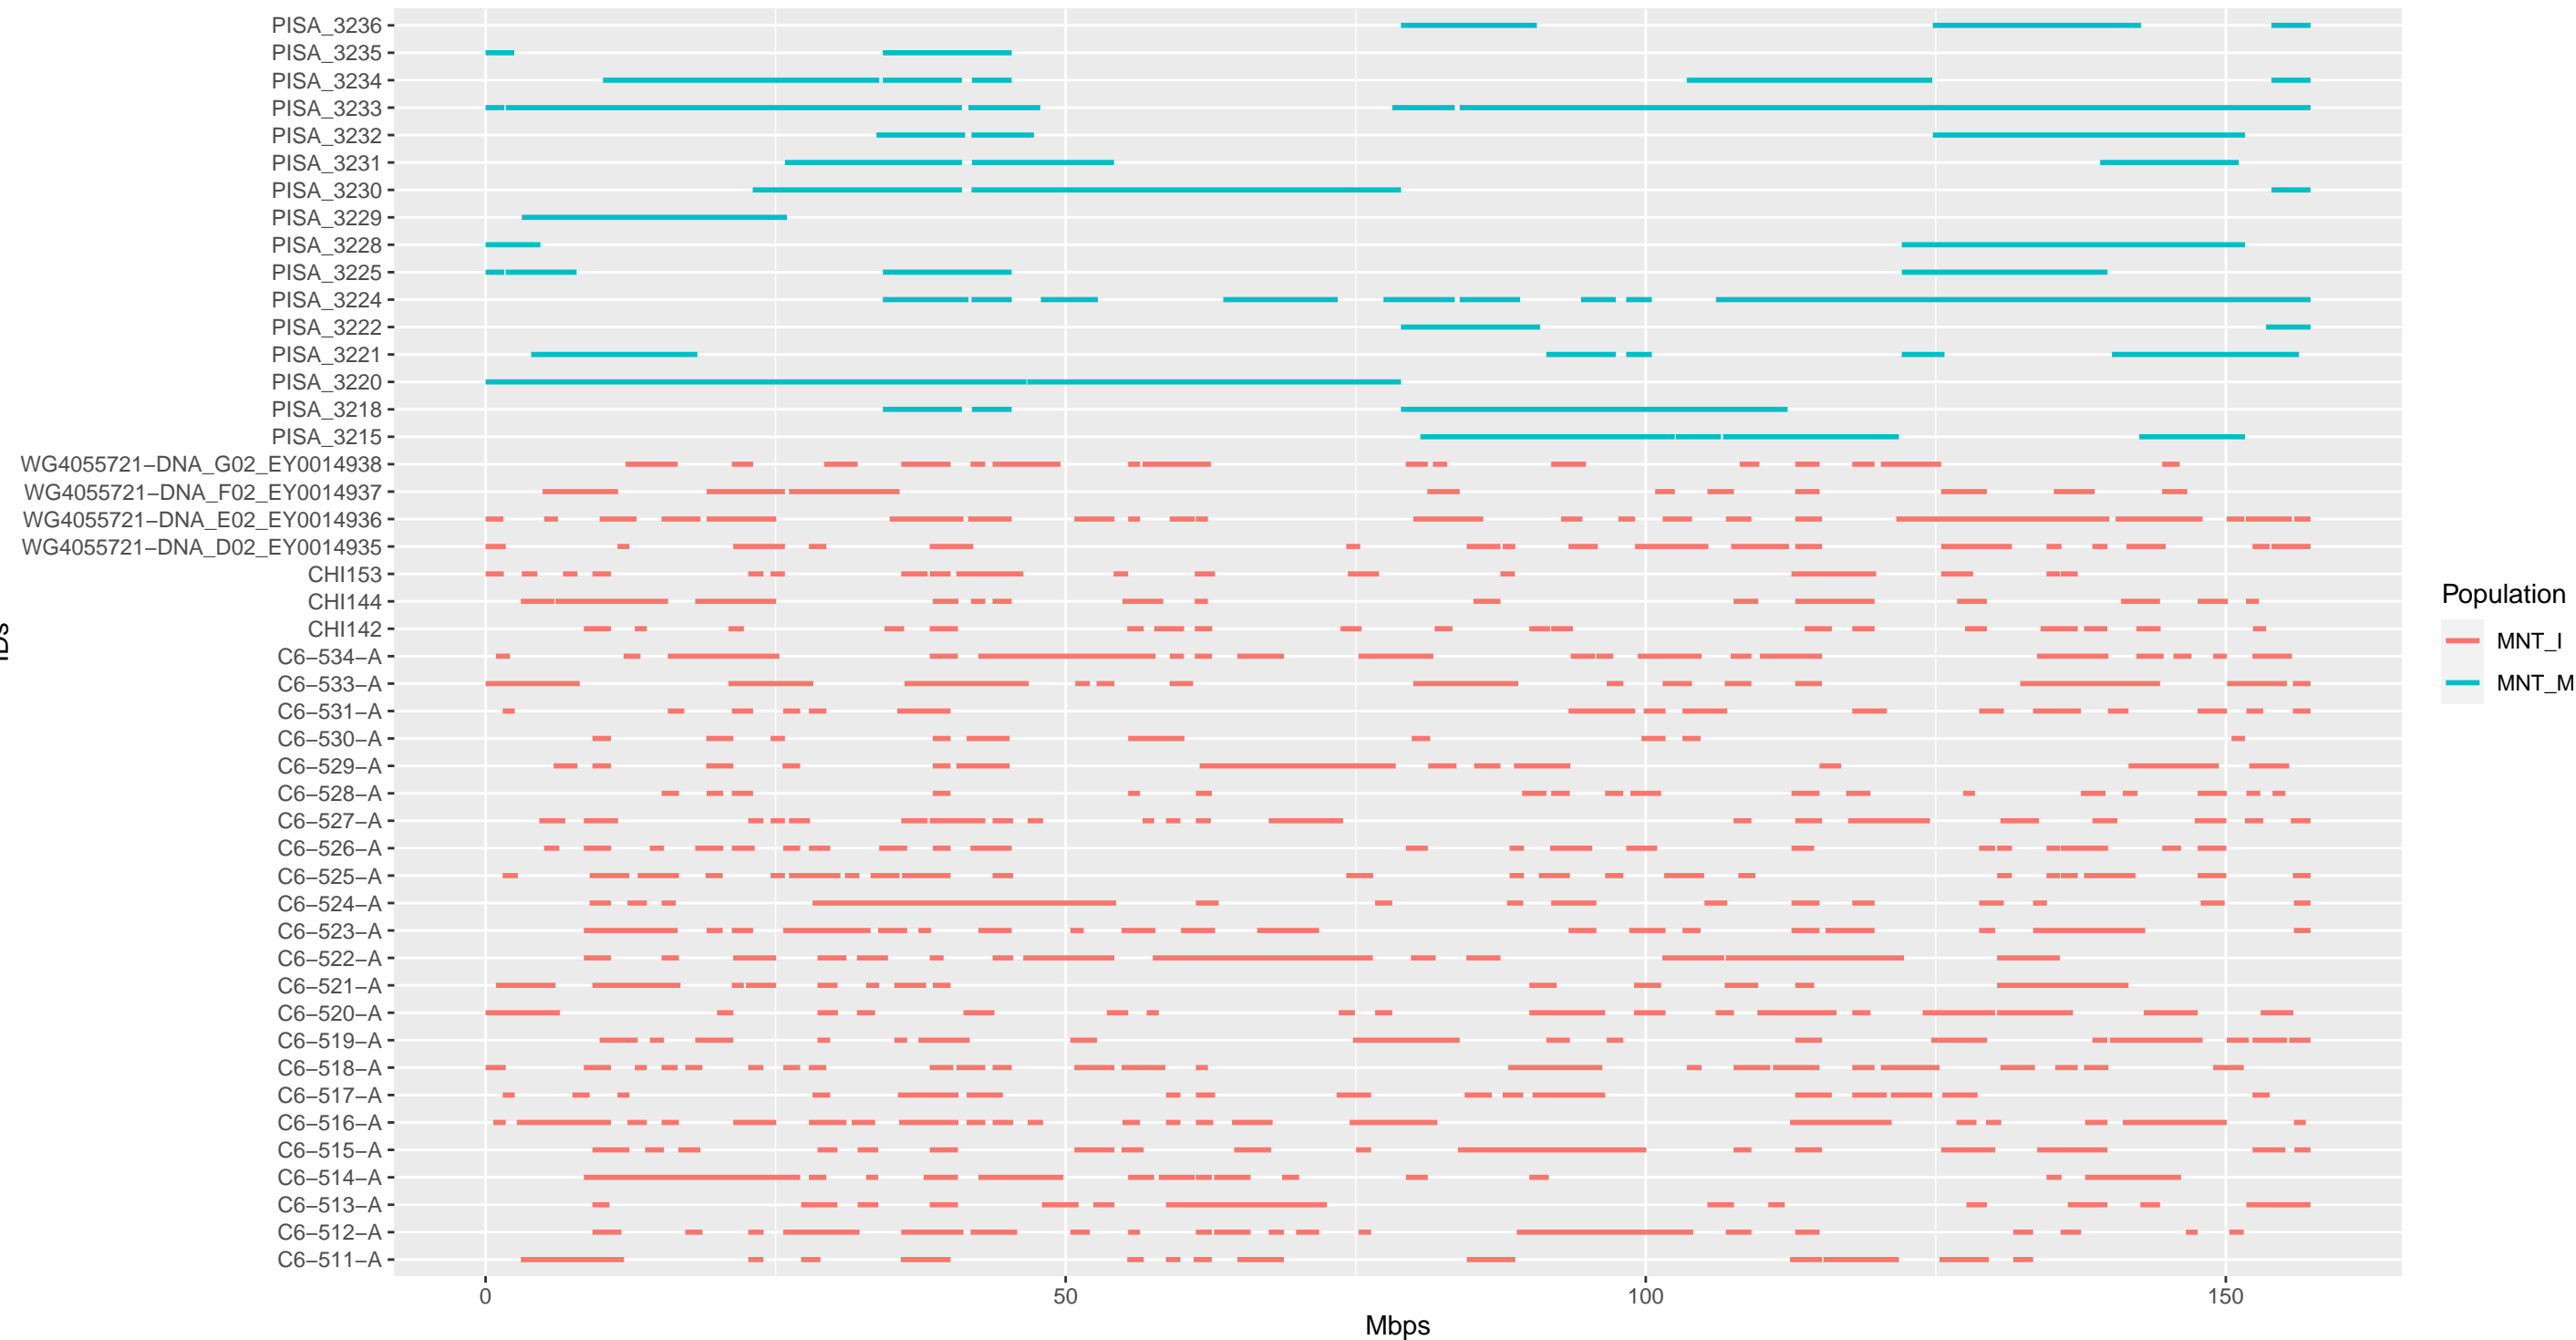

# Chromosome 2

IDs

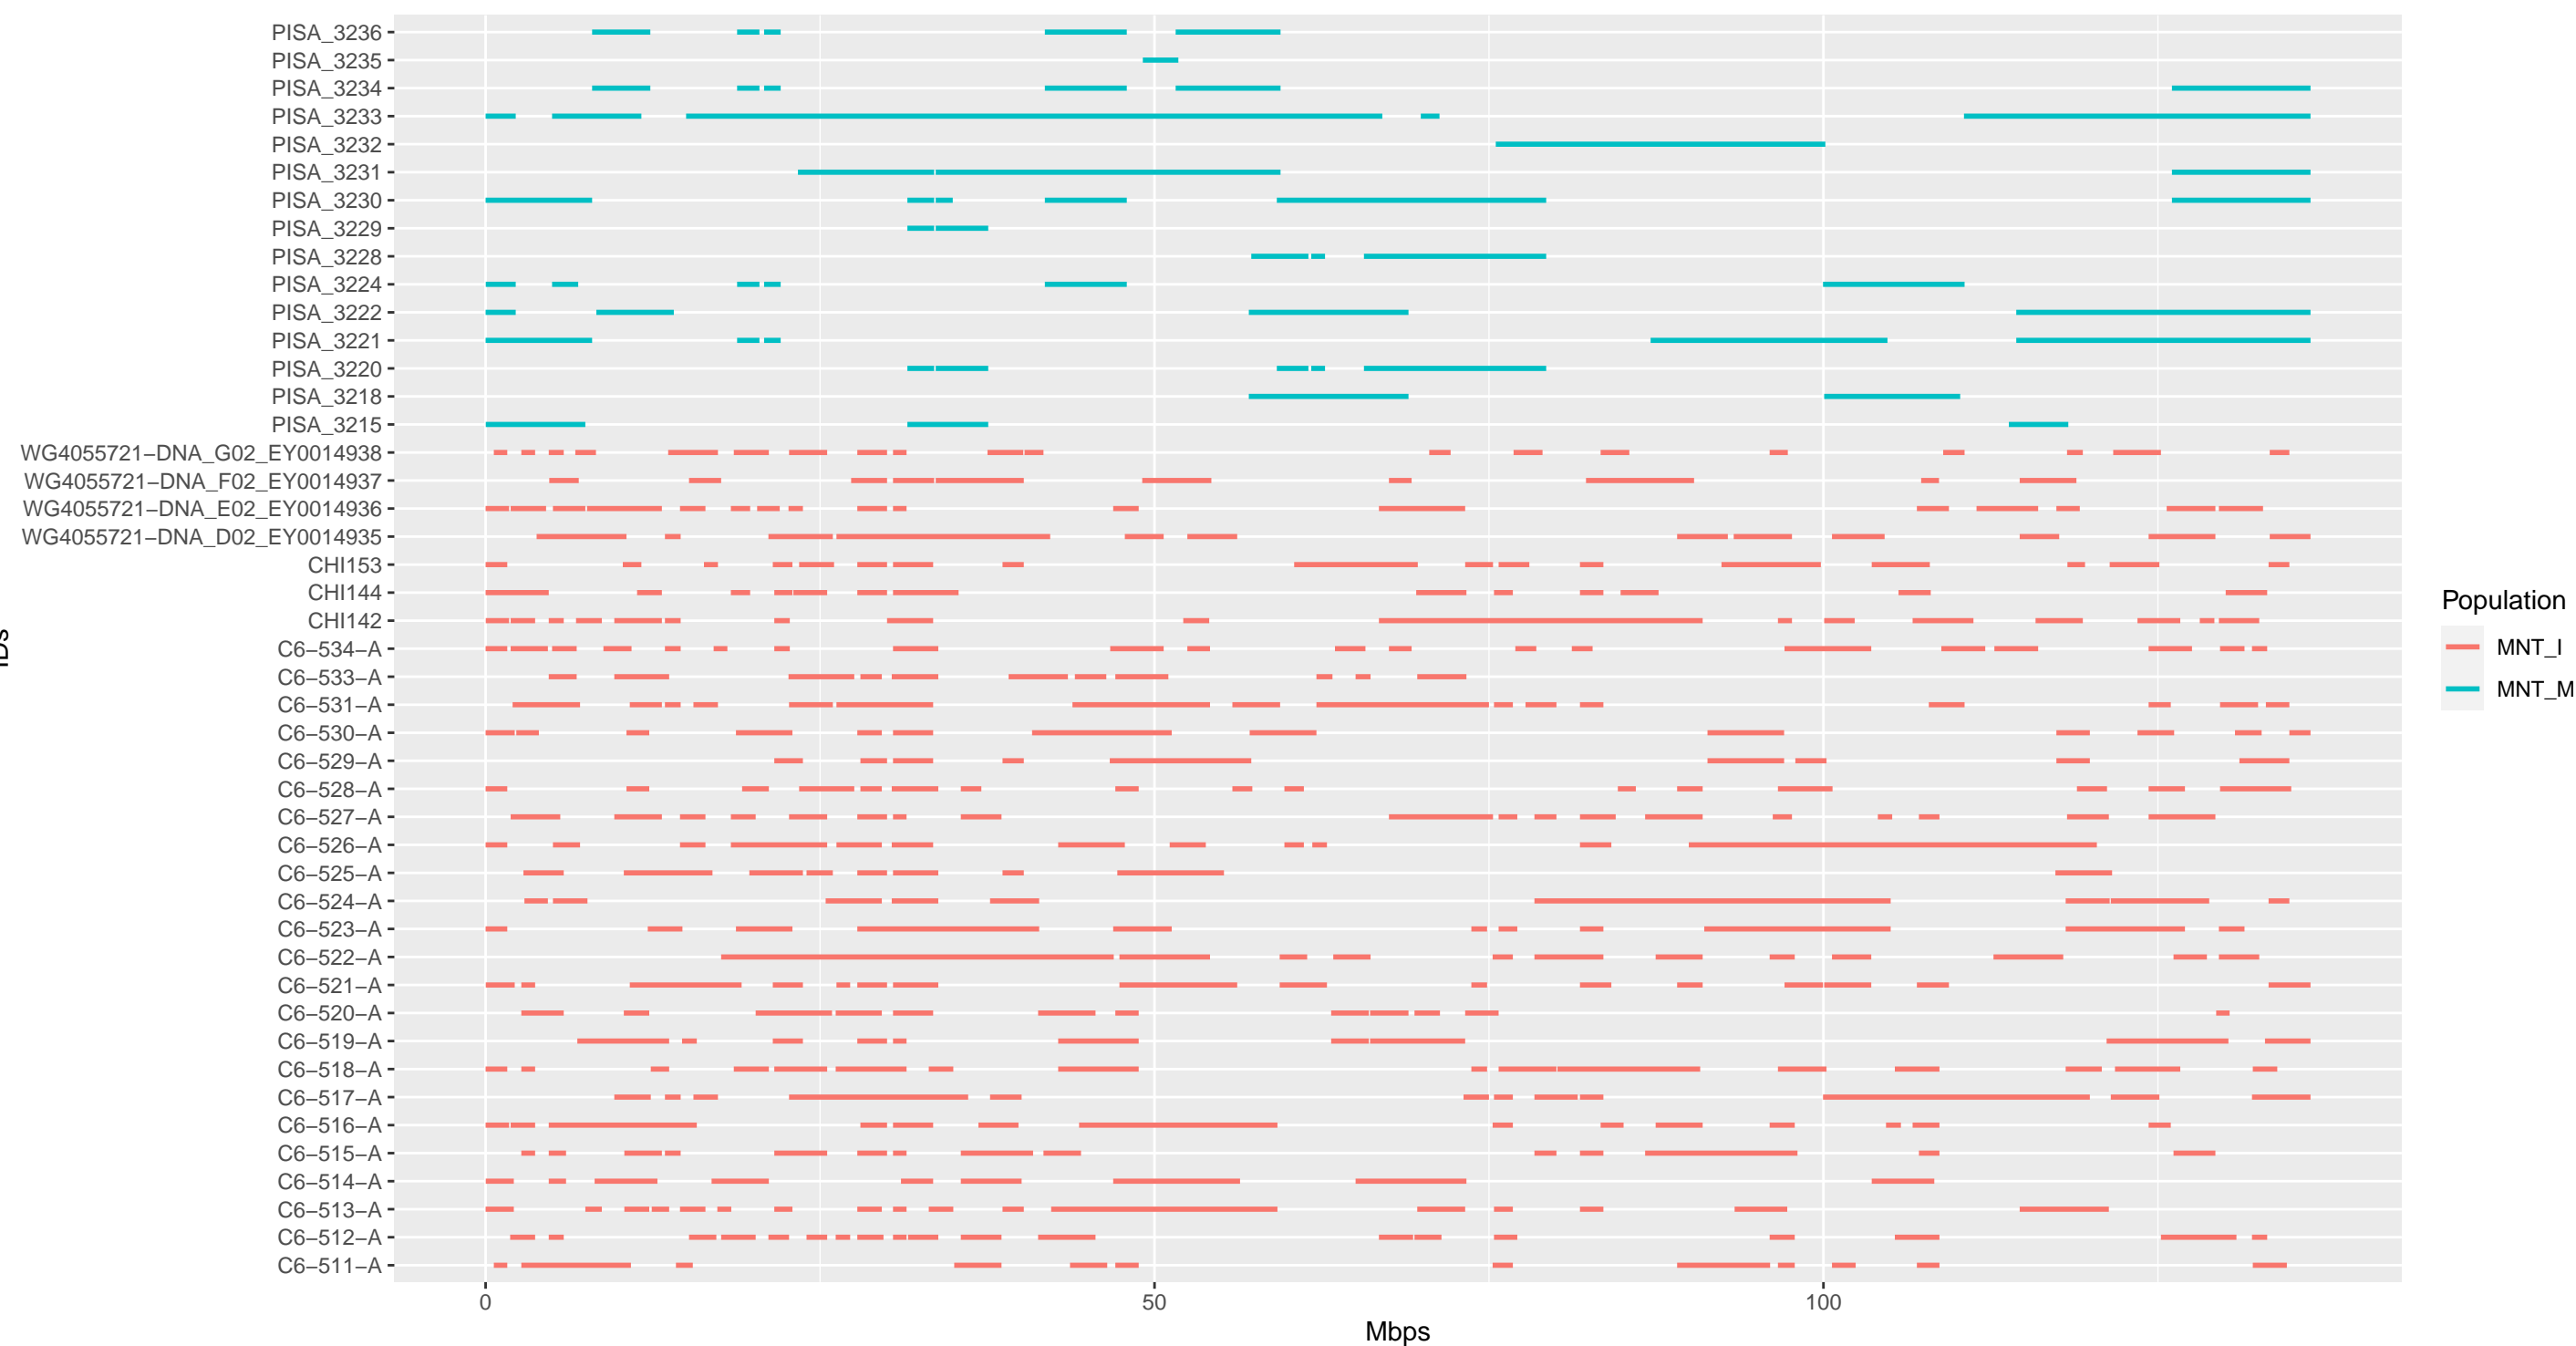

# Chromosome 3

IDs

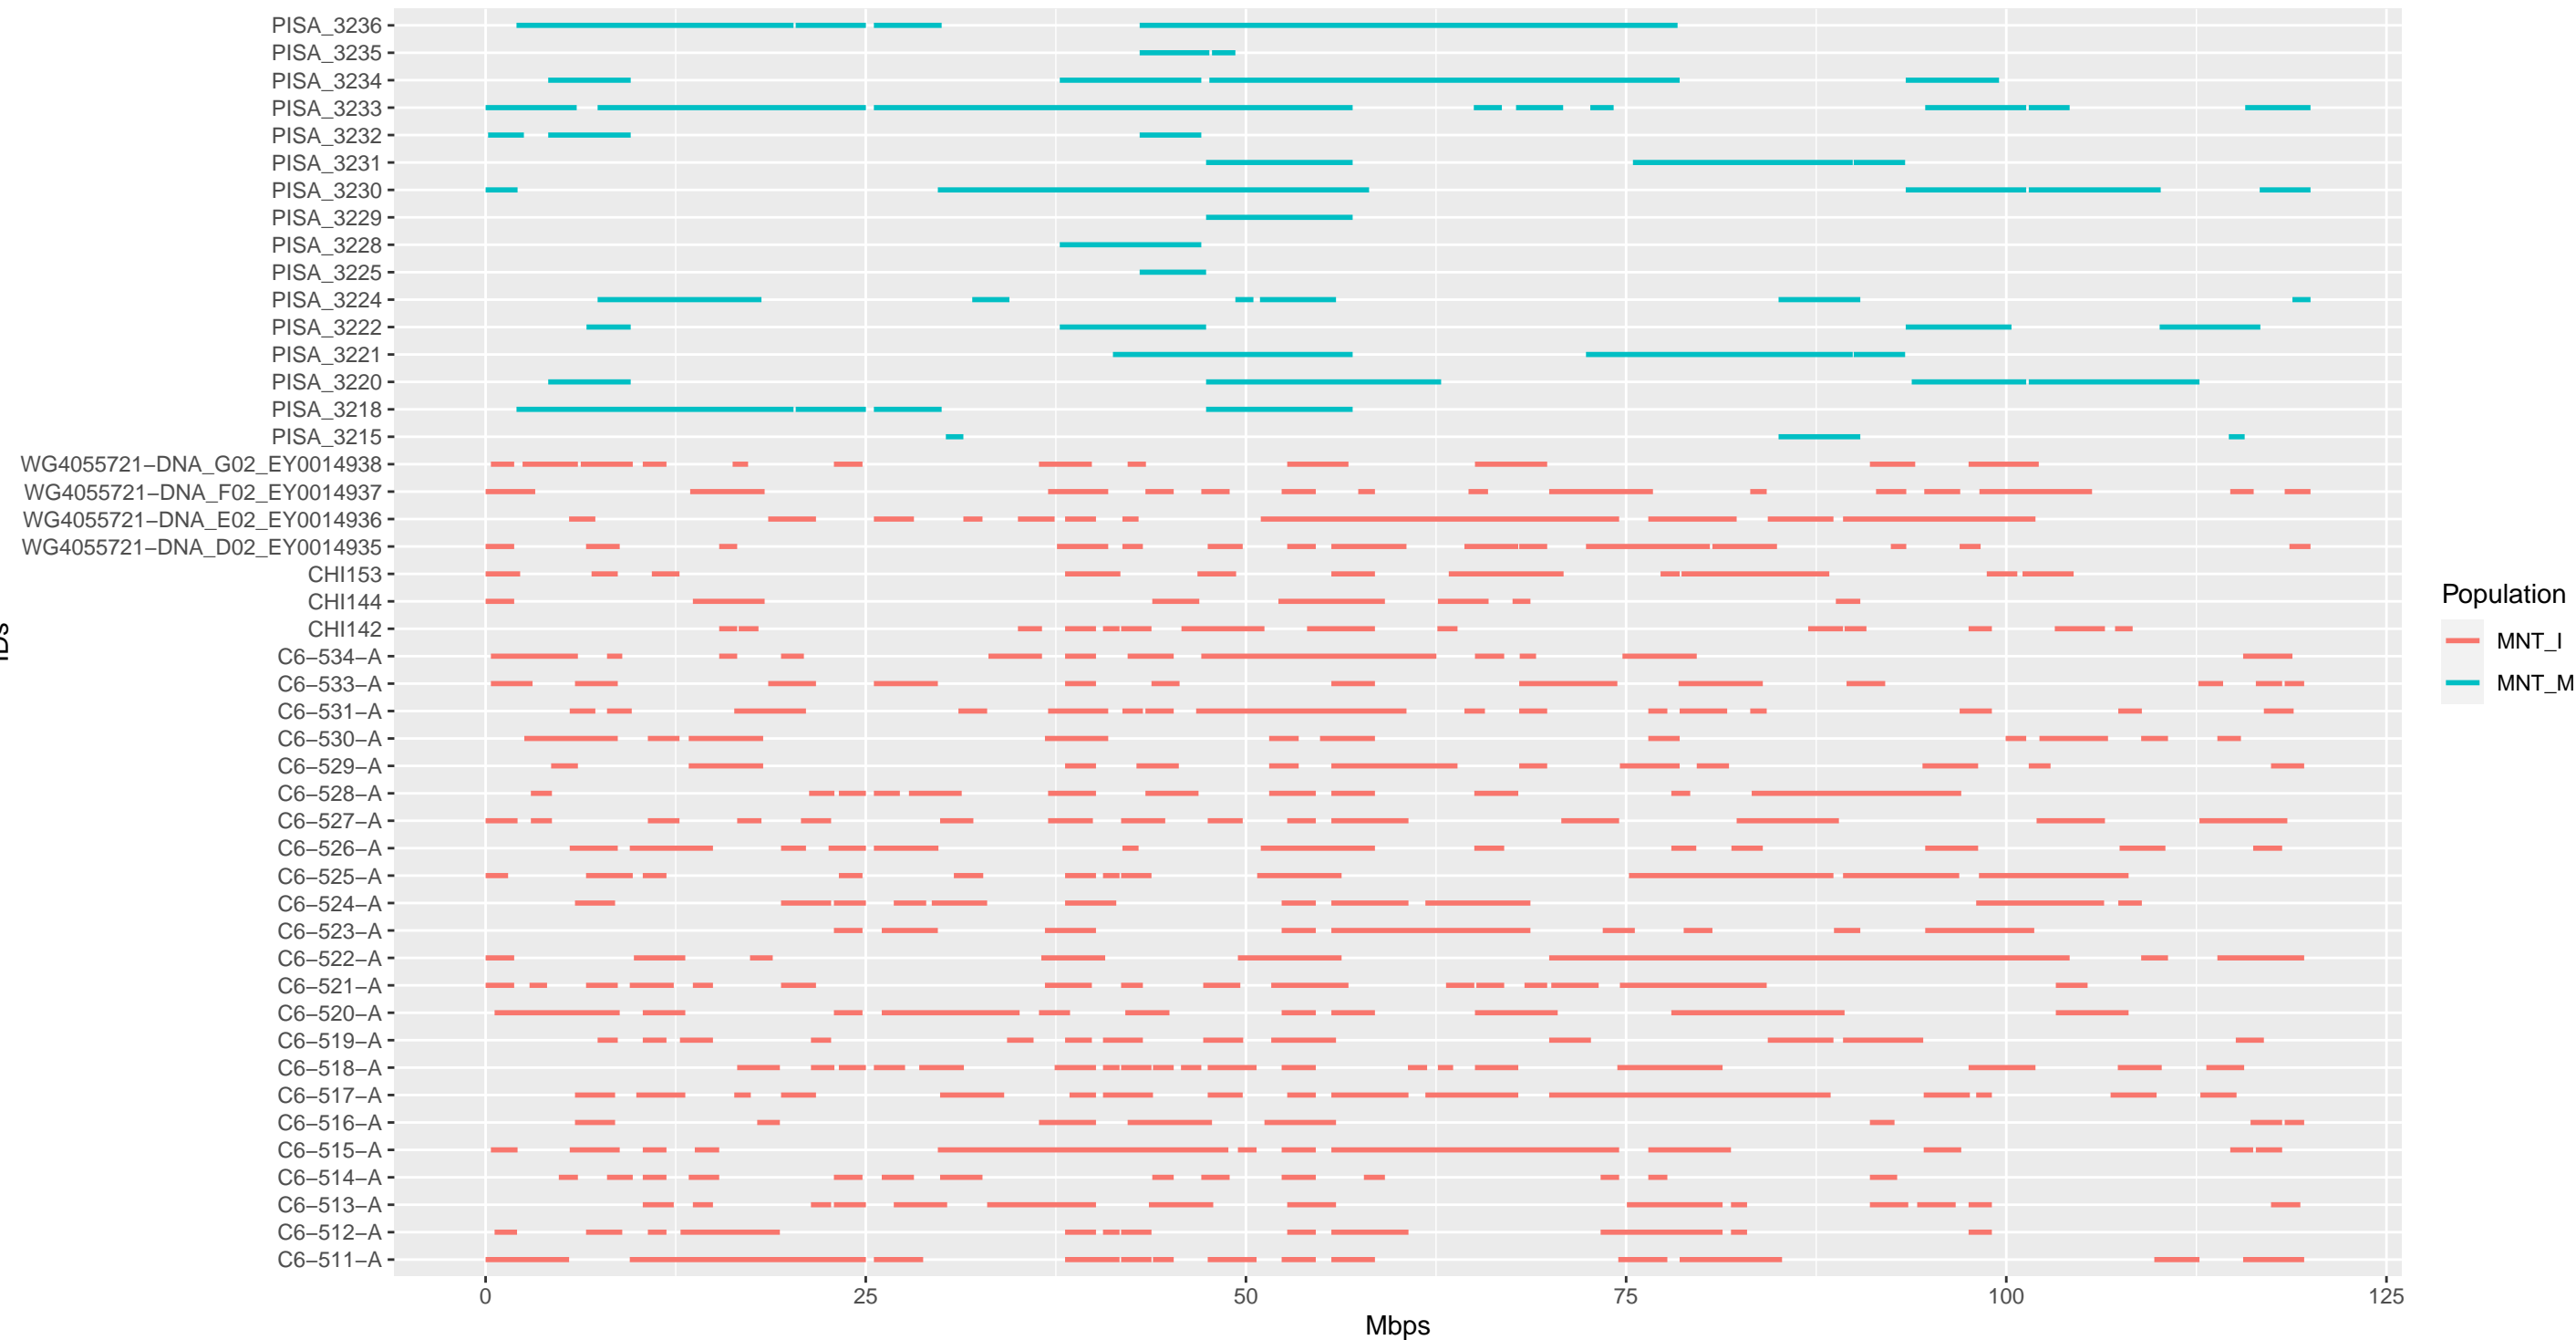

# Chromosome 4

IDs

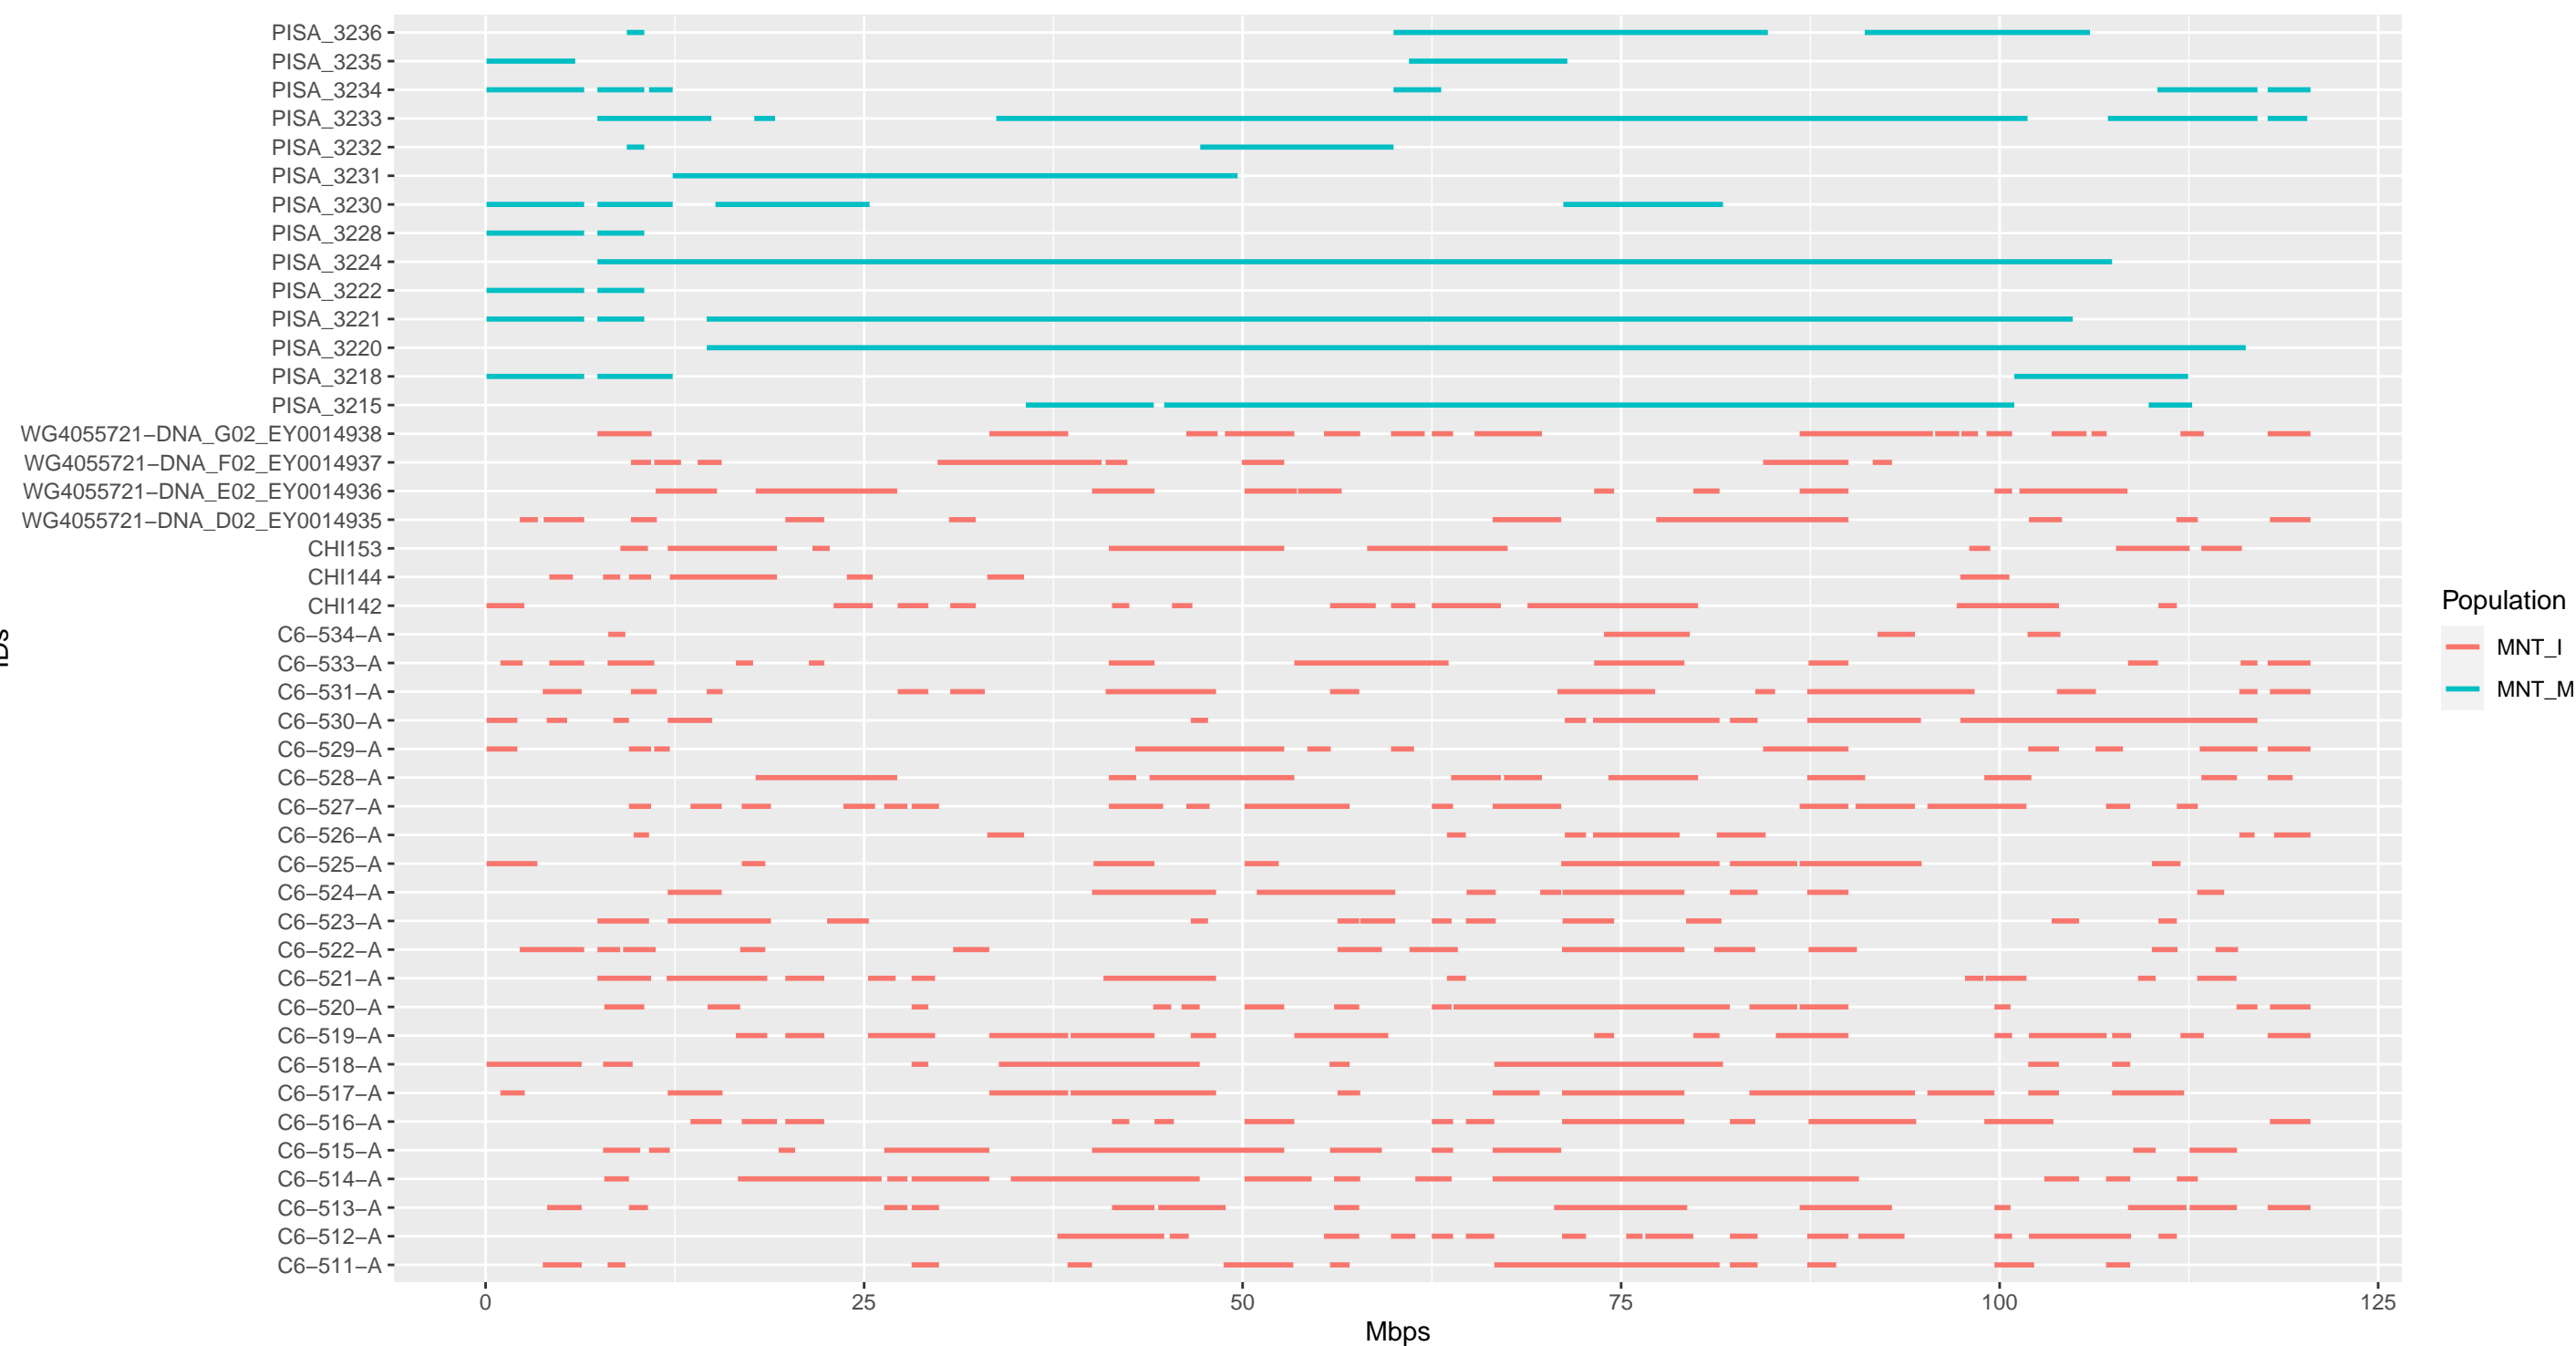

# Chromosome 5

IDs

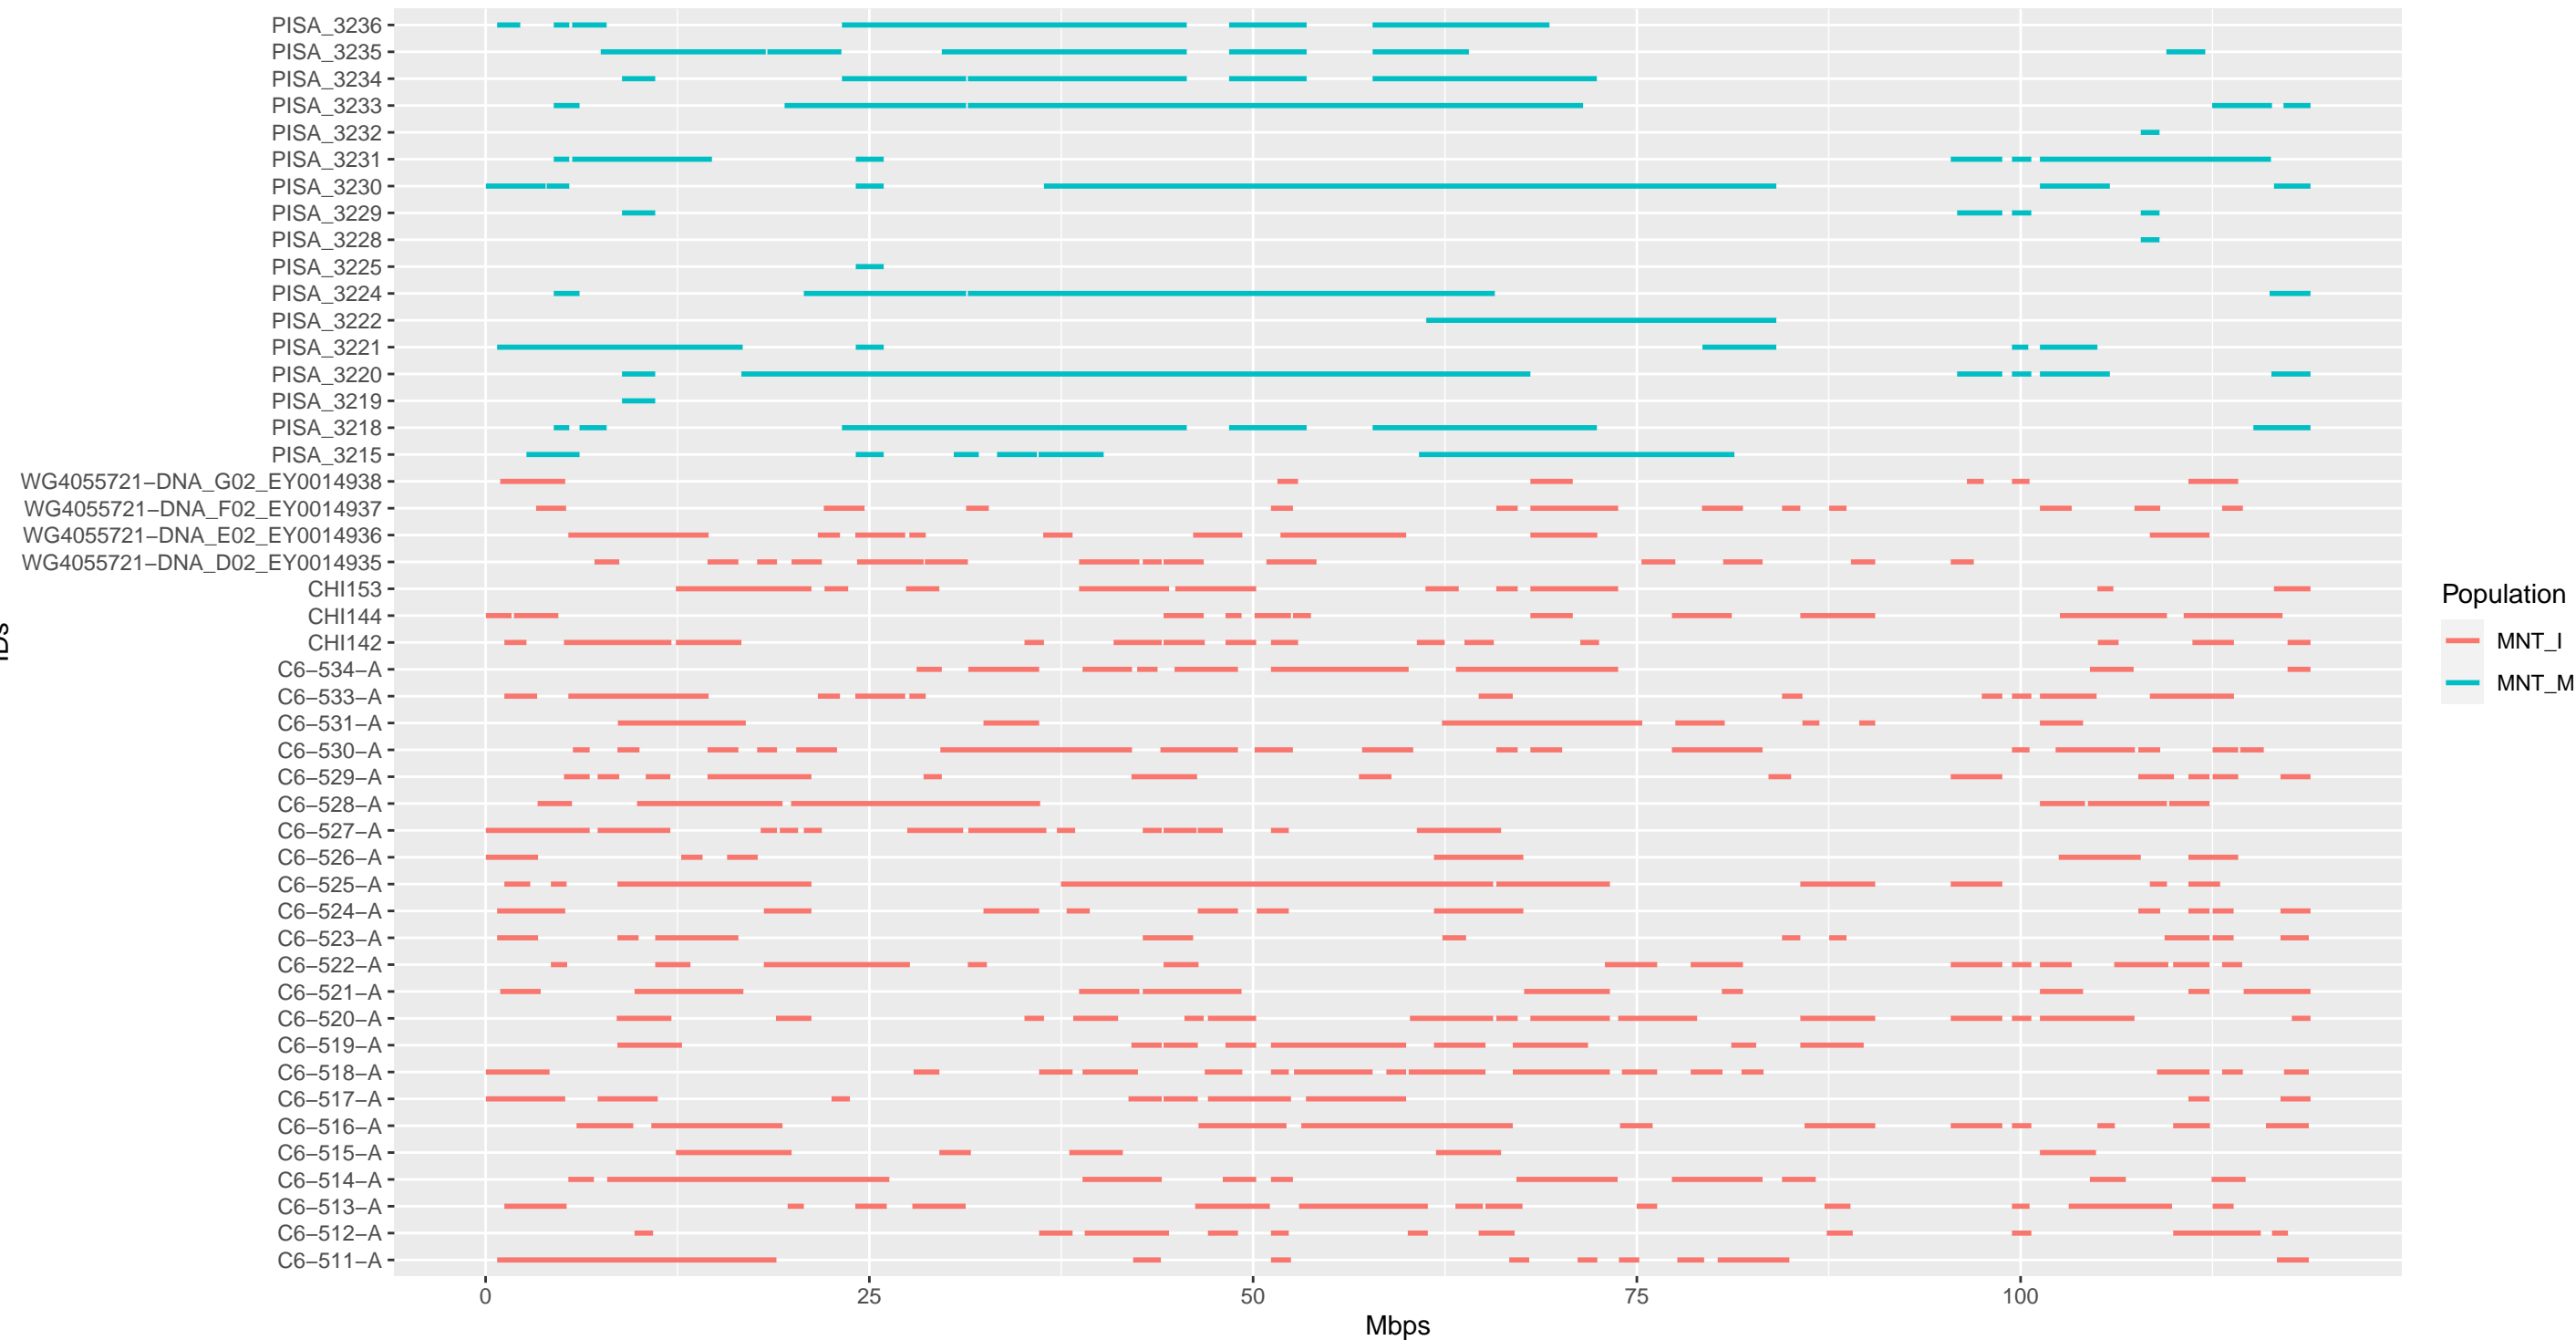

# Chromosome 6

IDs

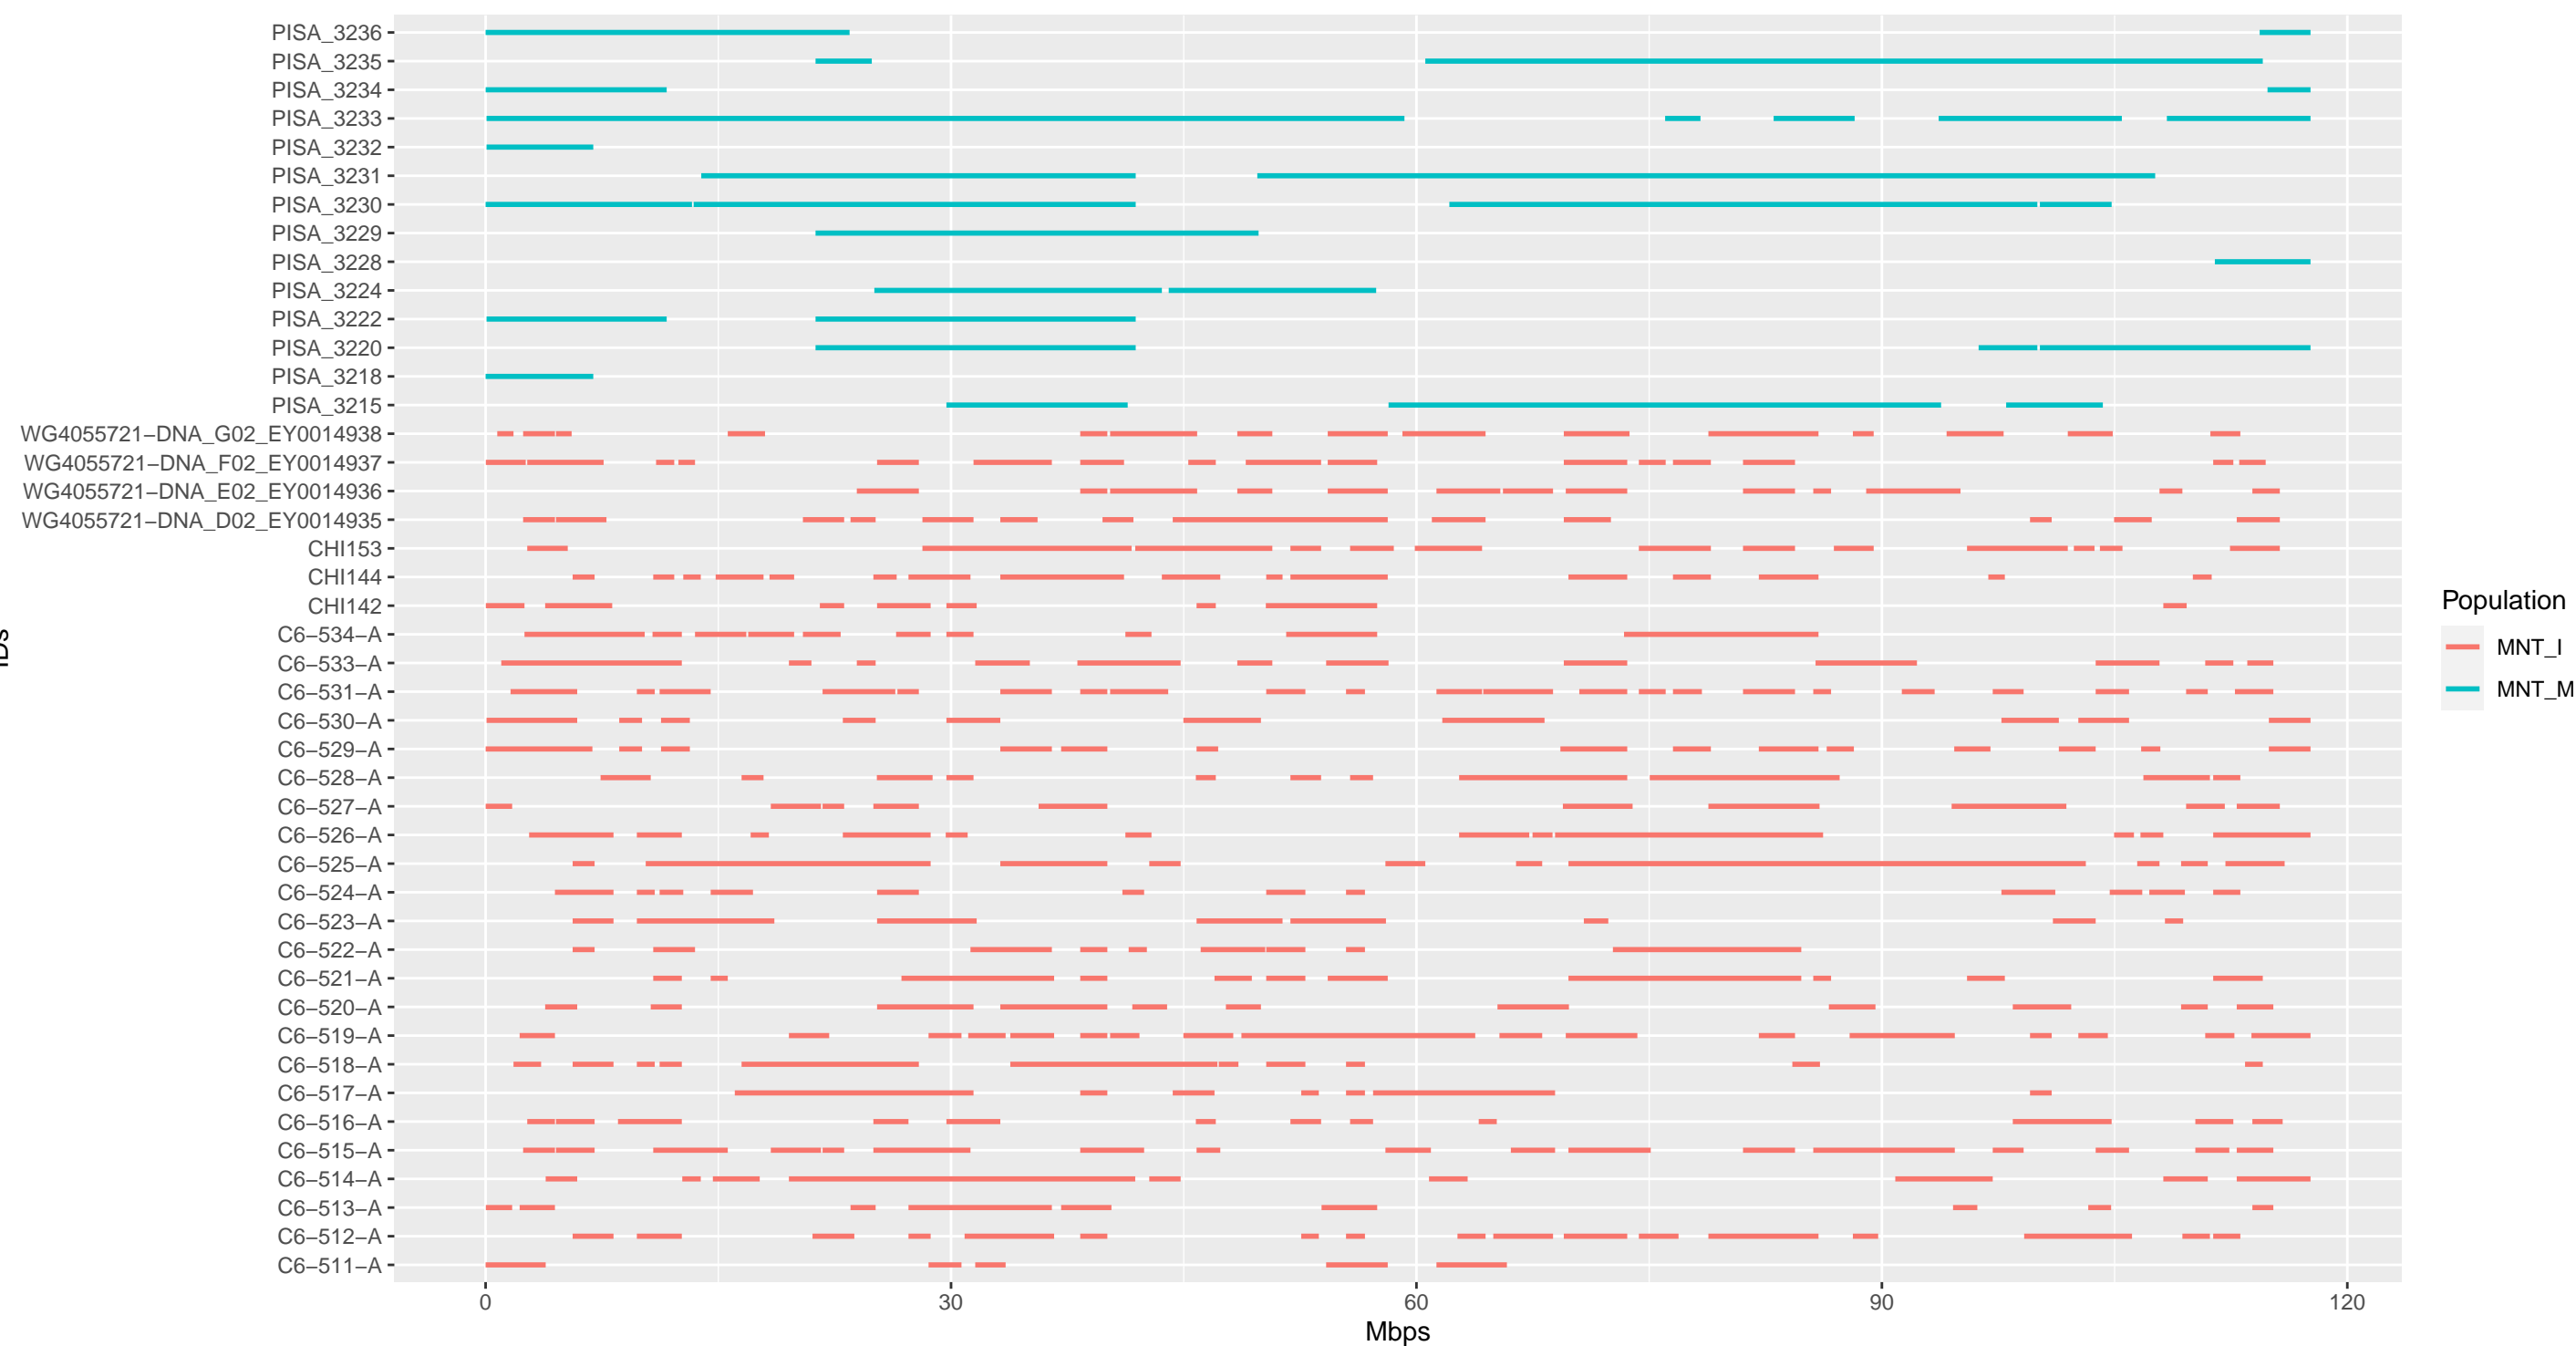

# Chromosome 7

IDs

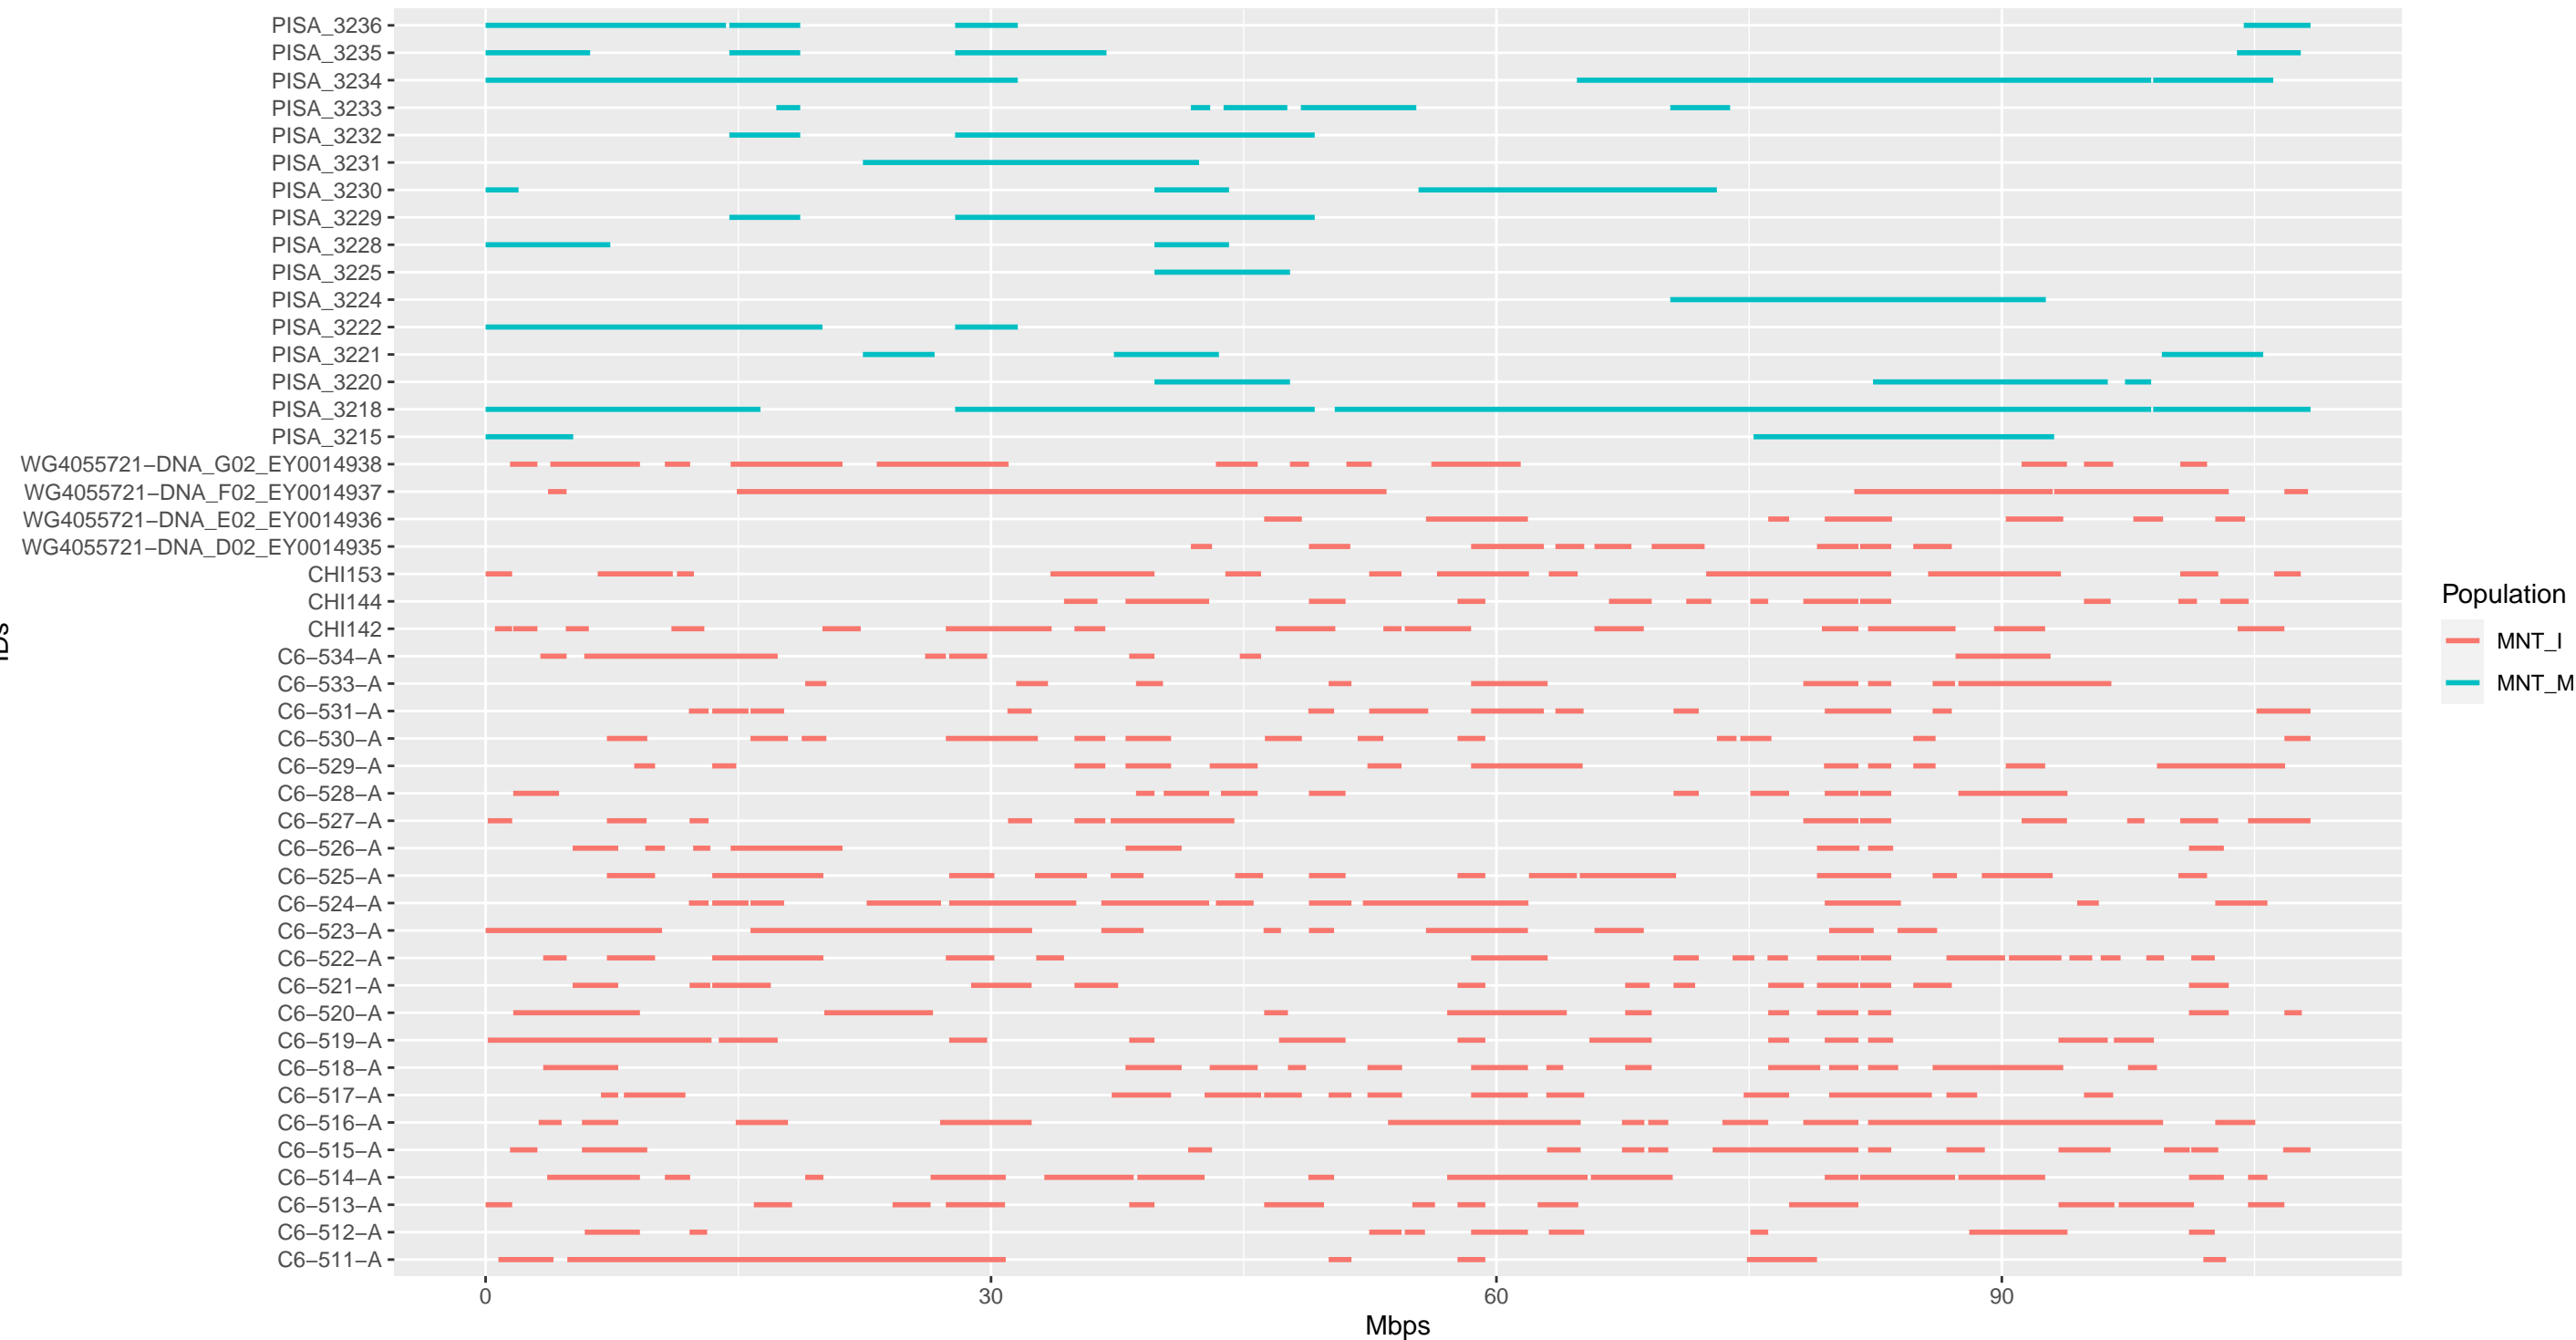

# Chromosome 8

IDs

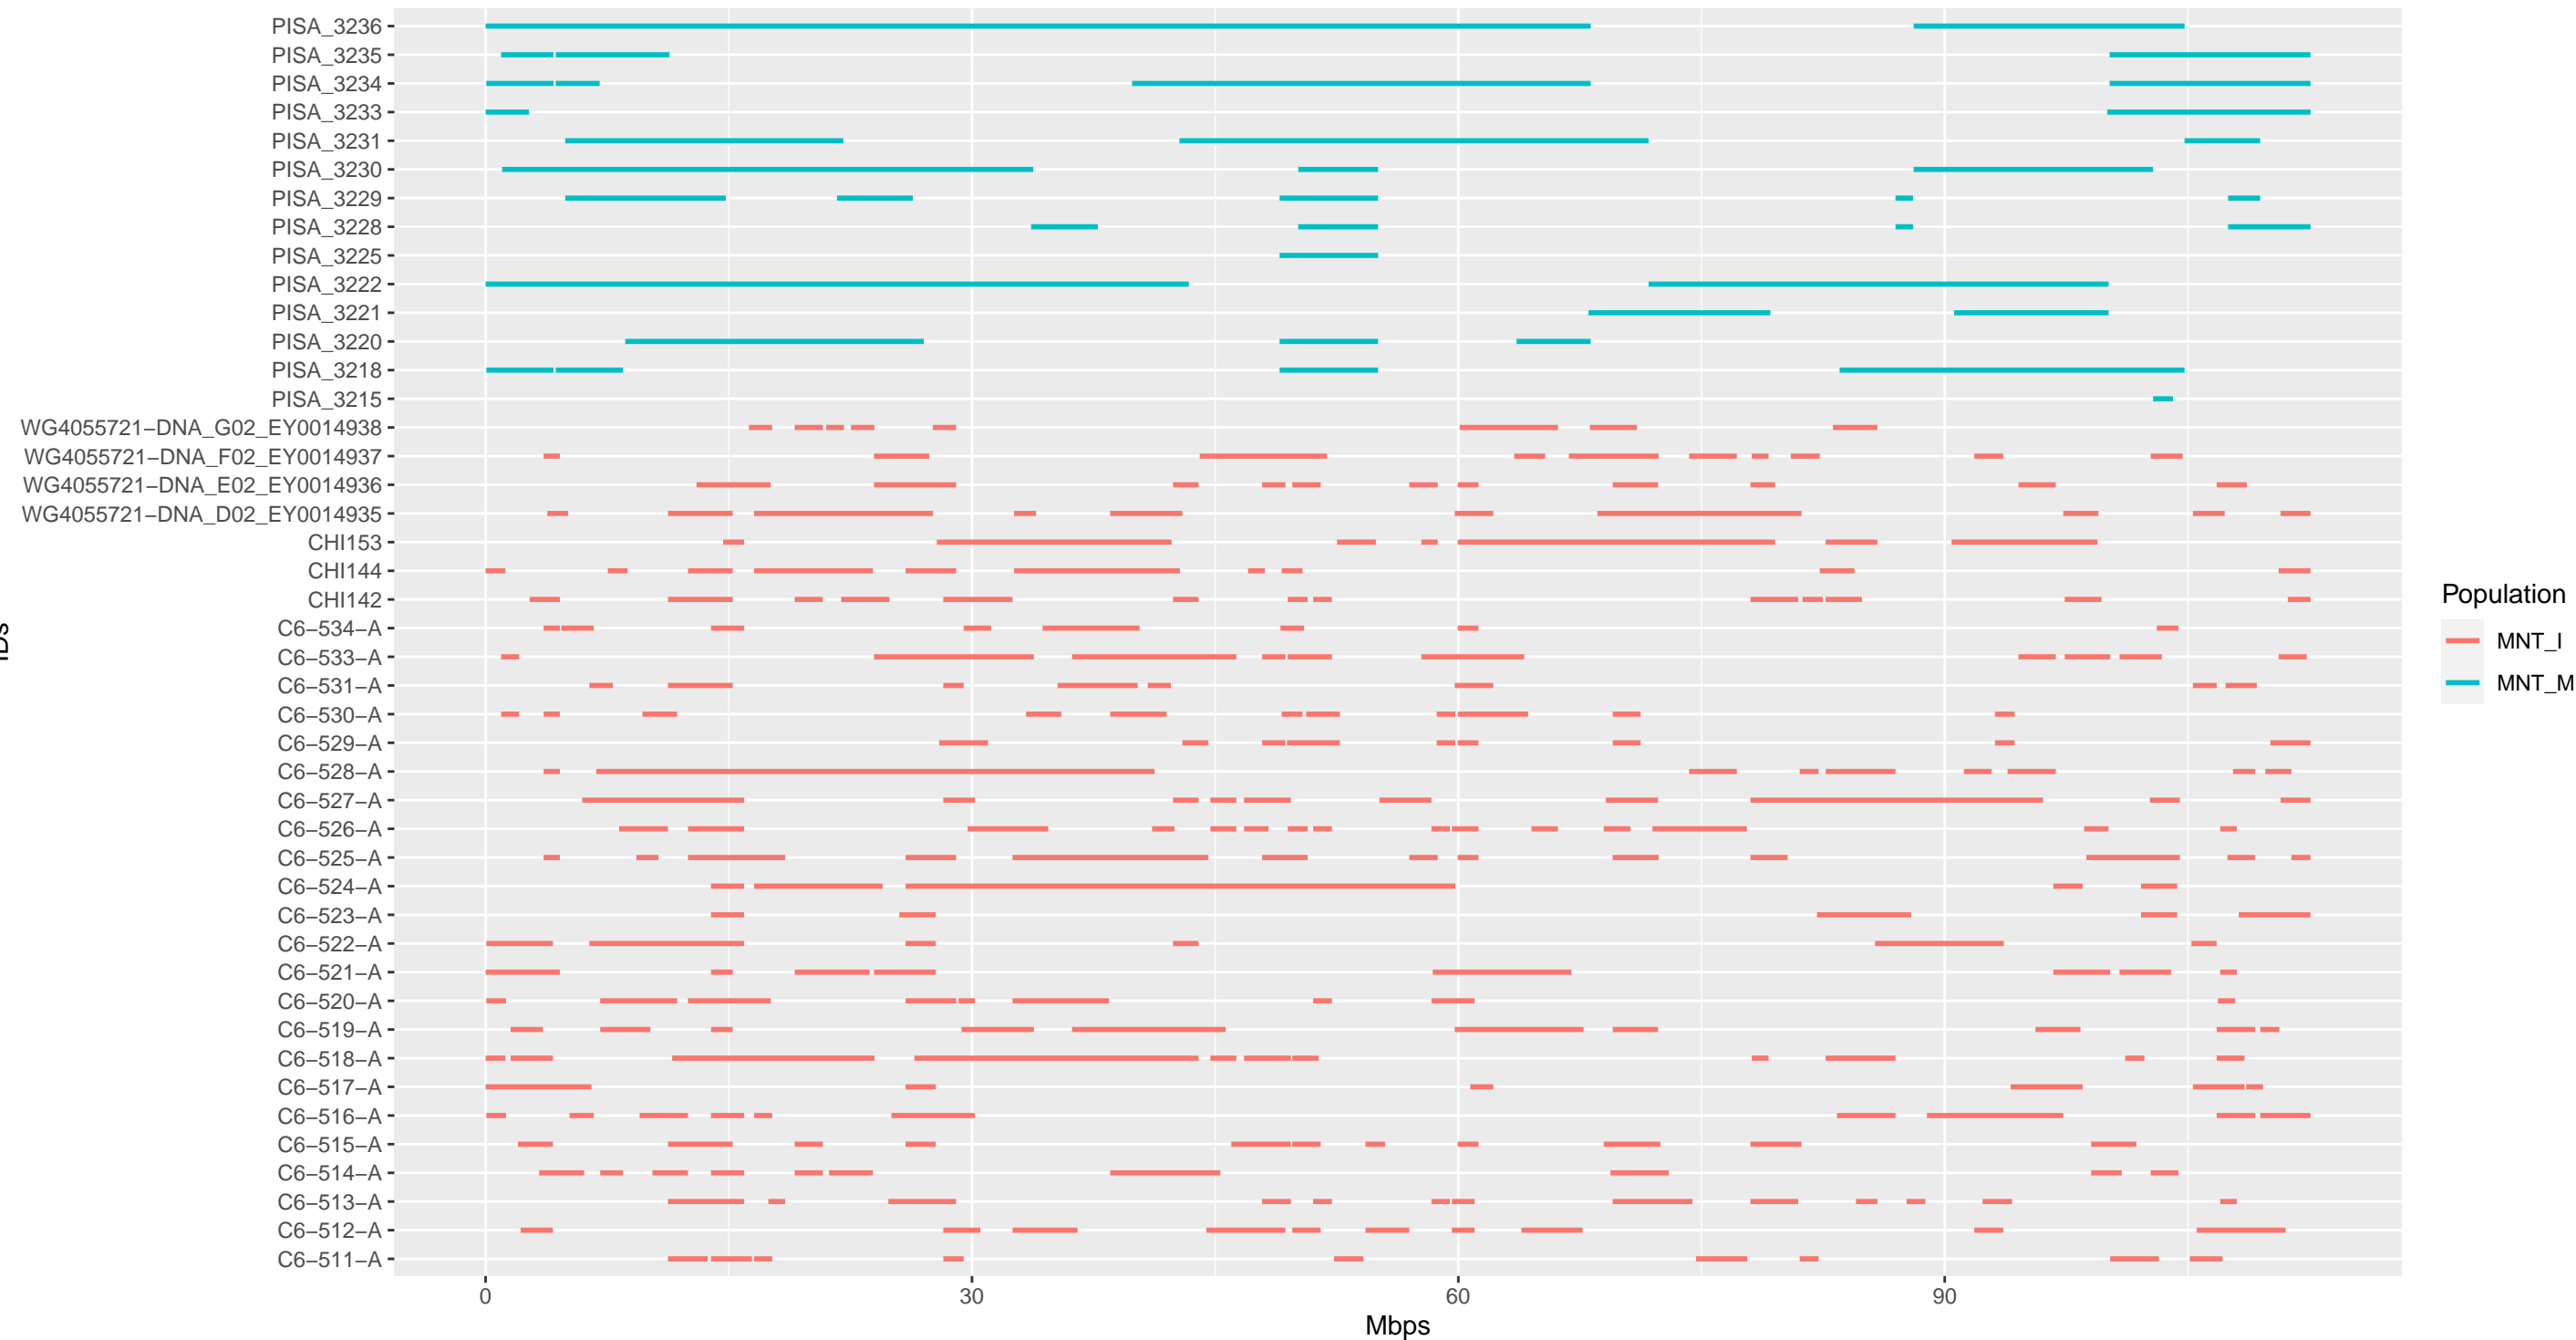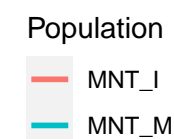



# Chromosome 9

IDs

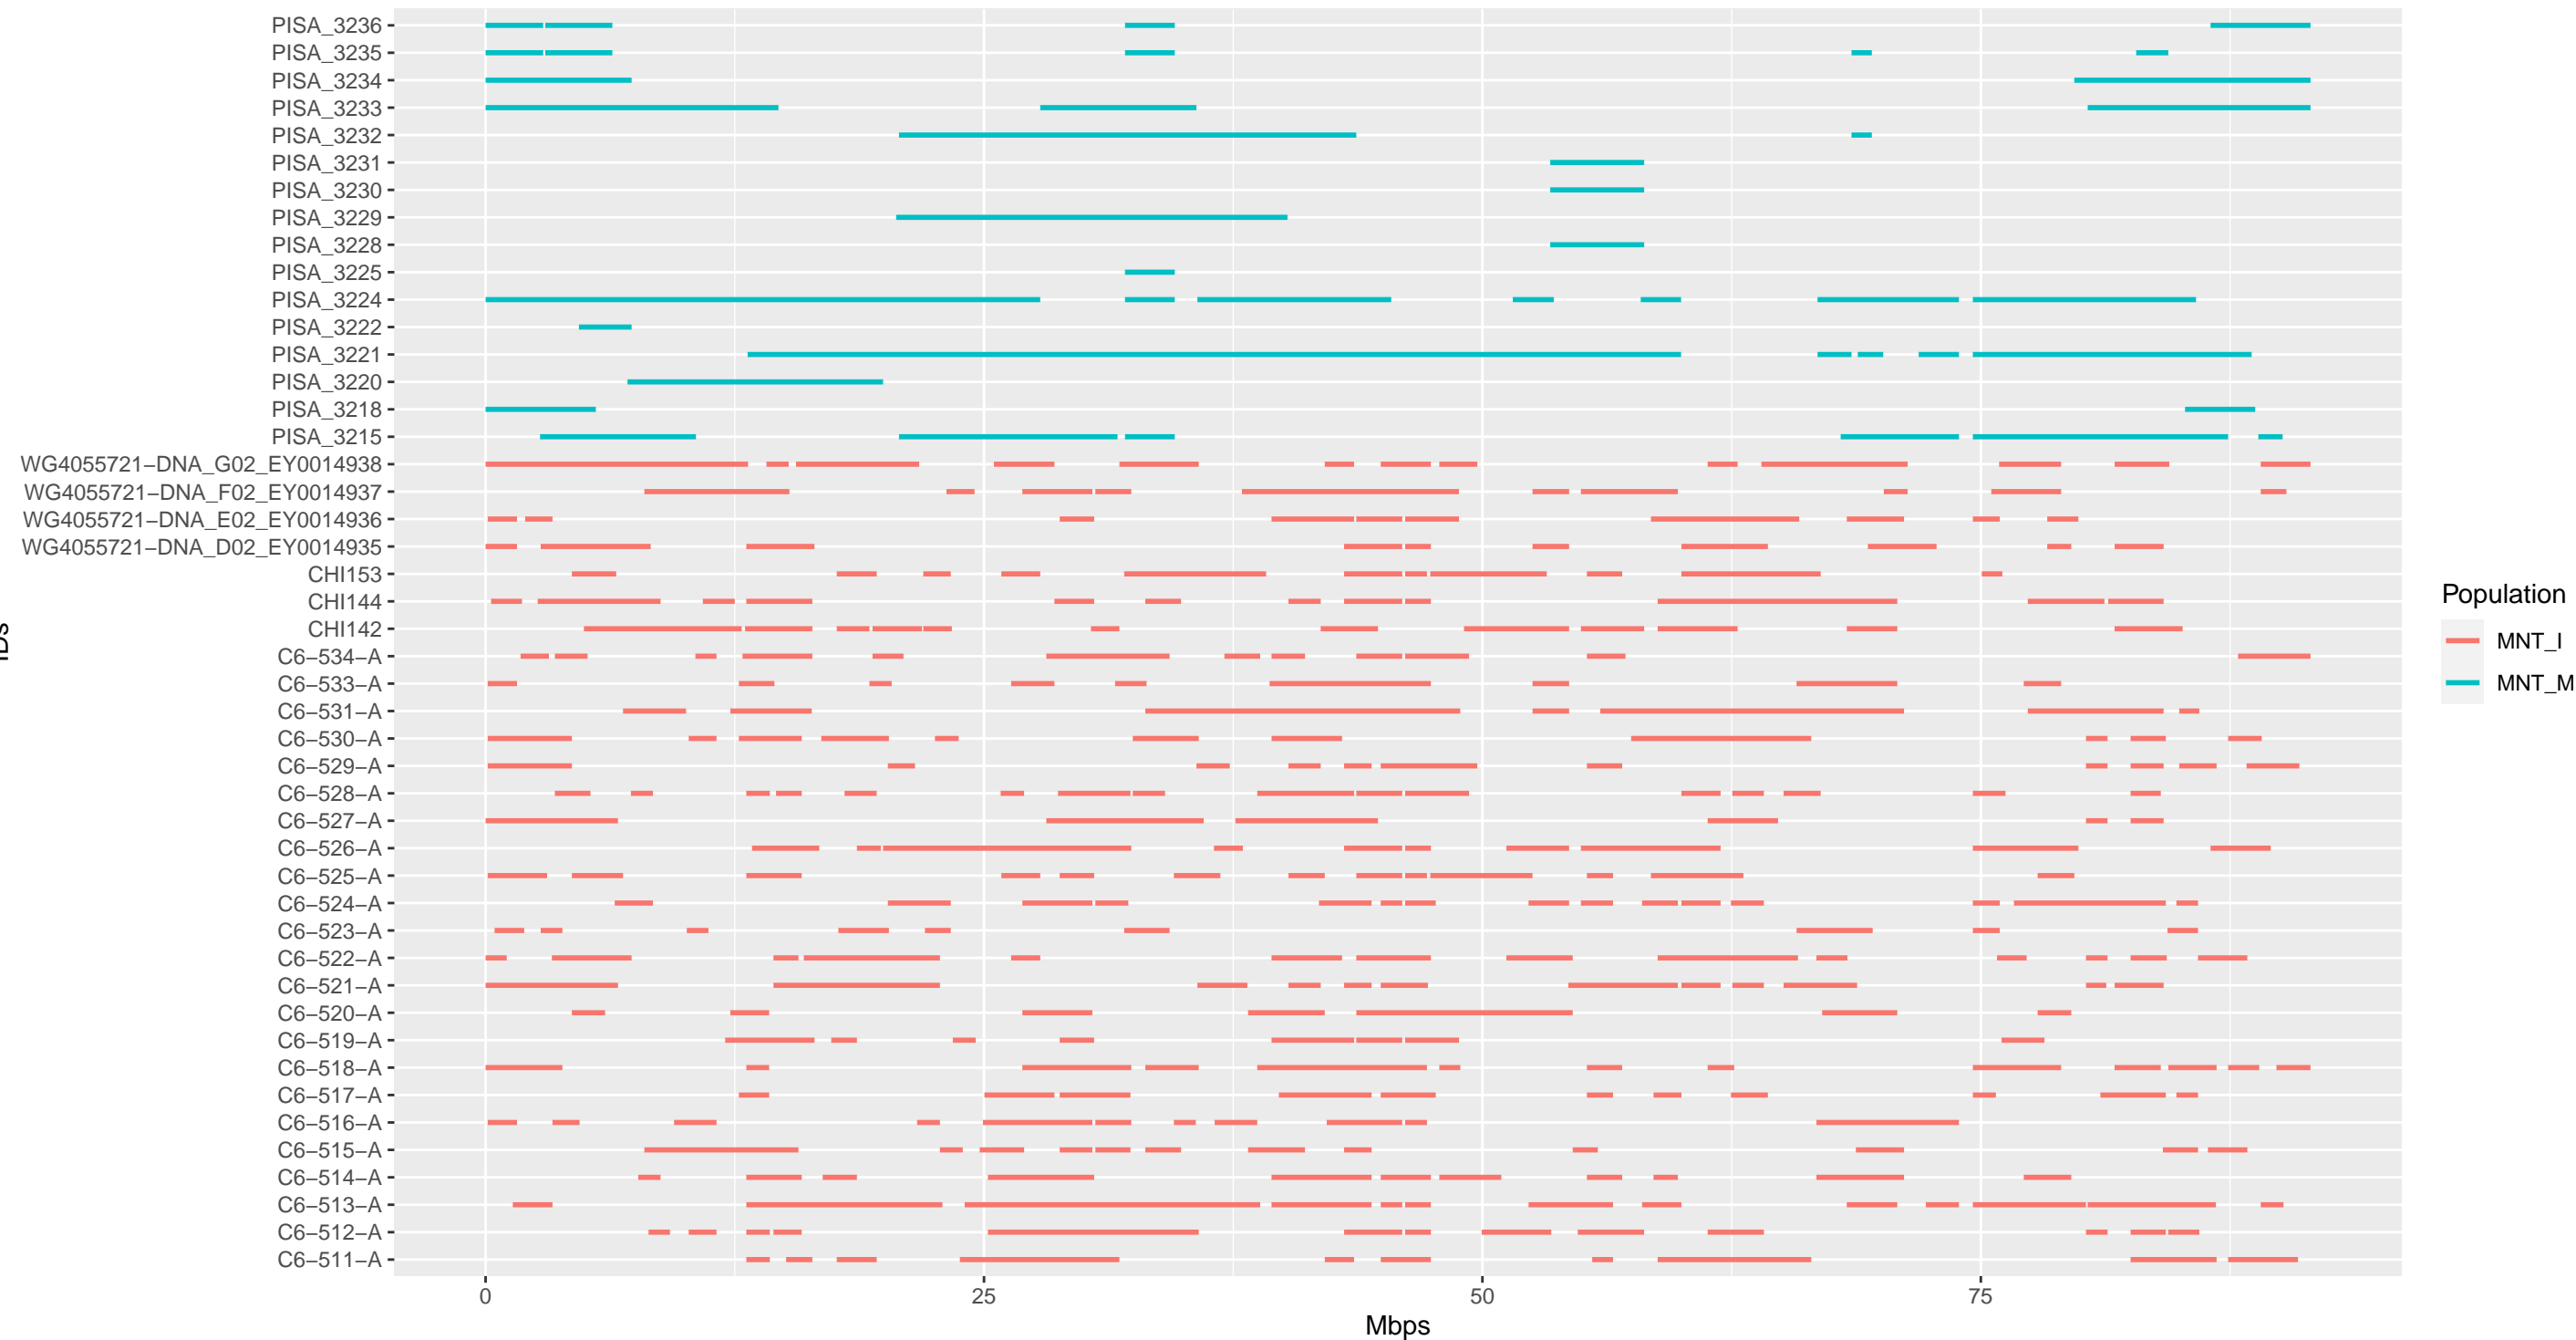

Chromosome 10

IDs

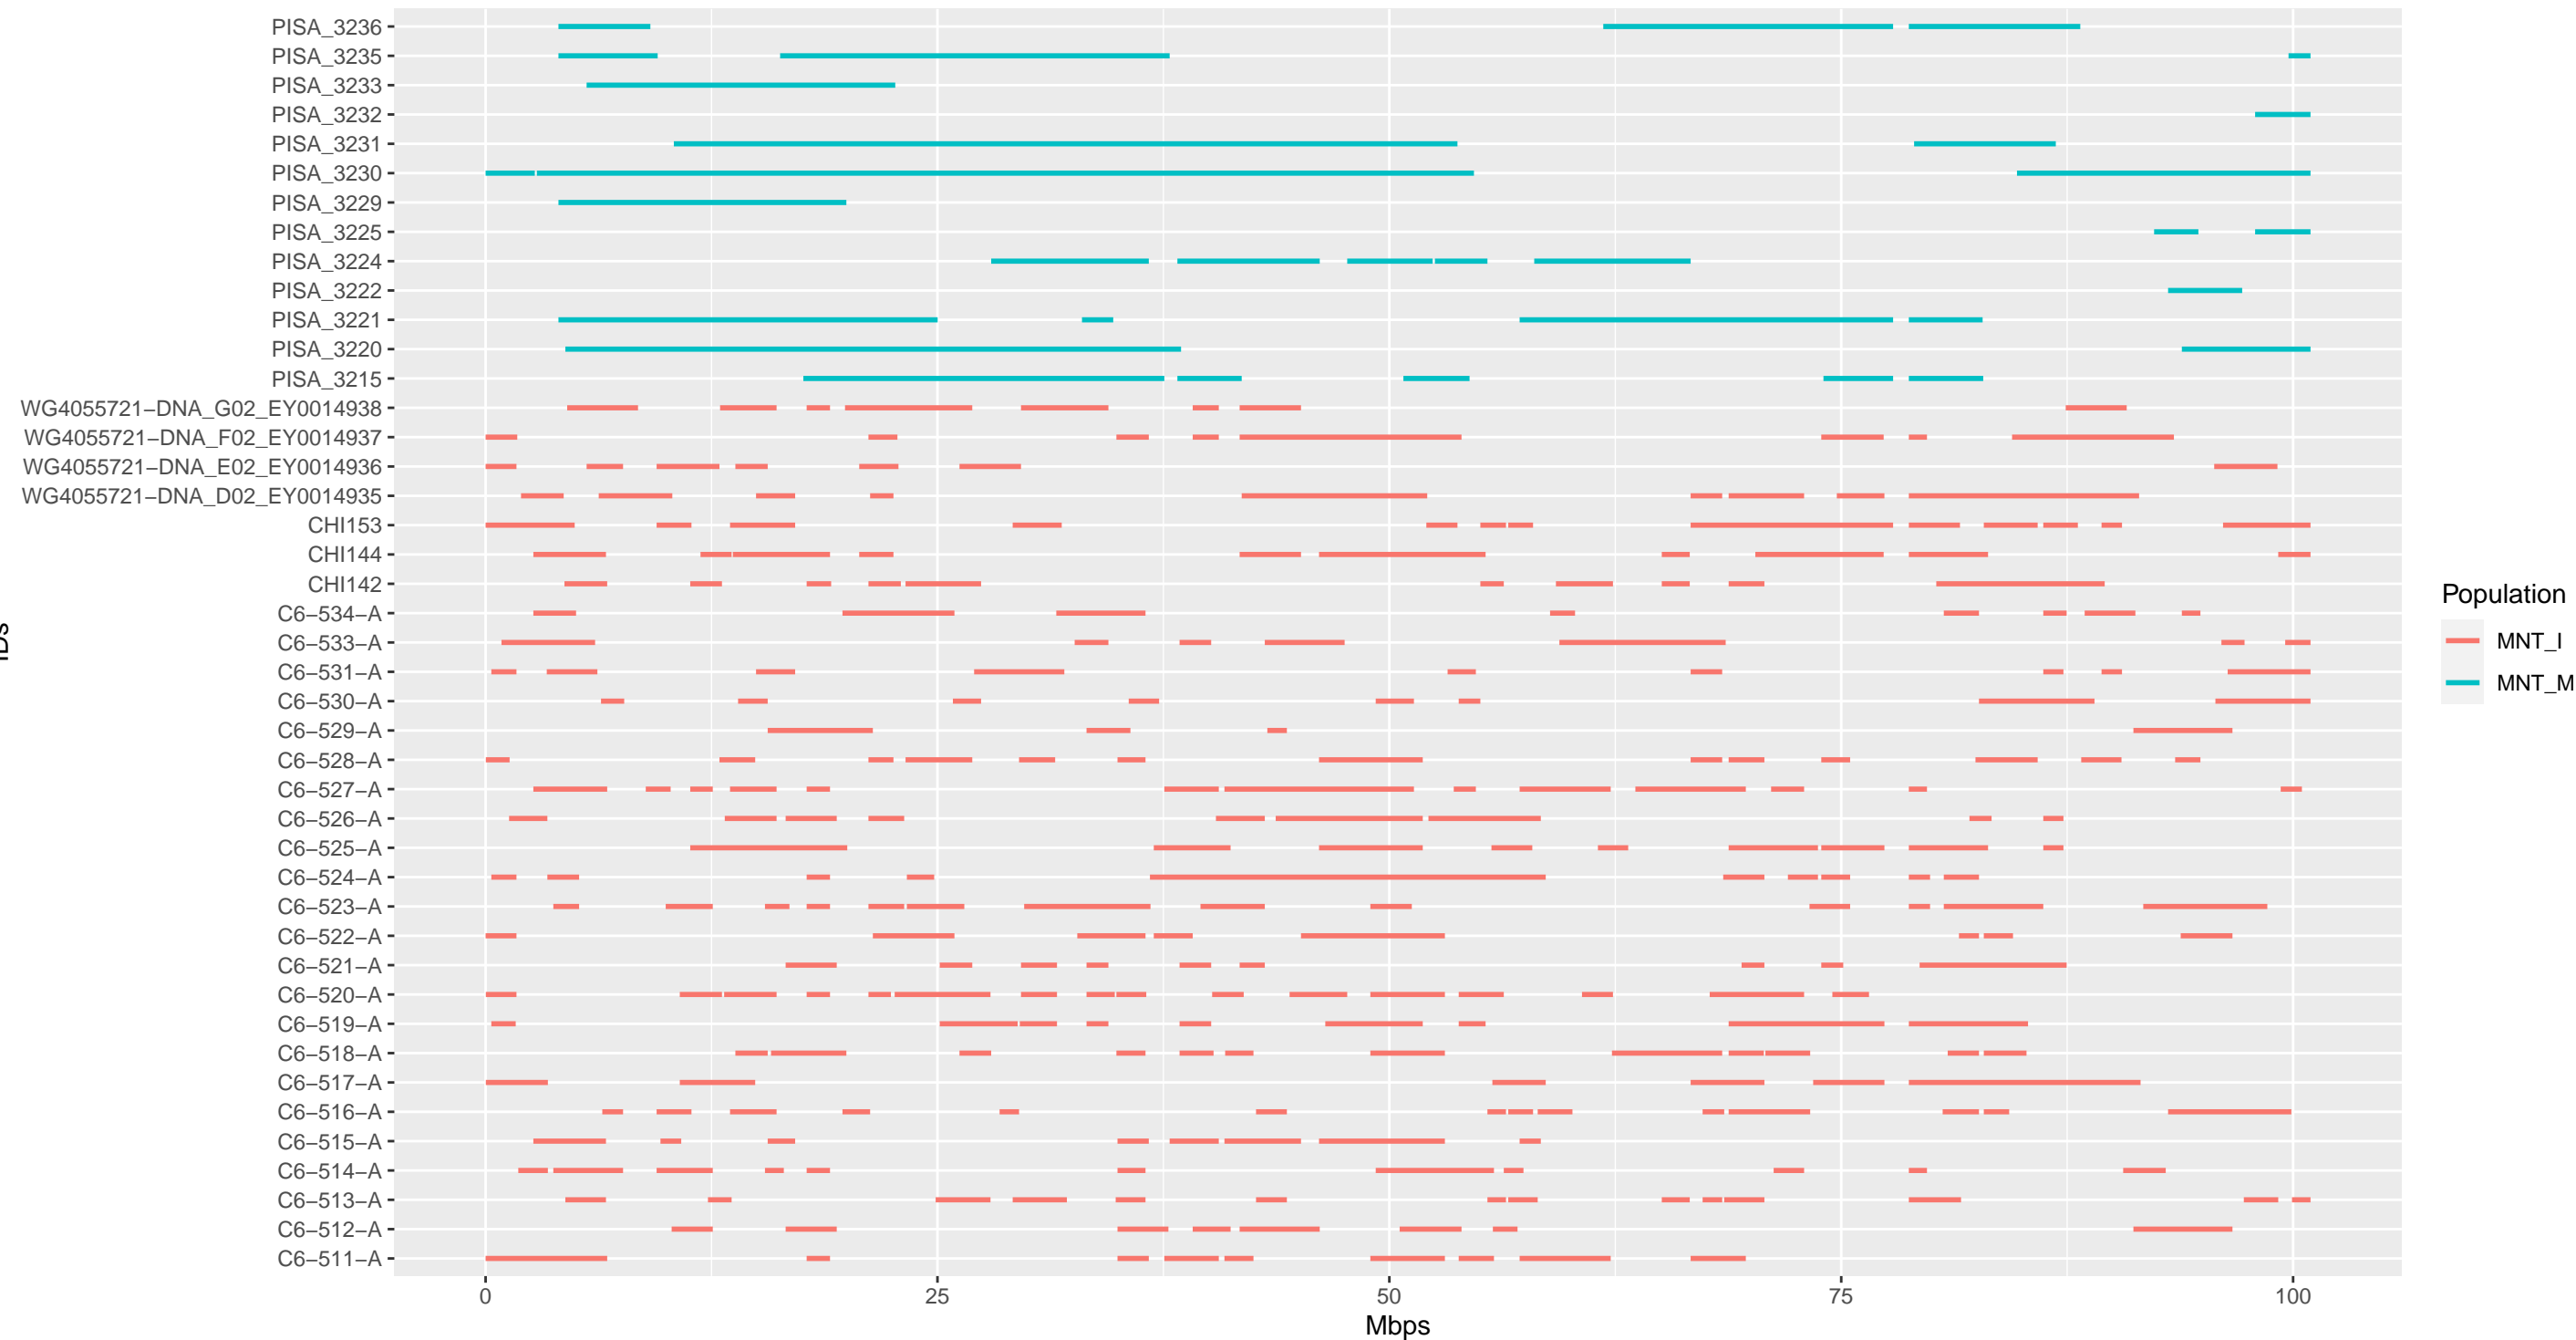

Chromosome 11

IDs

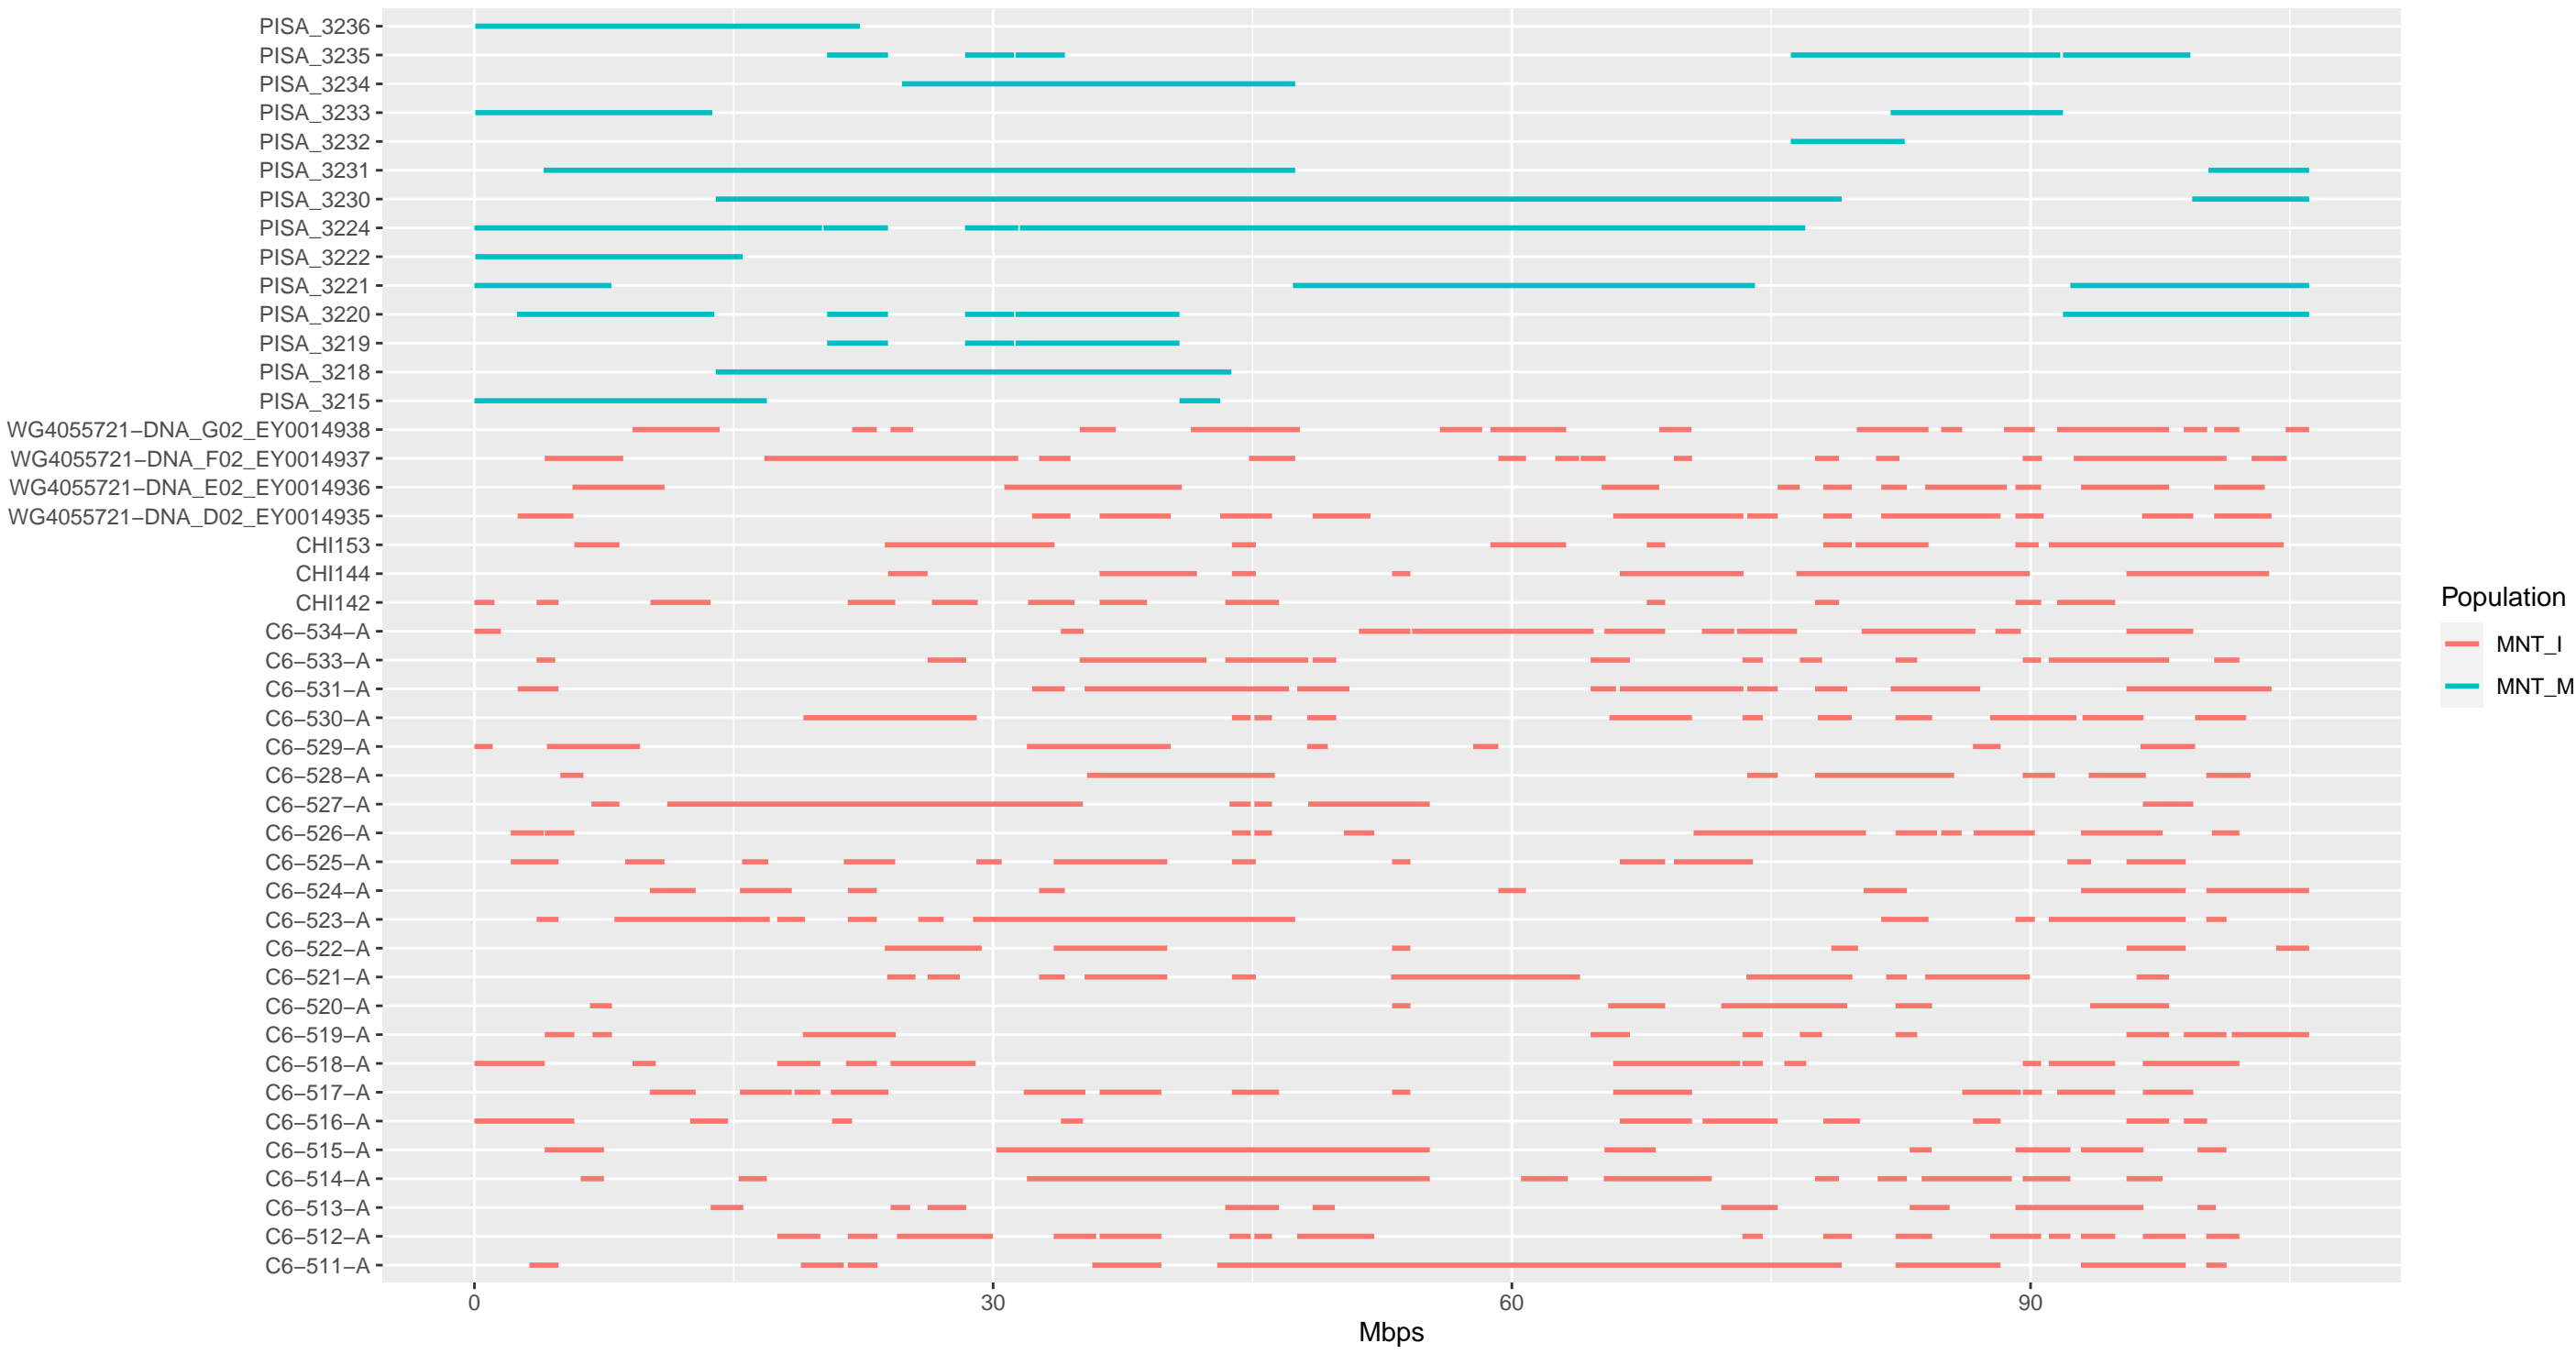

Chromosome 12

IDs

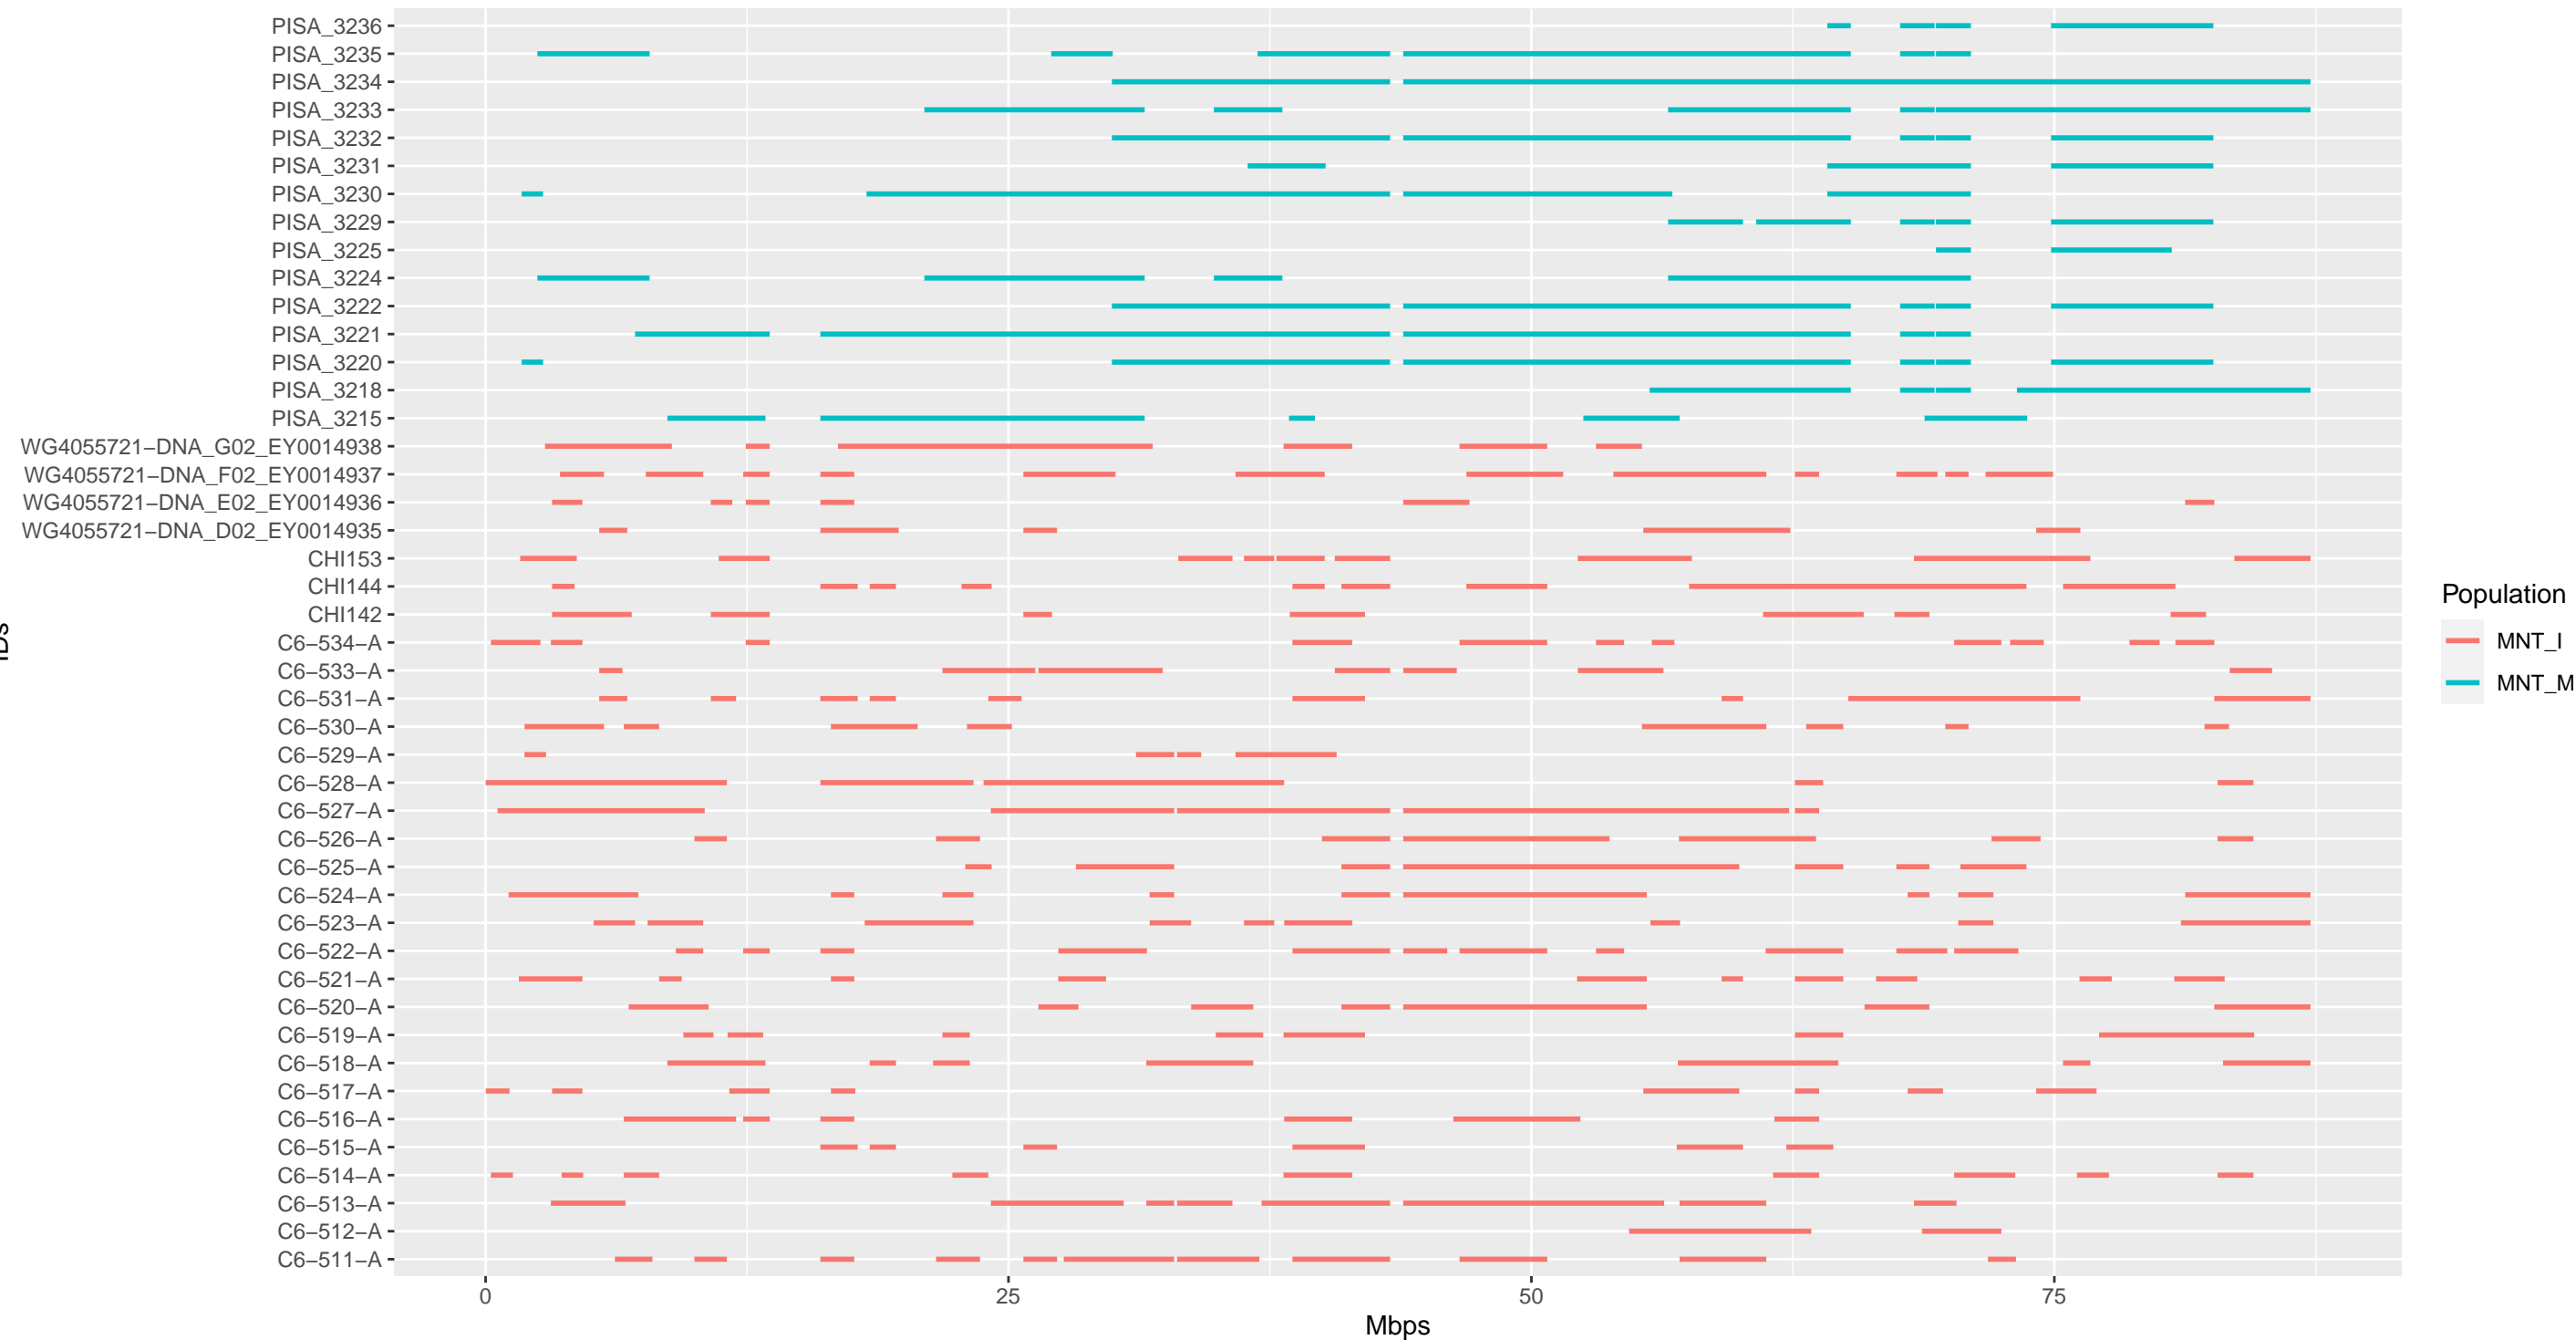

Chromosome 13

IDs

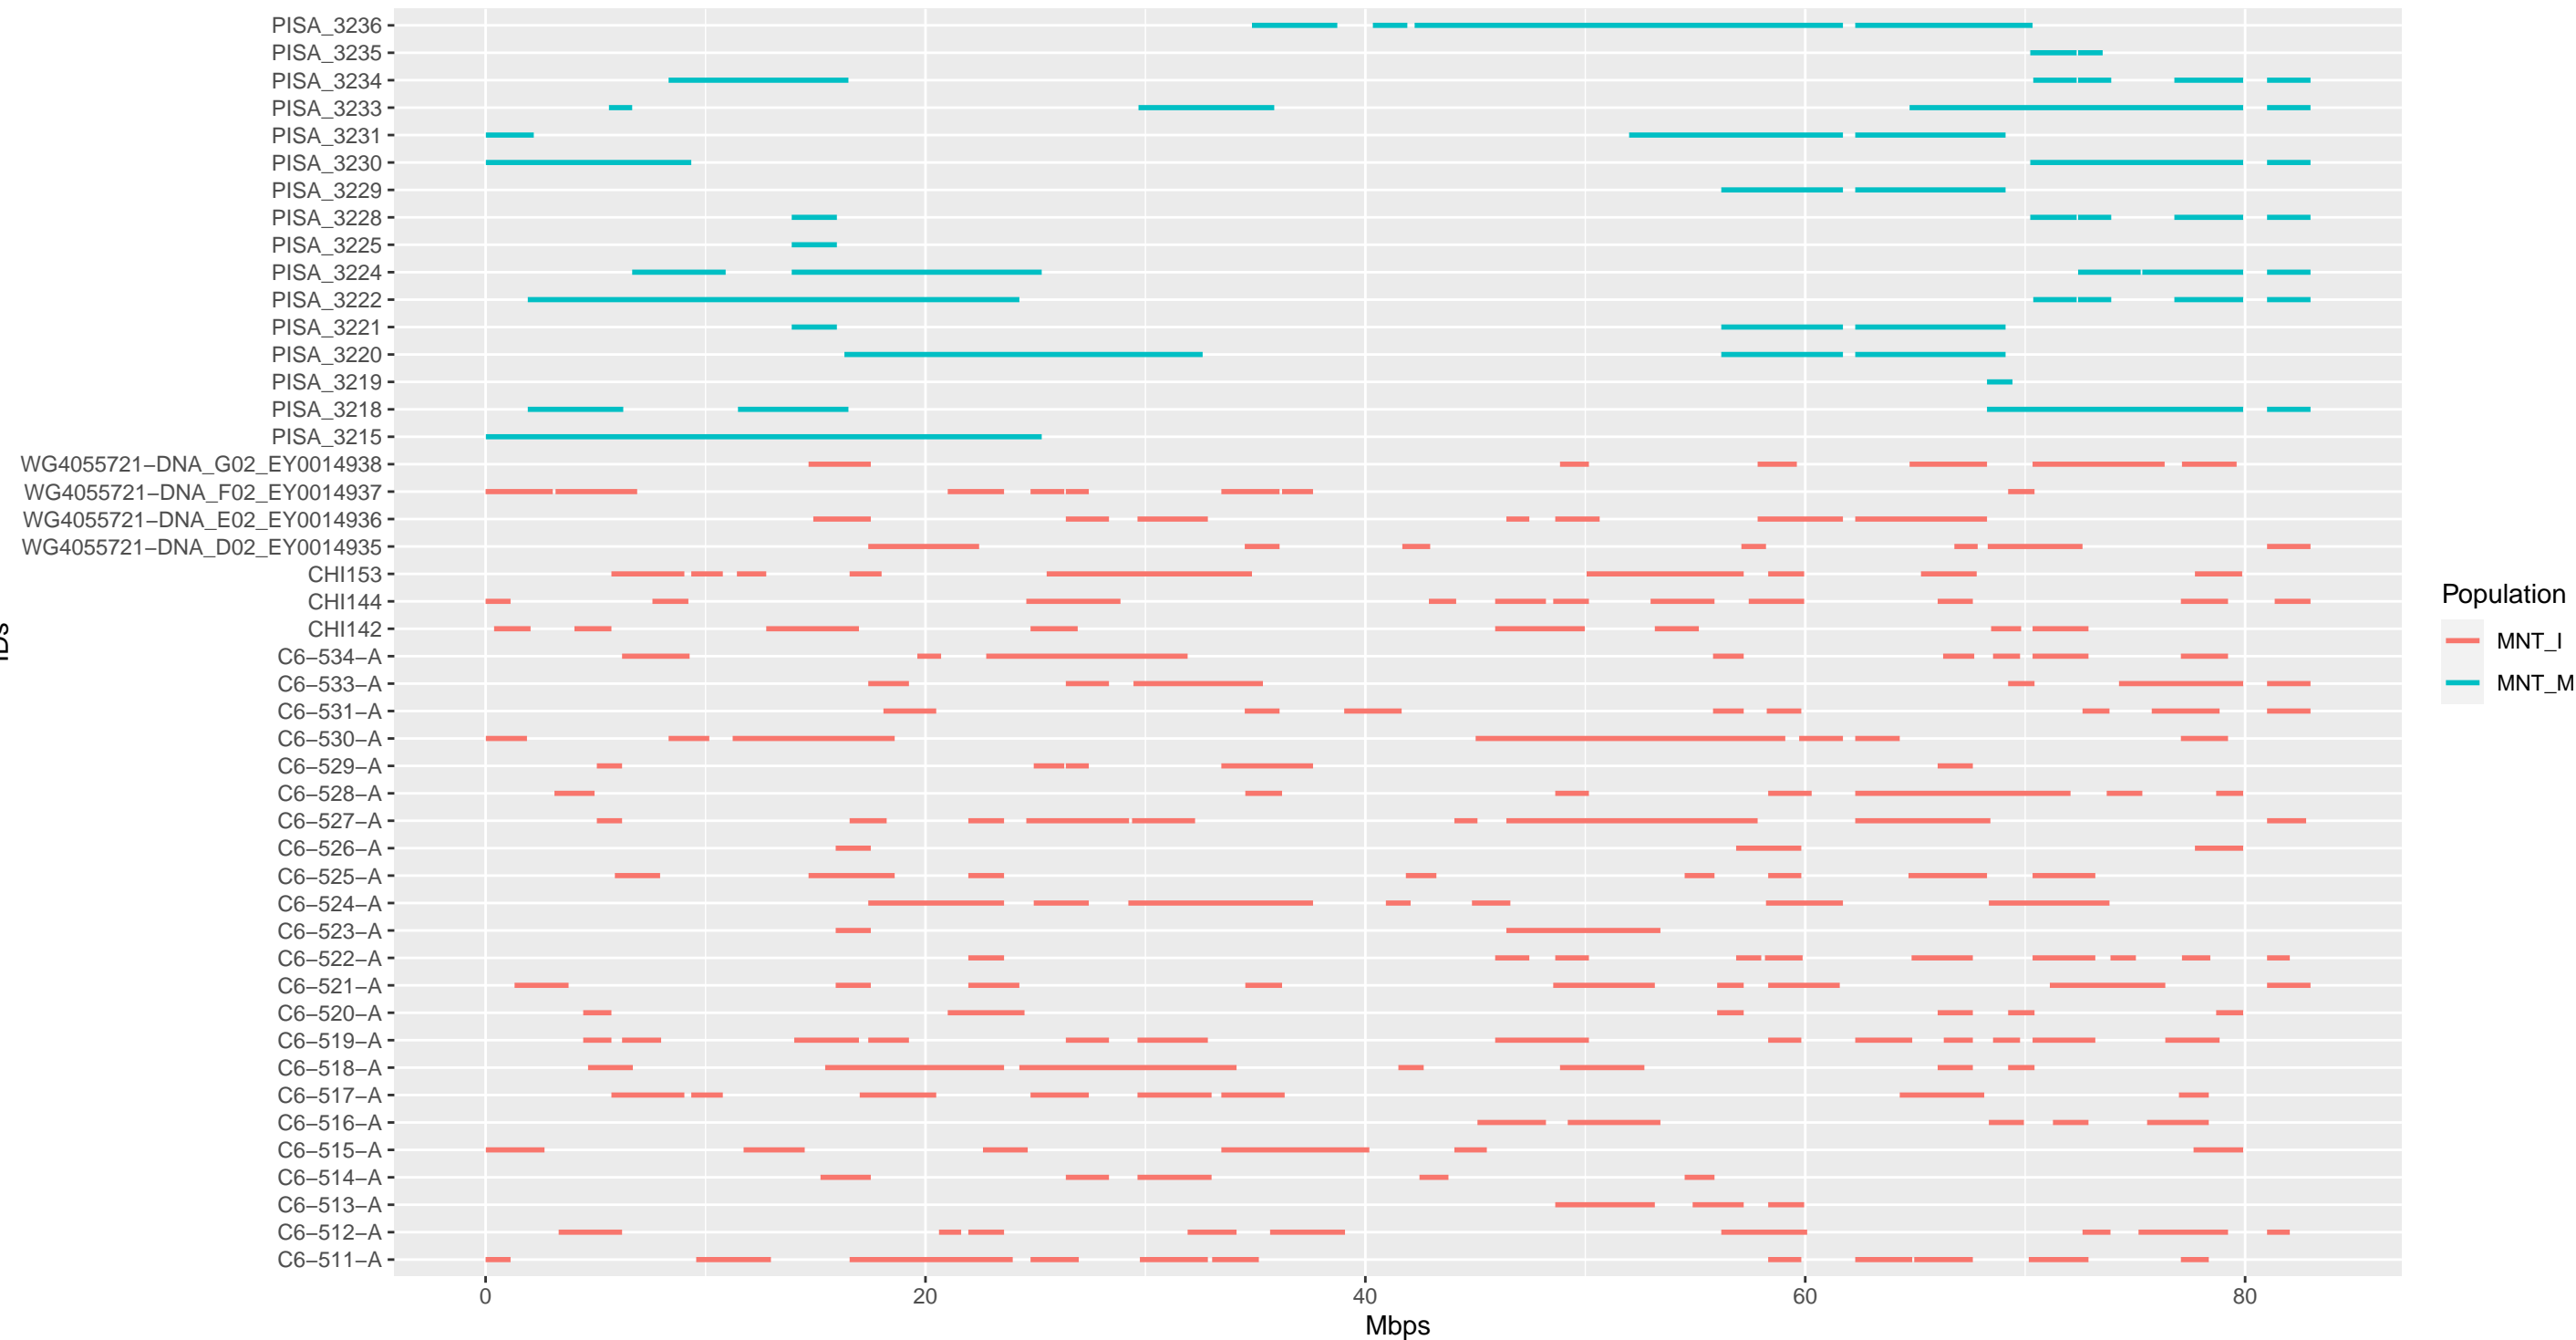

Chromosome 14

IDs

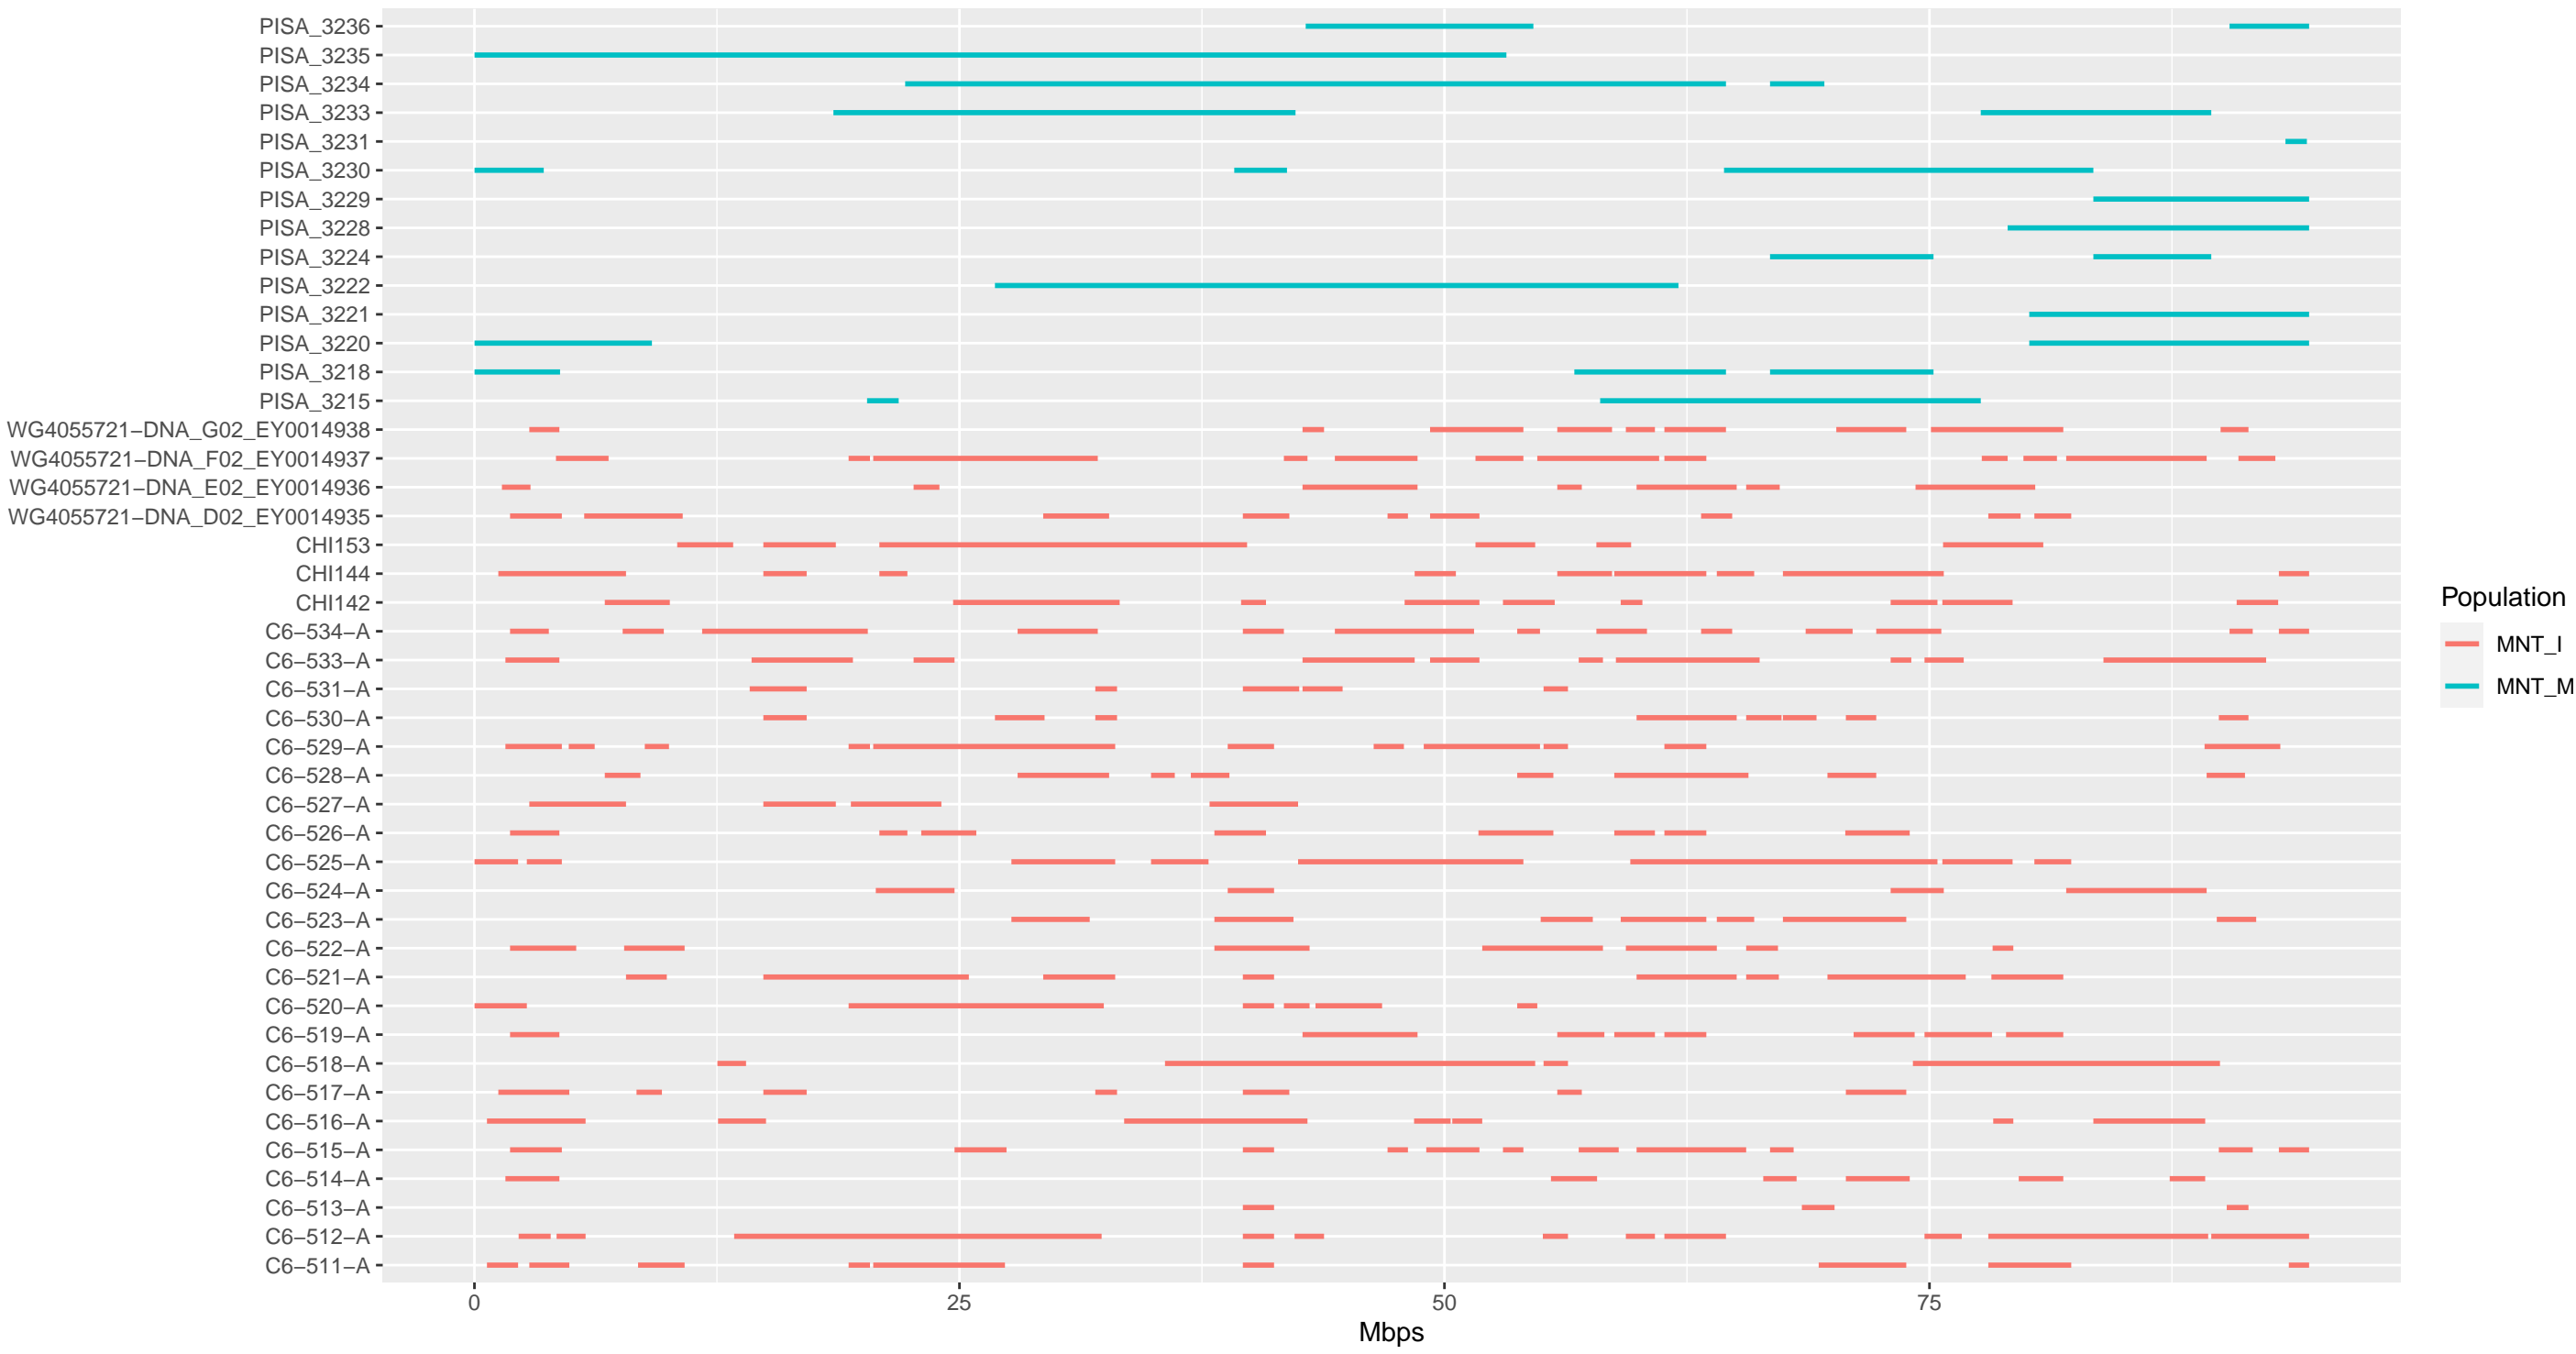

# Chromosome 15

IDs

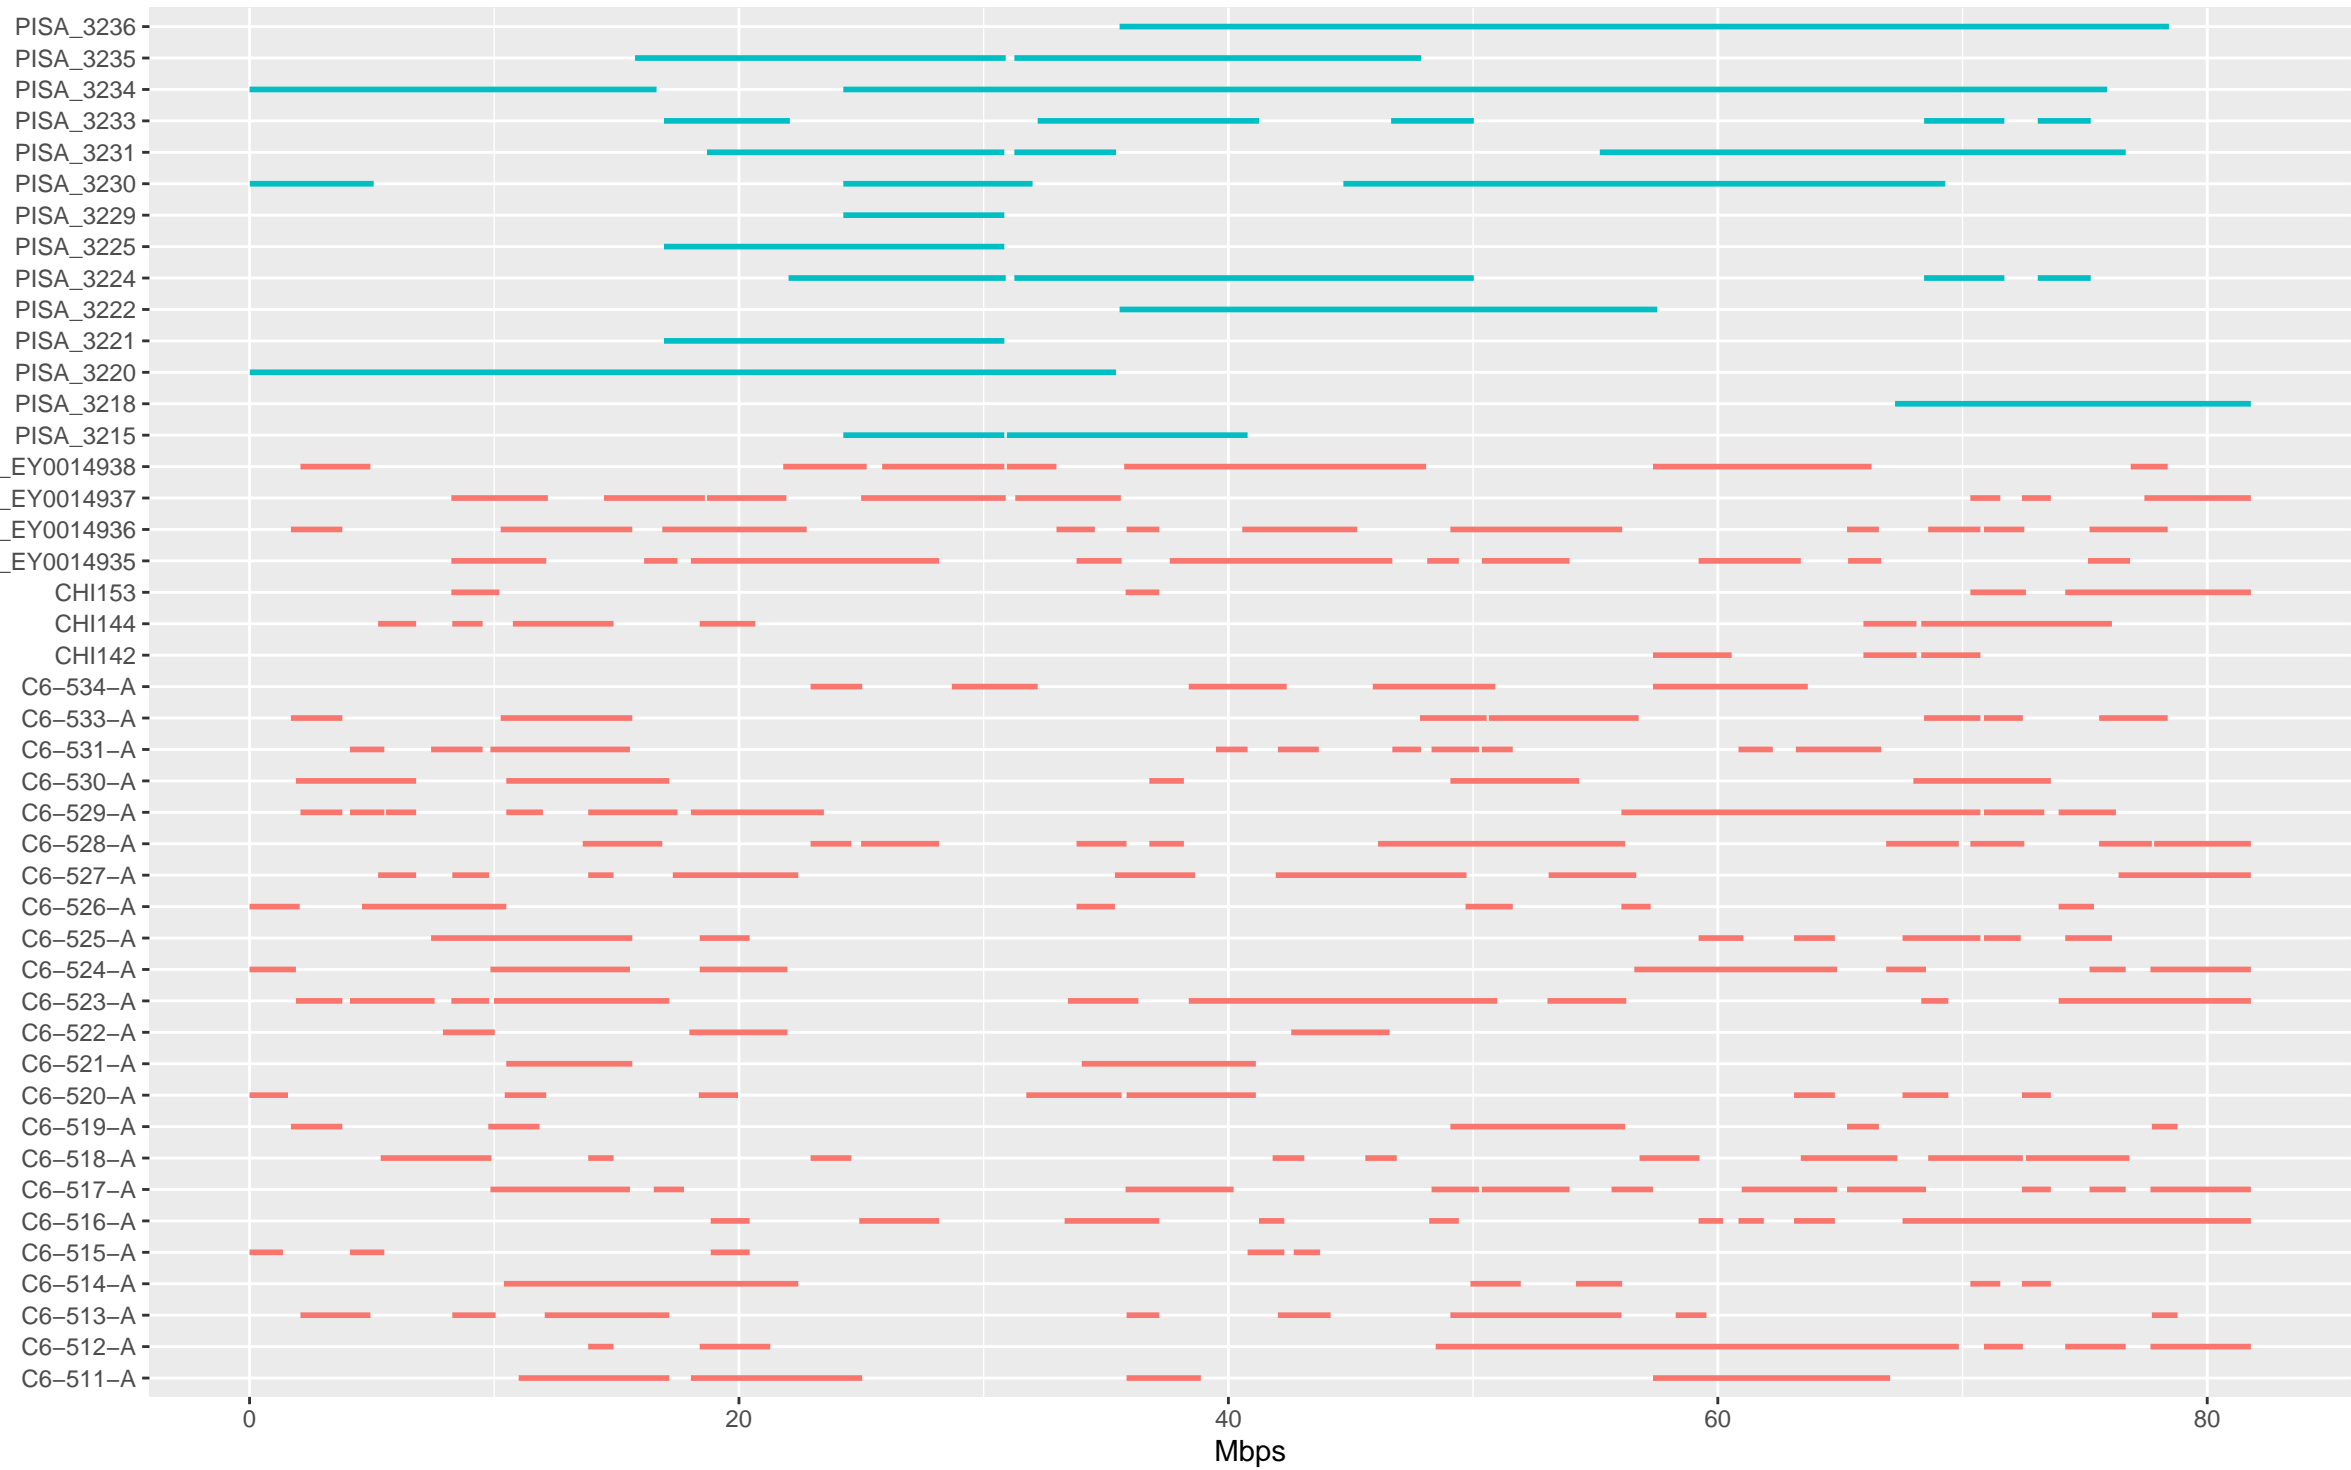

Chromosome 16

IDs

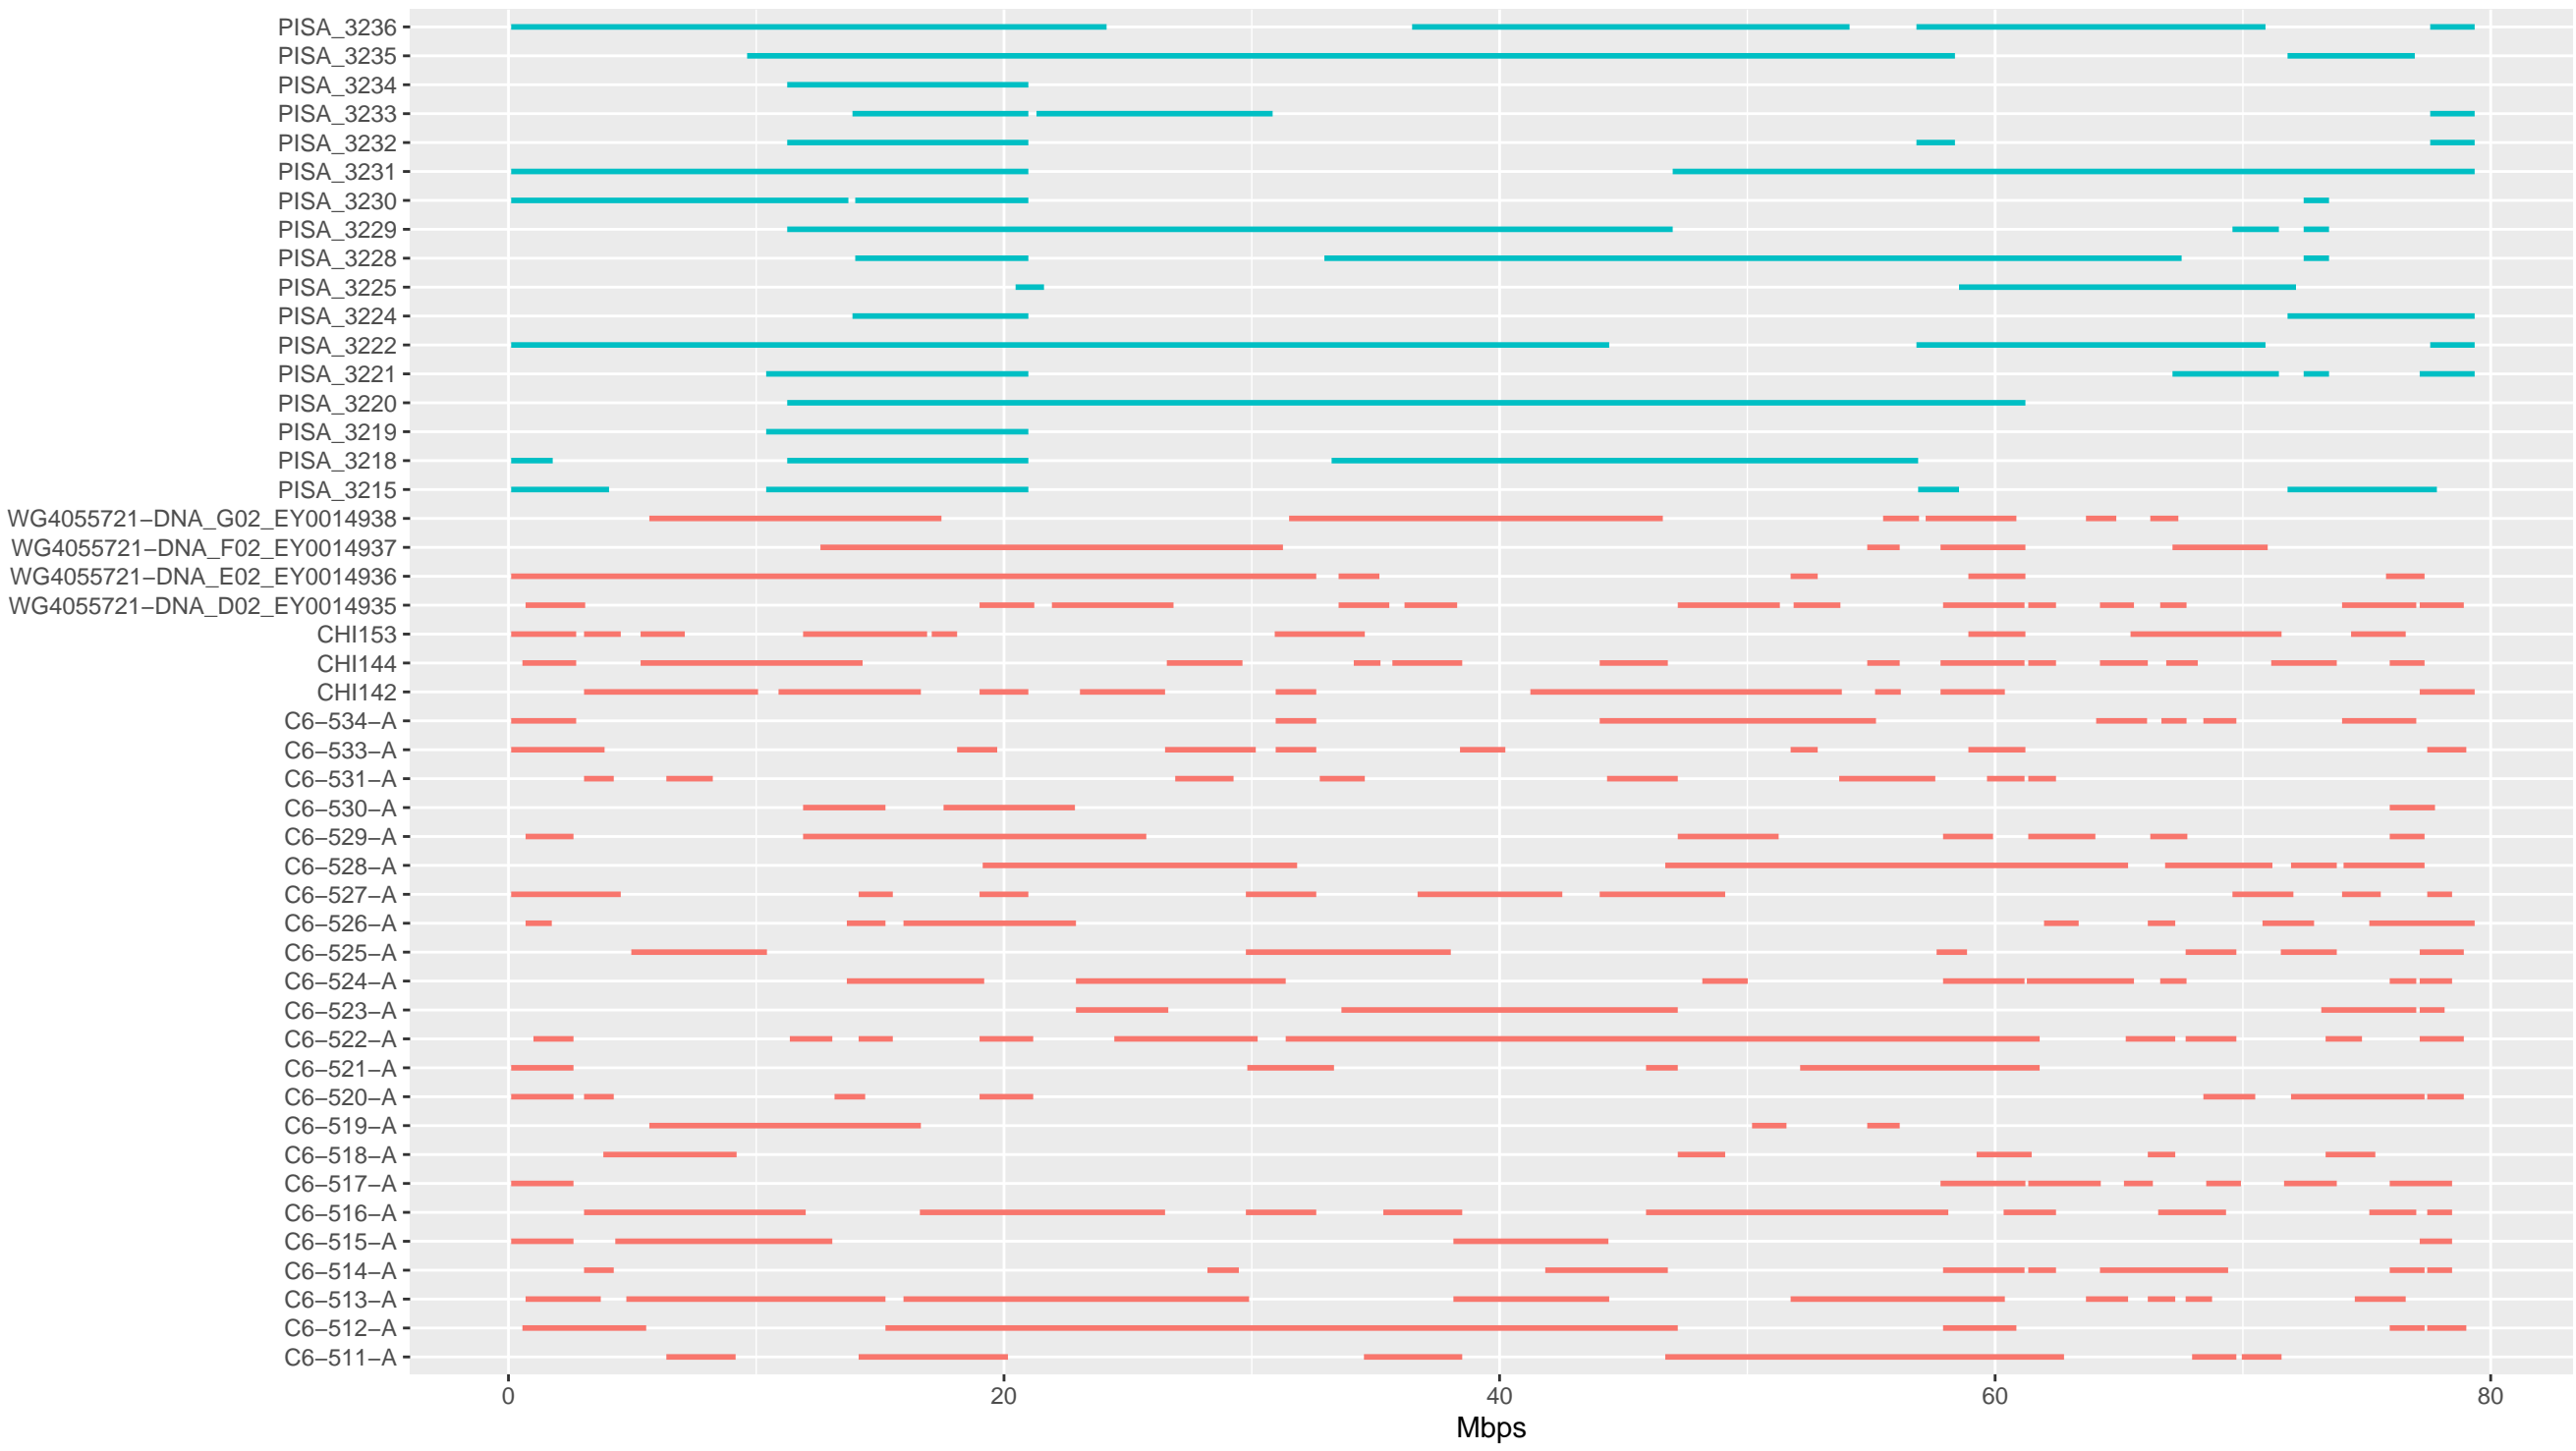

Population

- MNT\_I
- MNT\_M



Chromosome 17

IDs

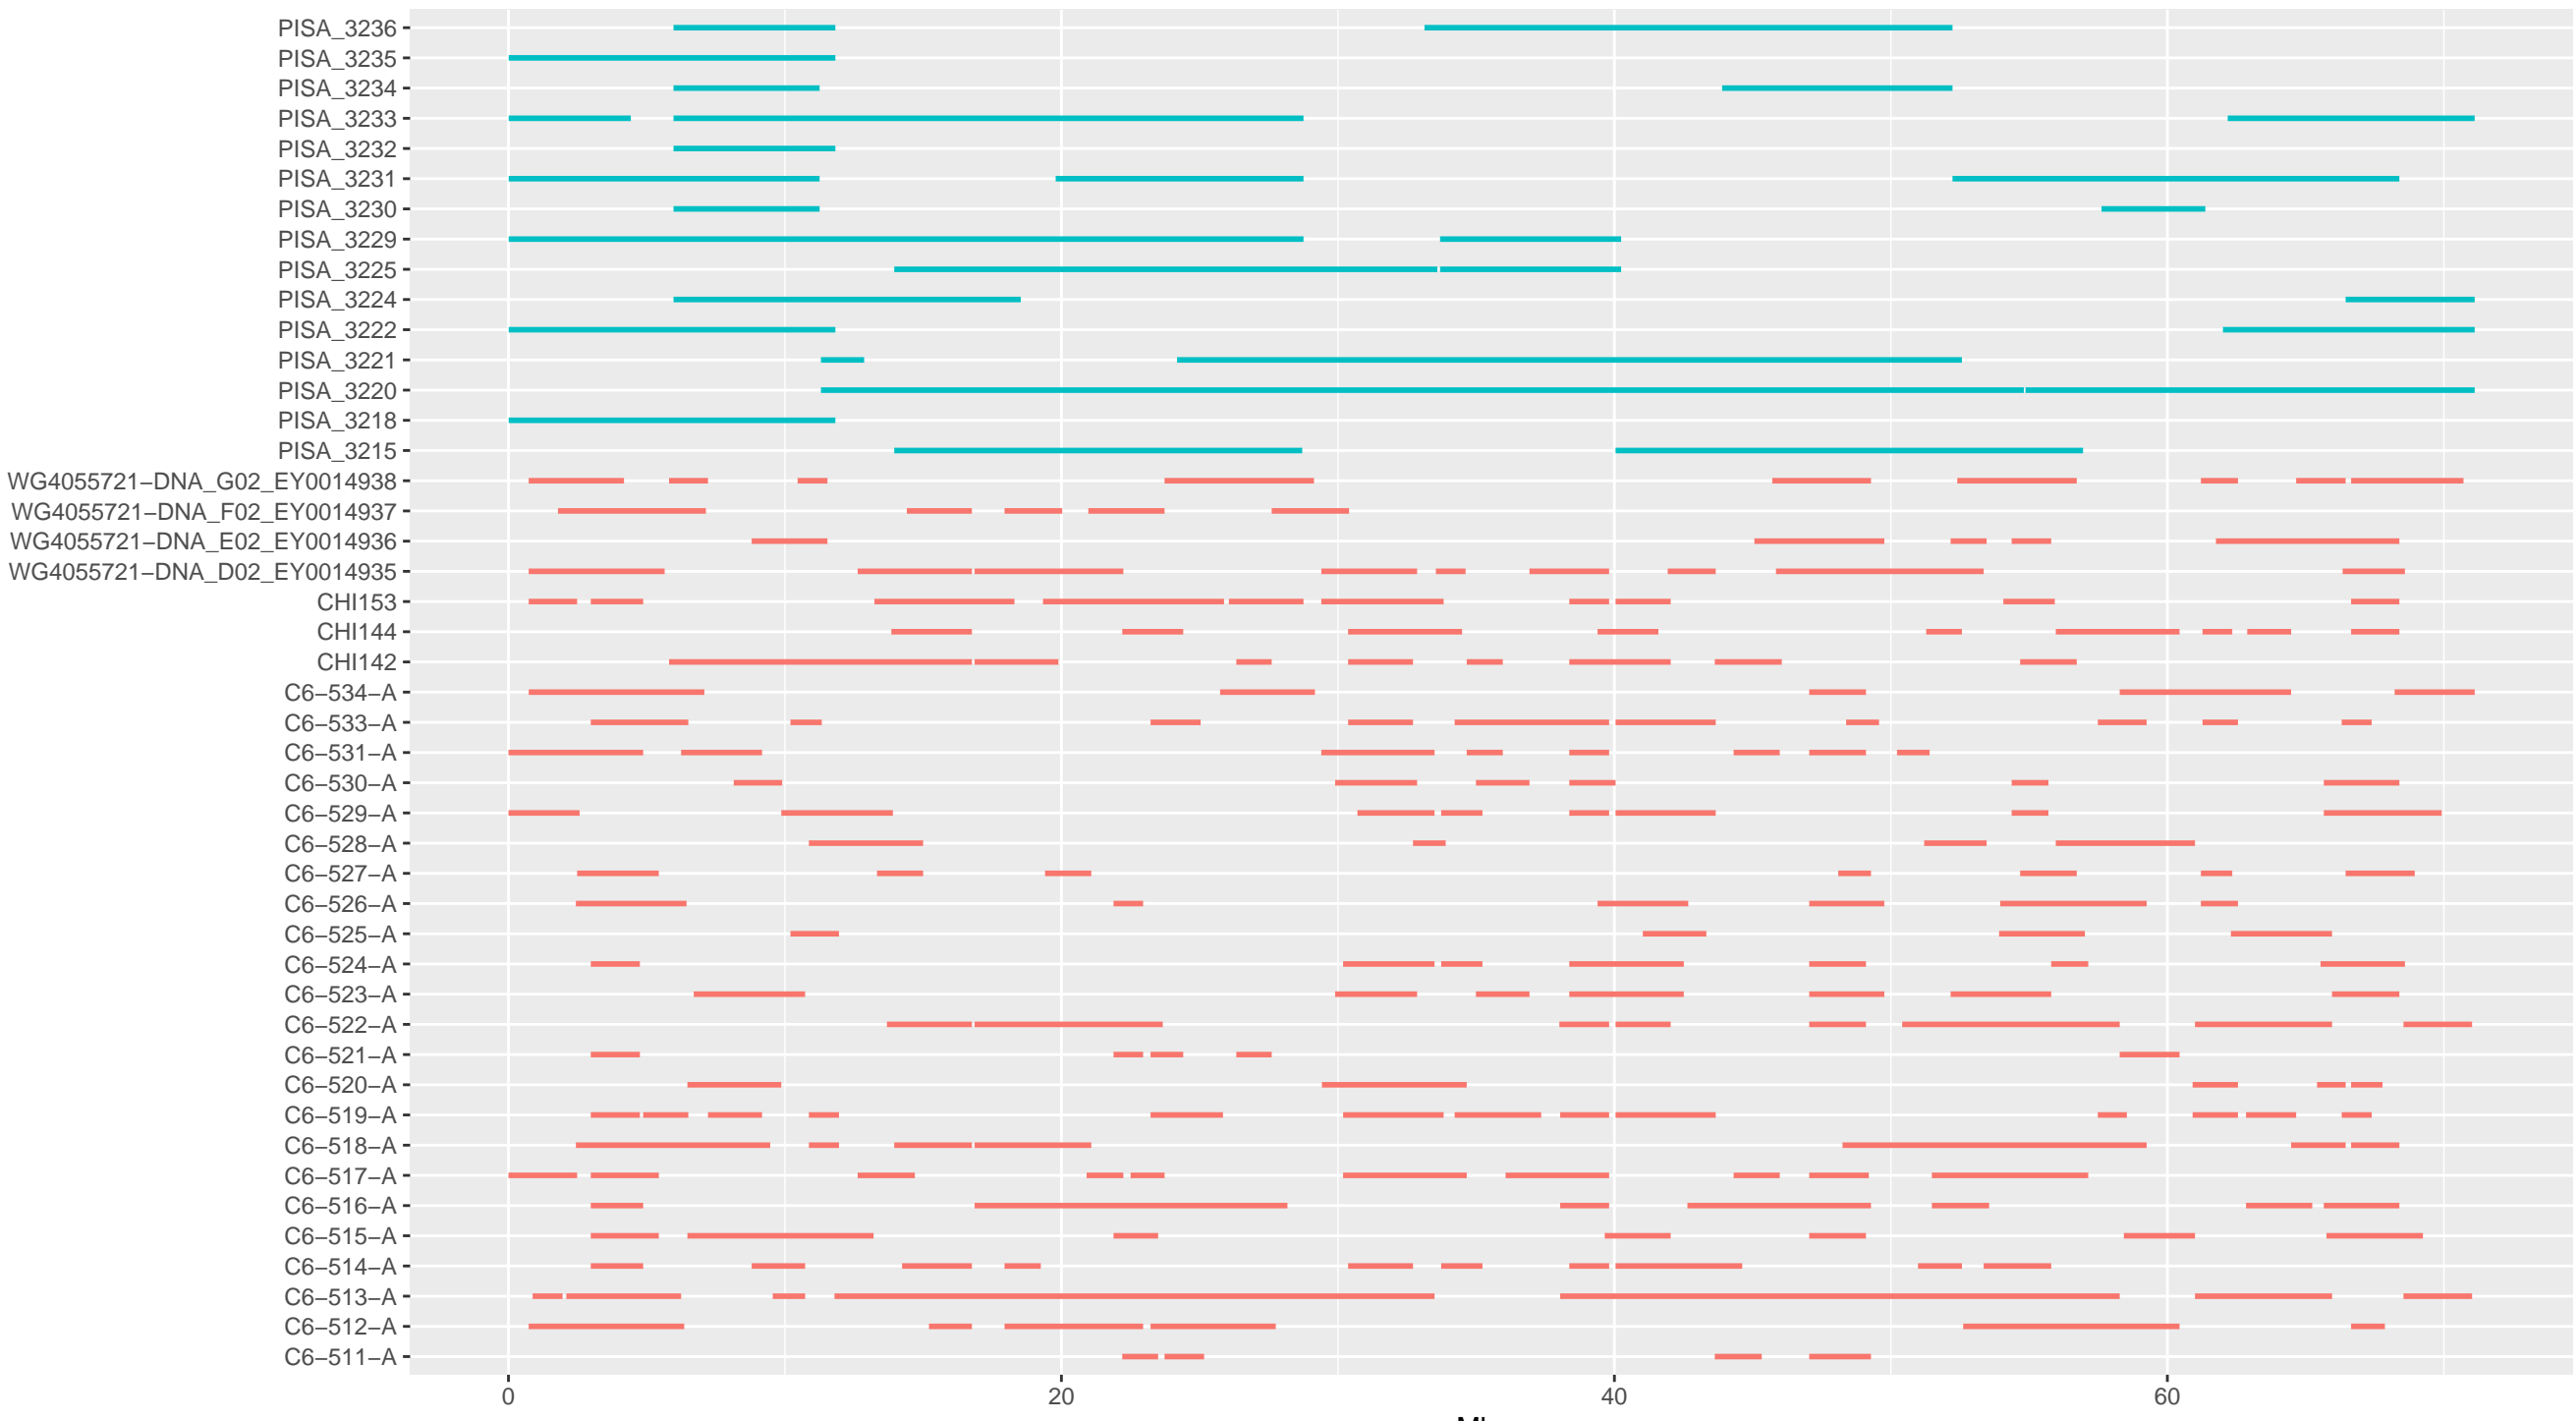

Population

- MNT\_I
- MNT\_M

Chromosome 18

IDs

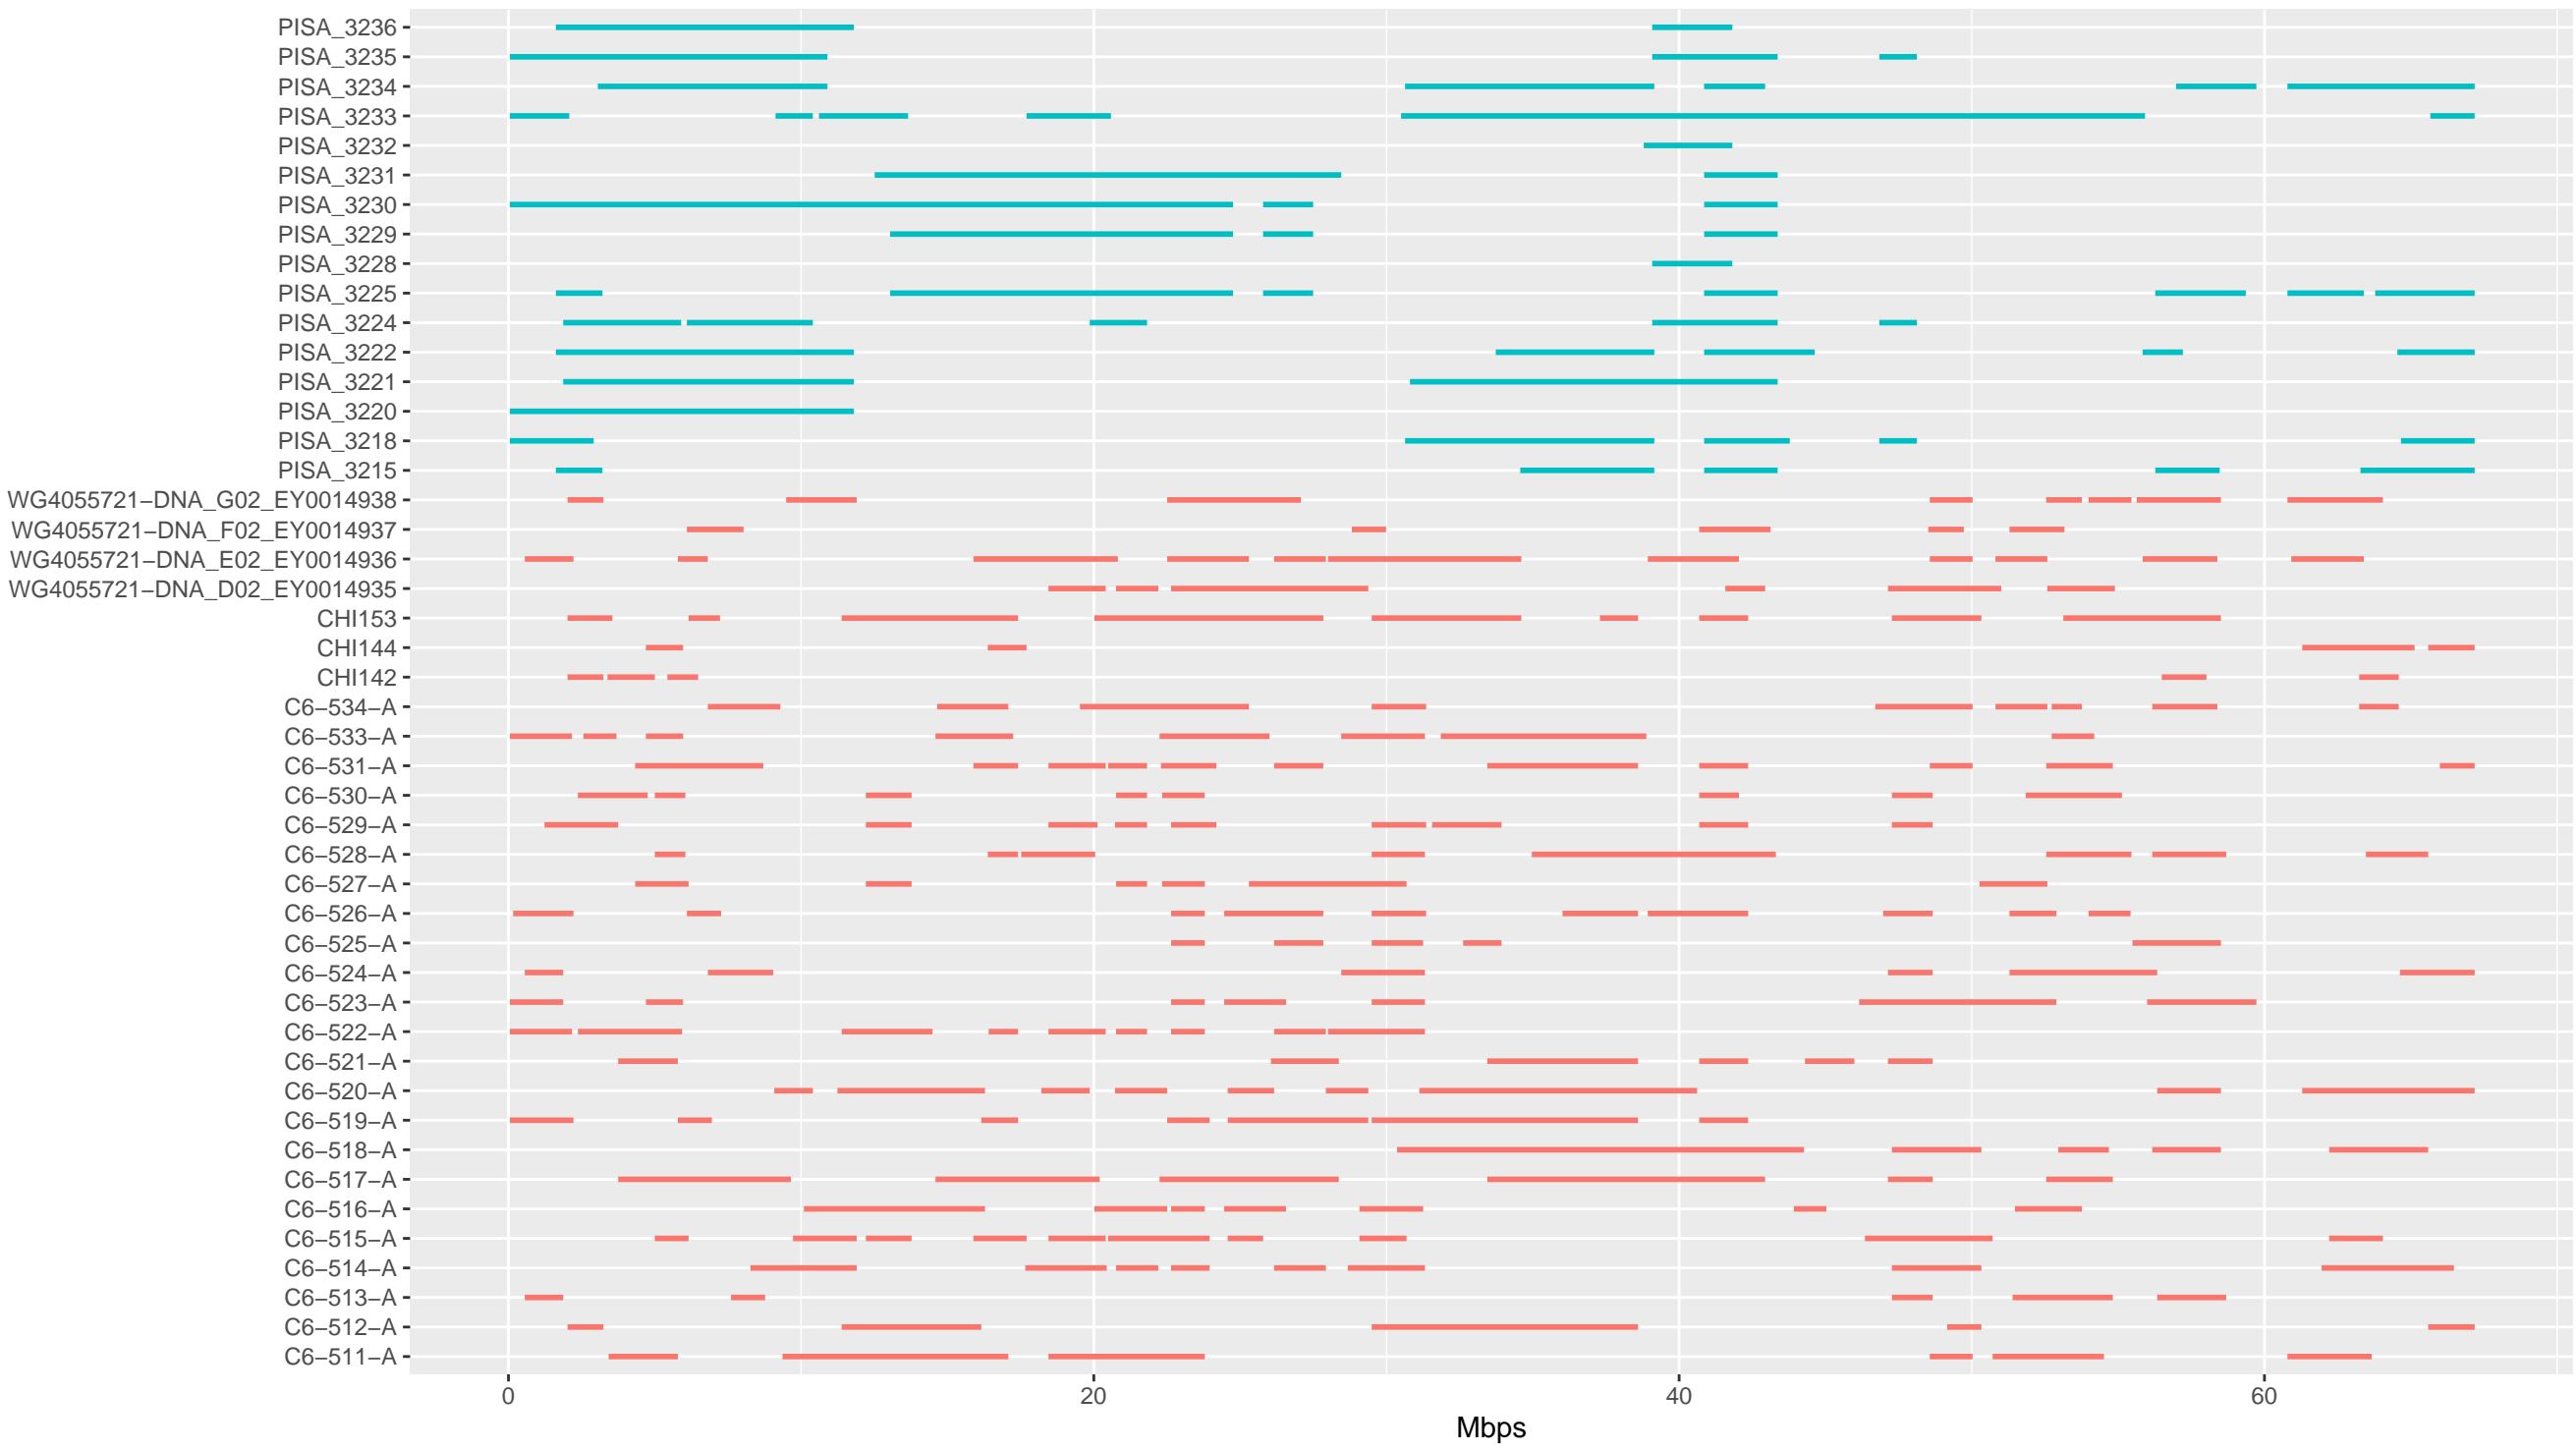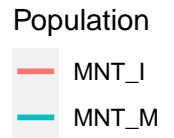

Chromosome 19

IDs

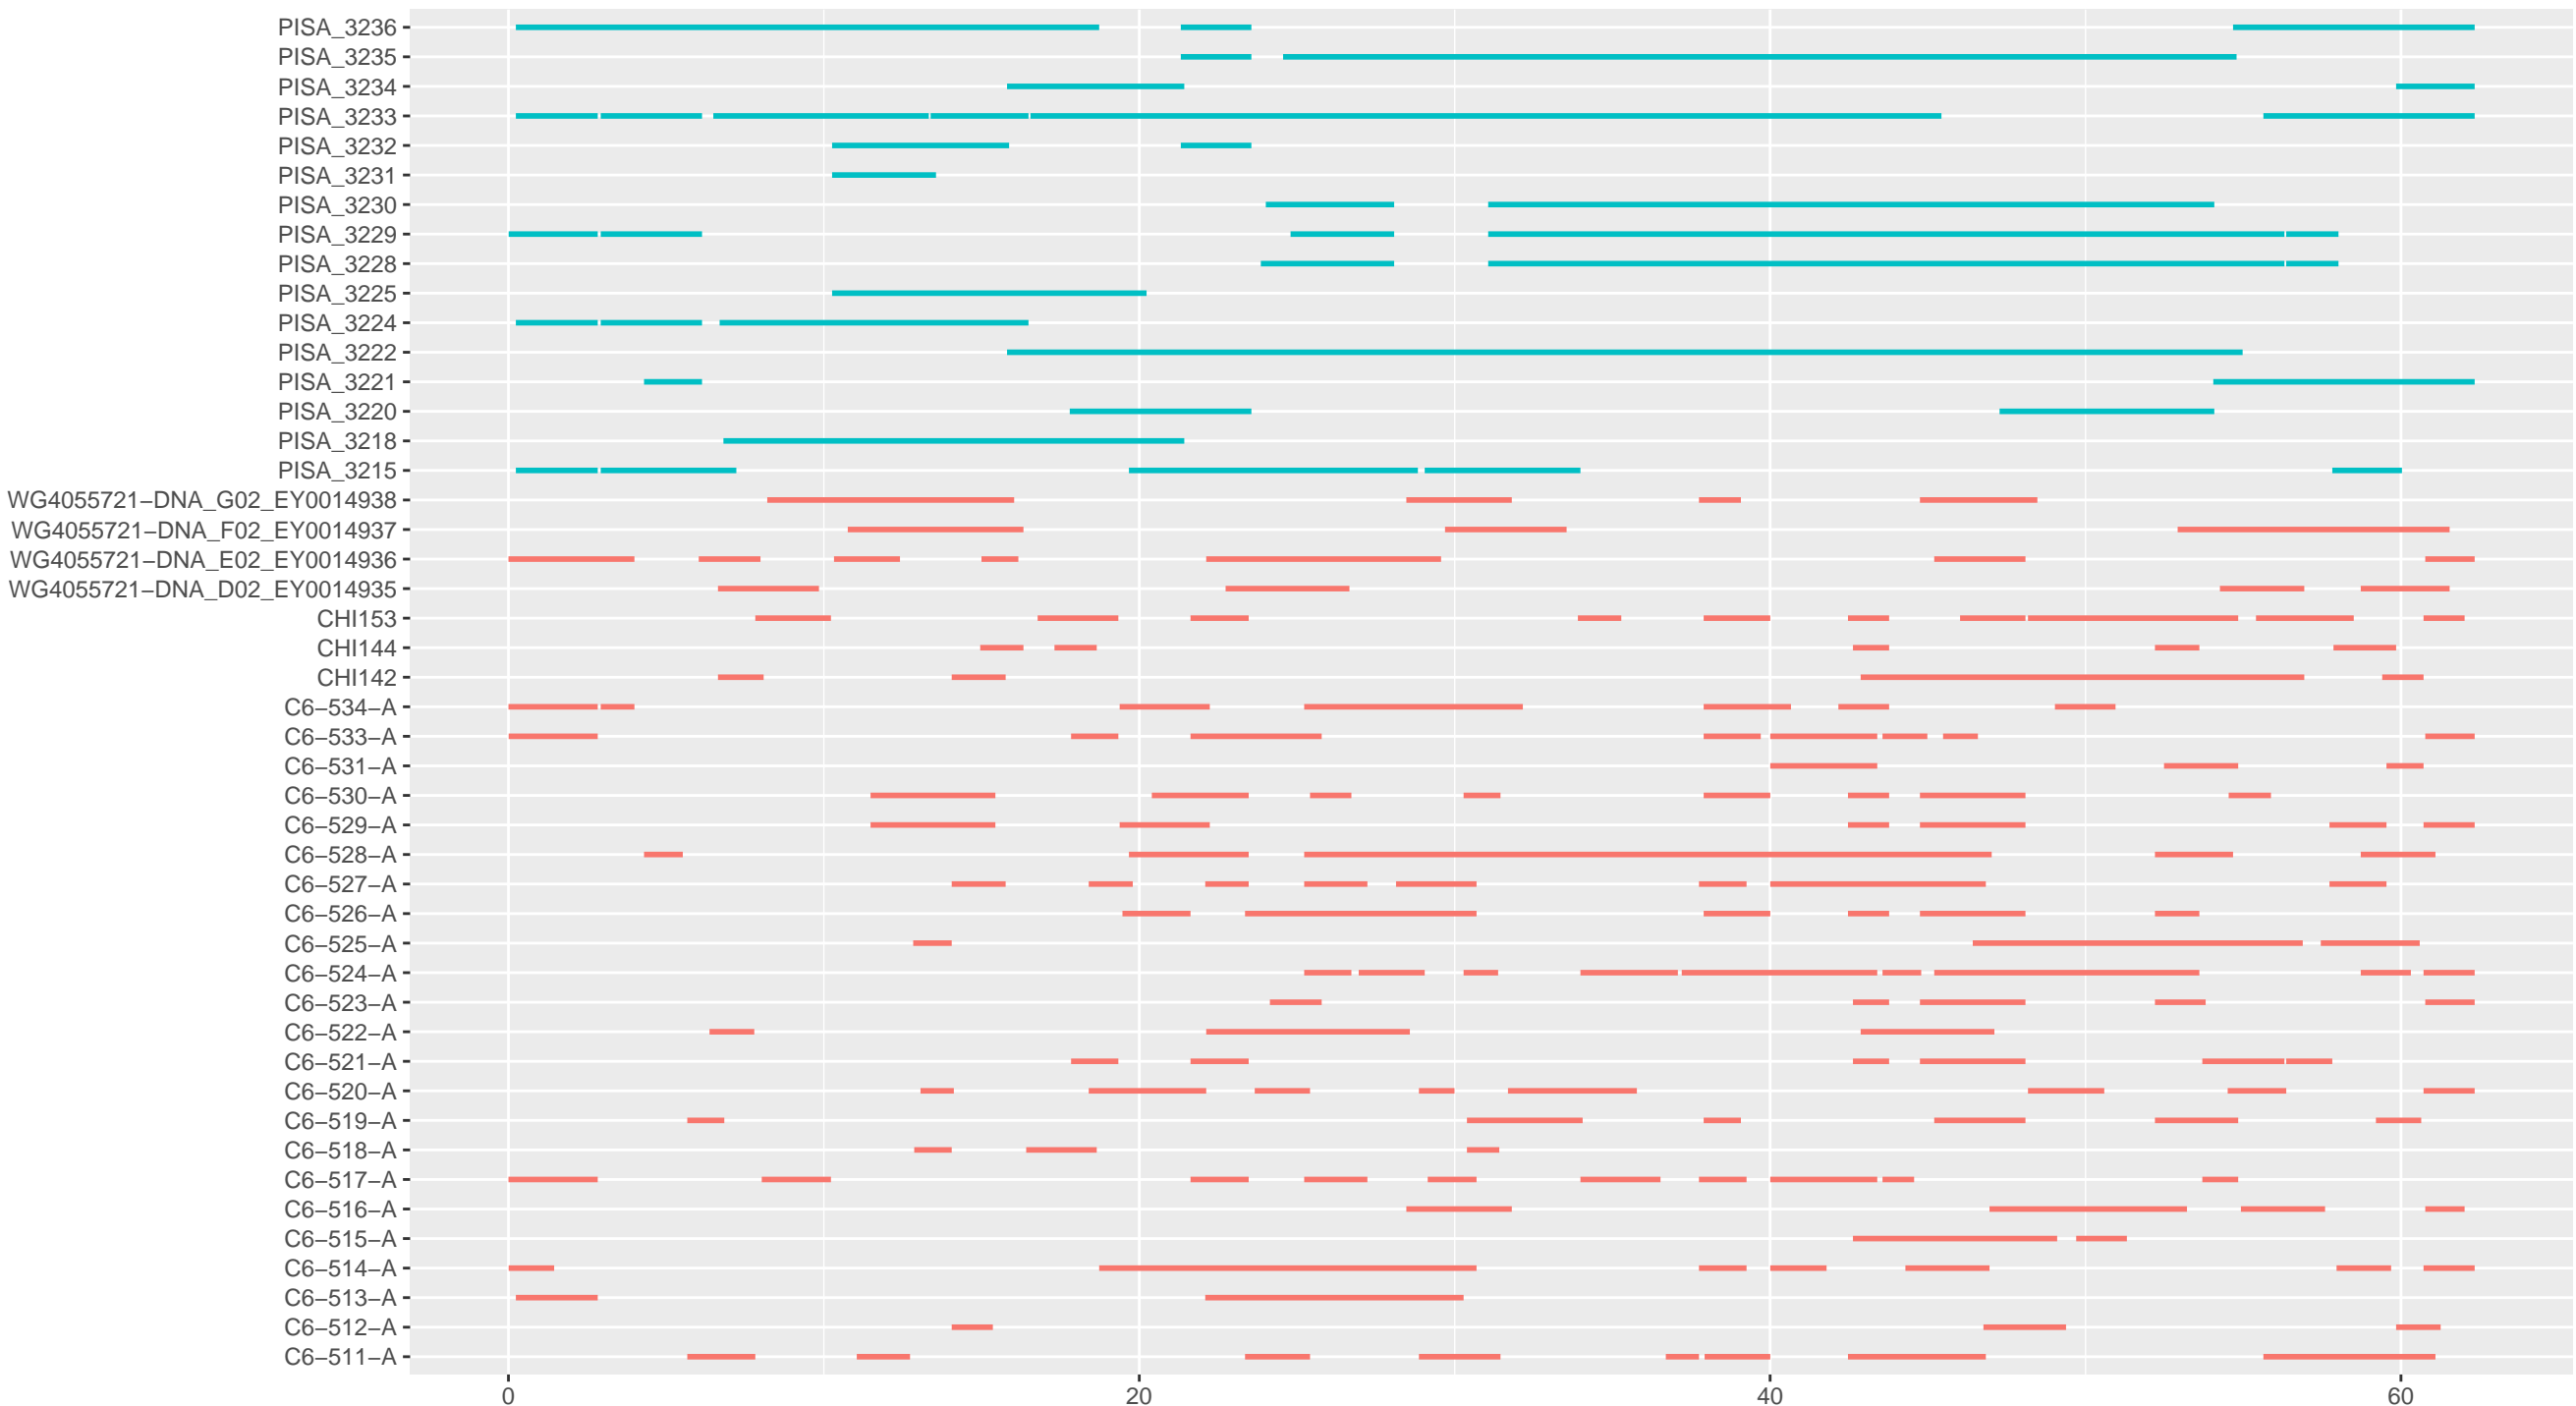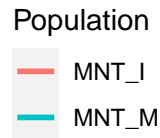

# Chromosome 20

IDs

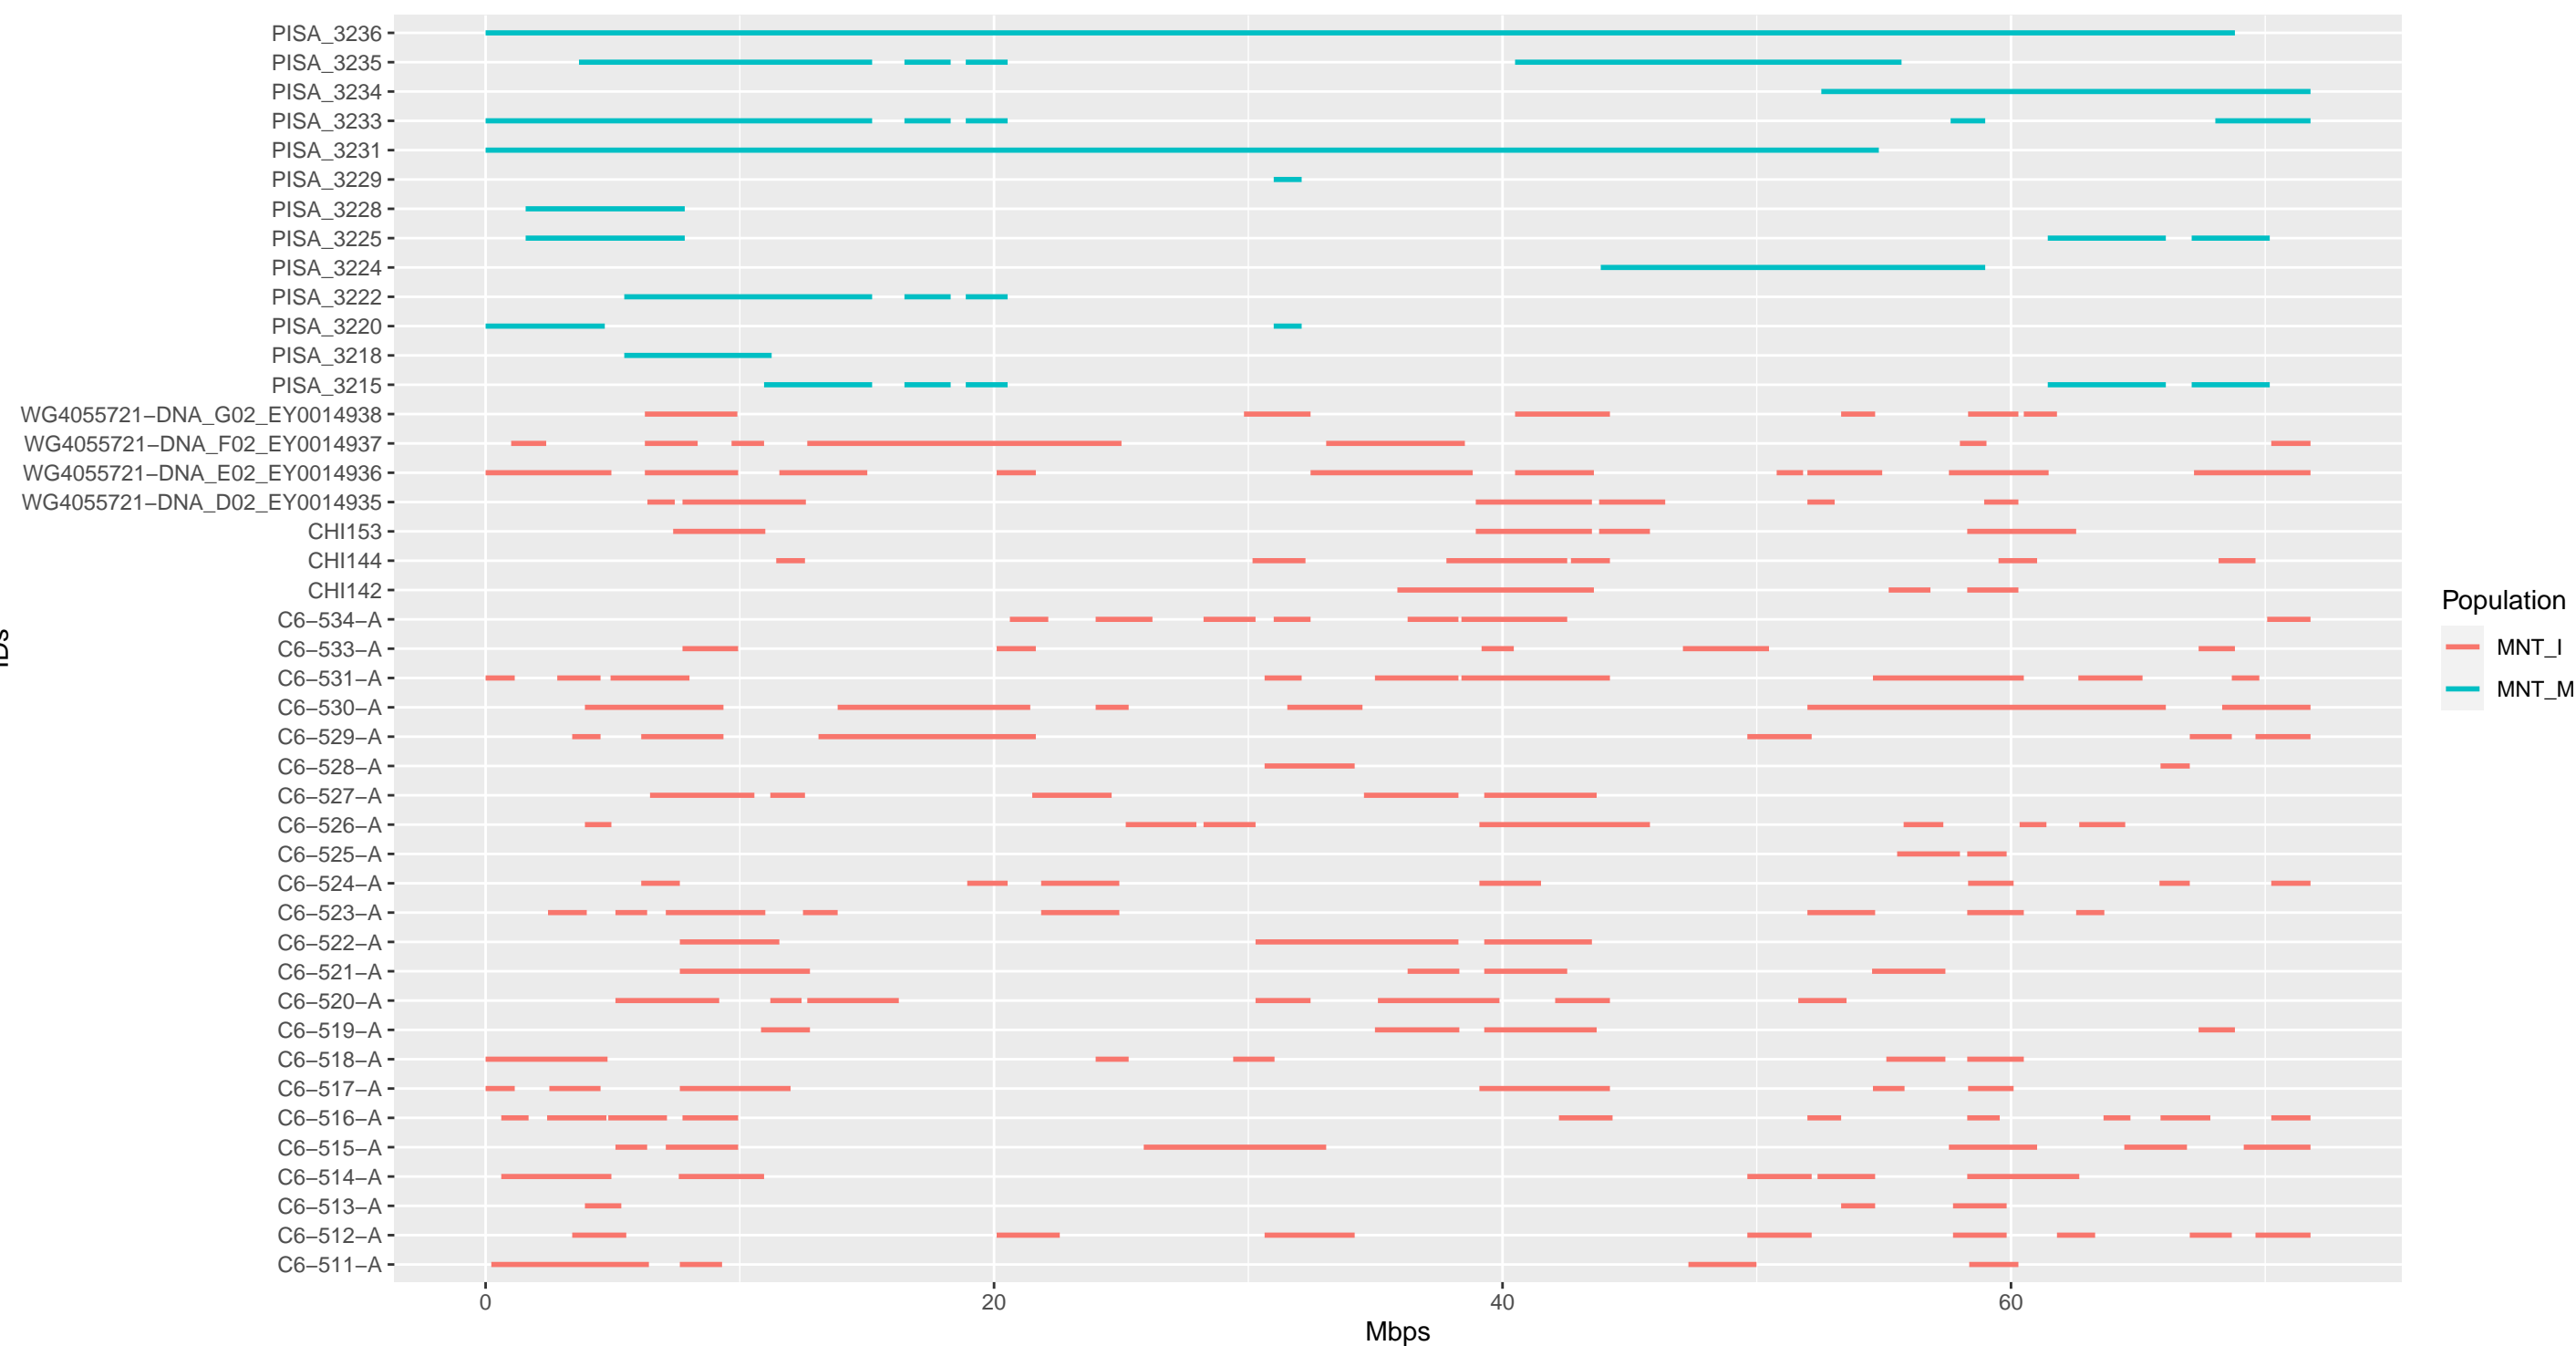

Chromosome 21

IDs

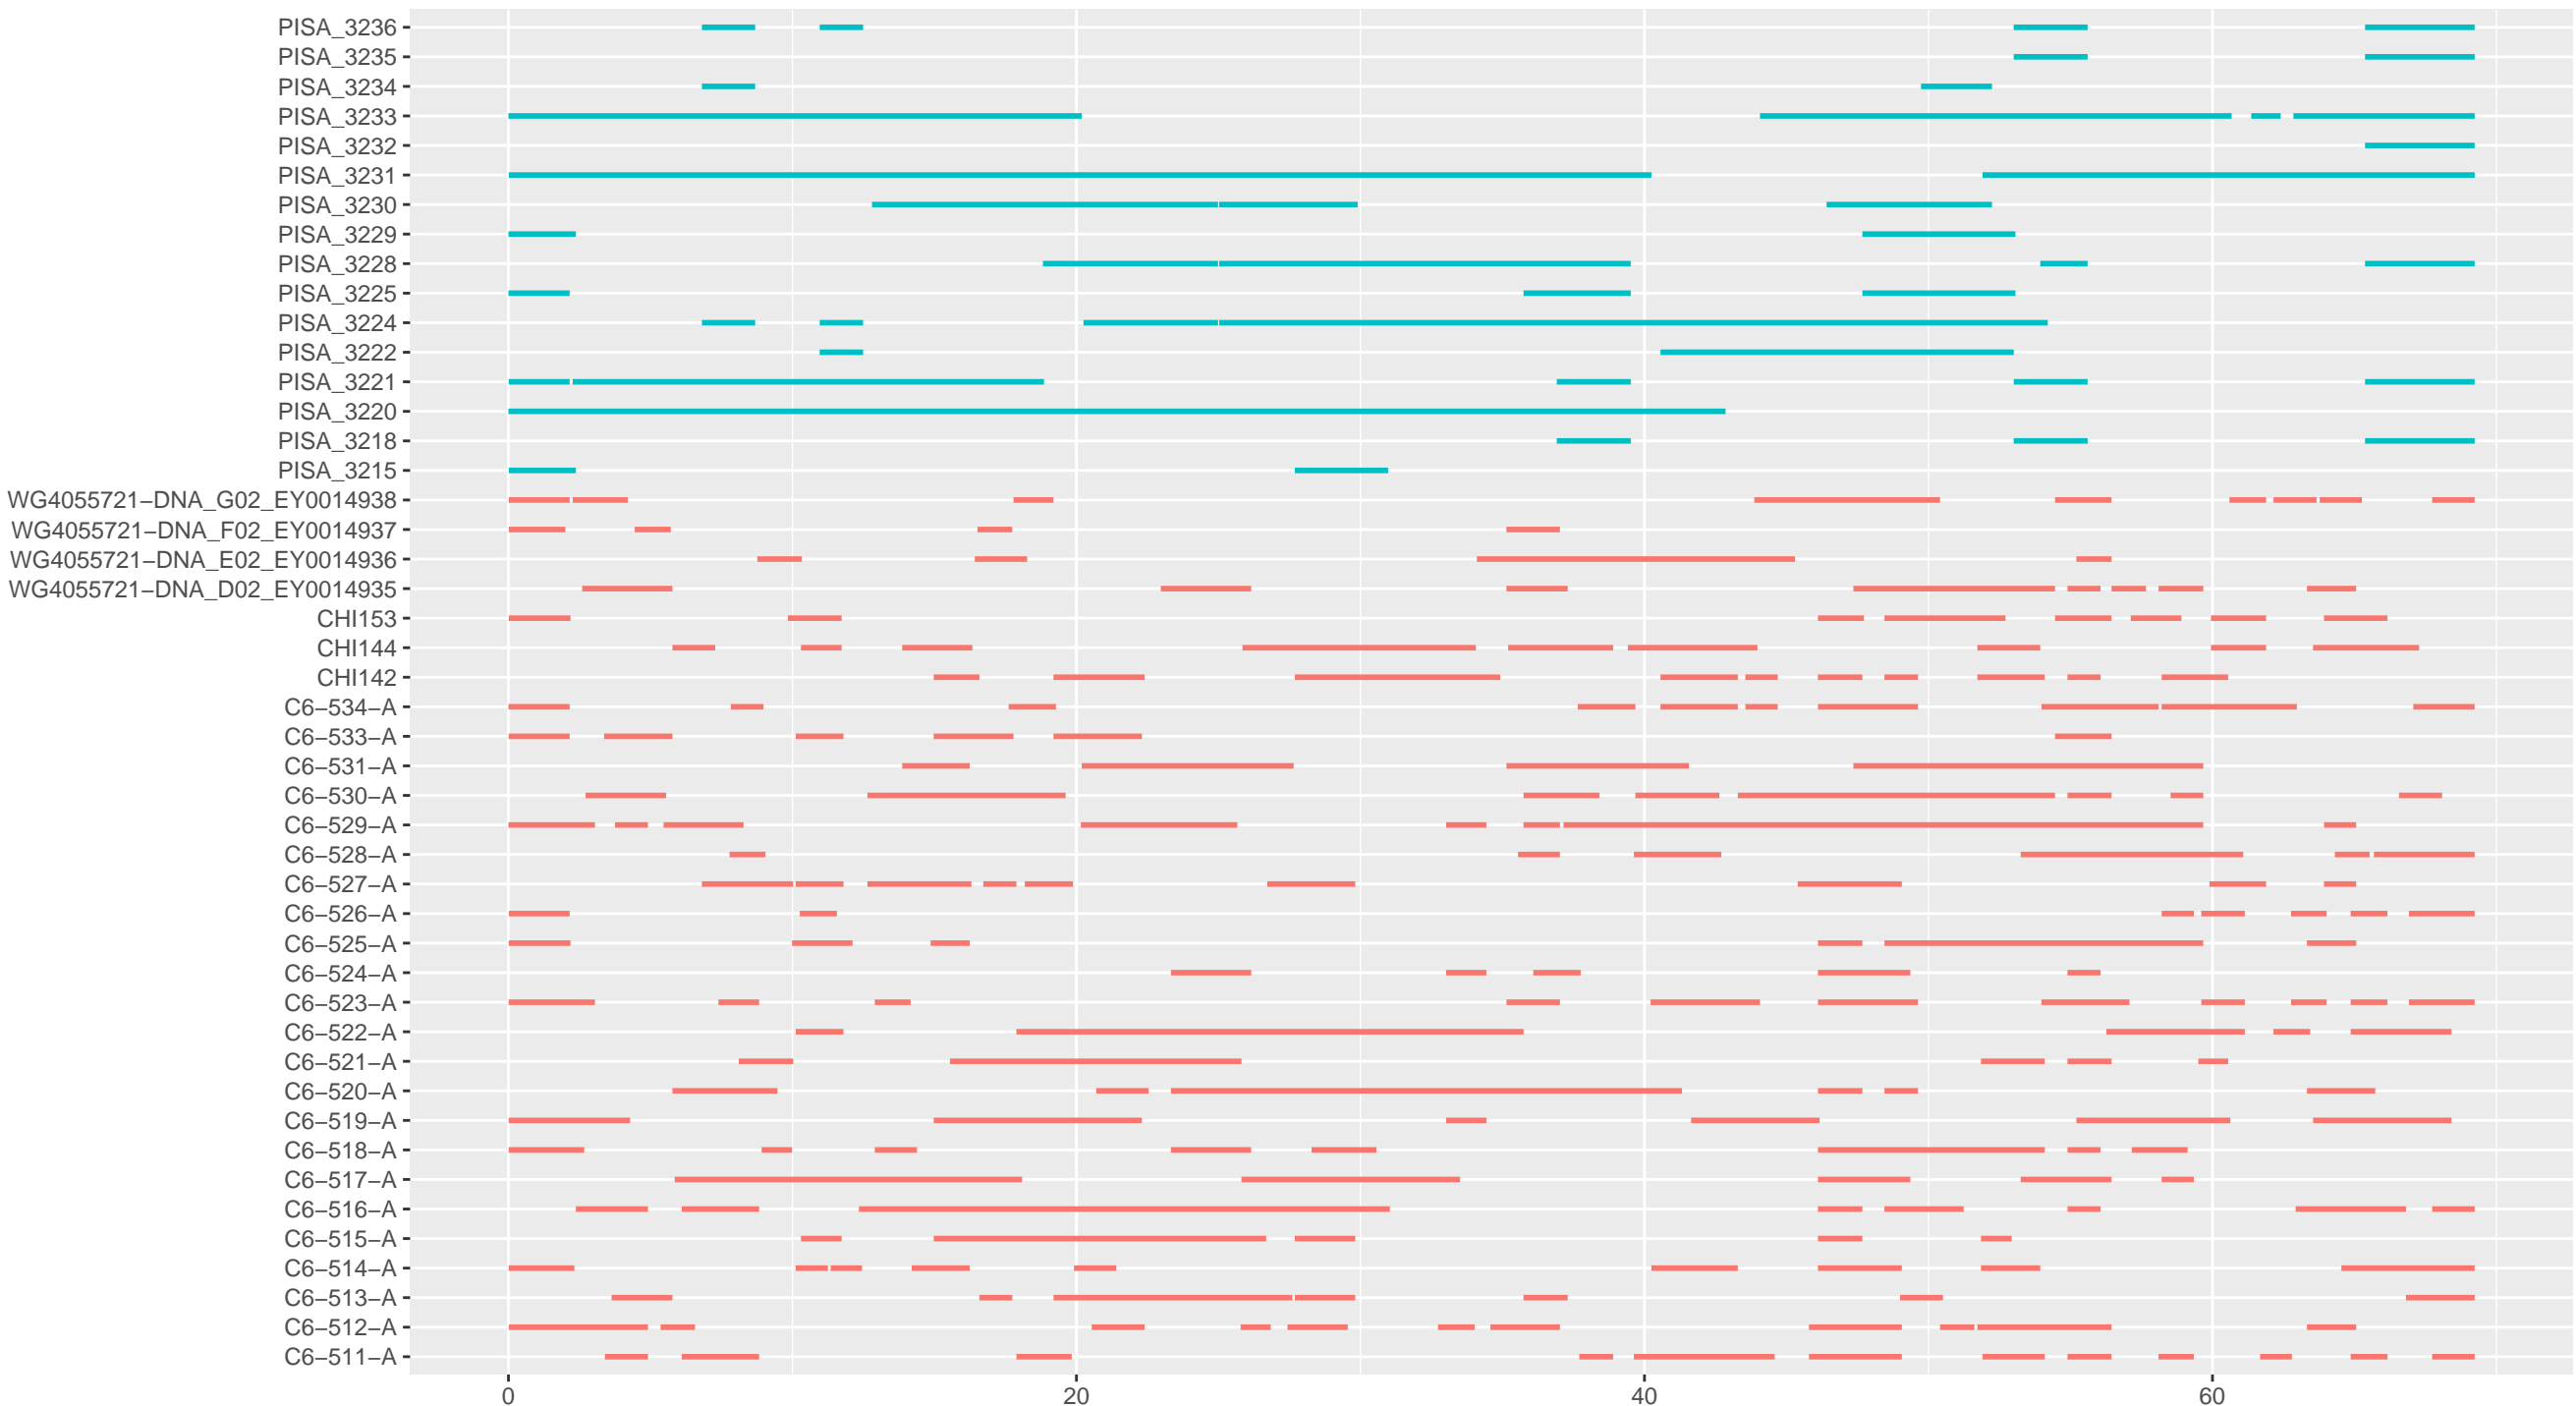

Mbps

Chromosome 22

IDs

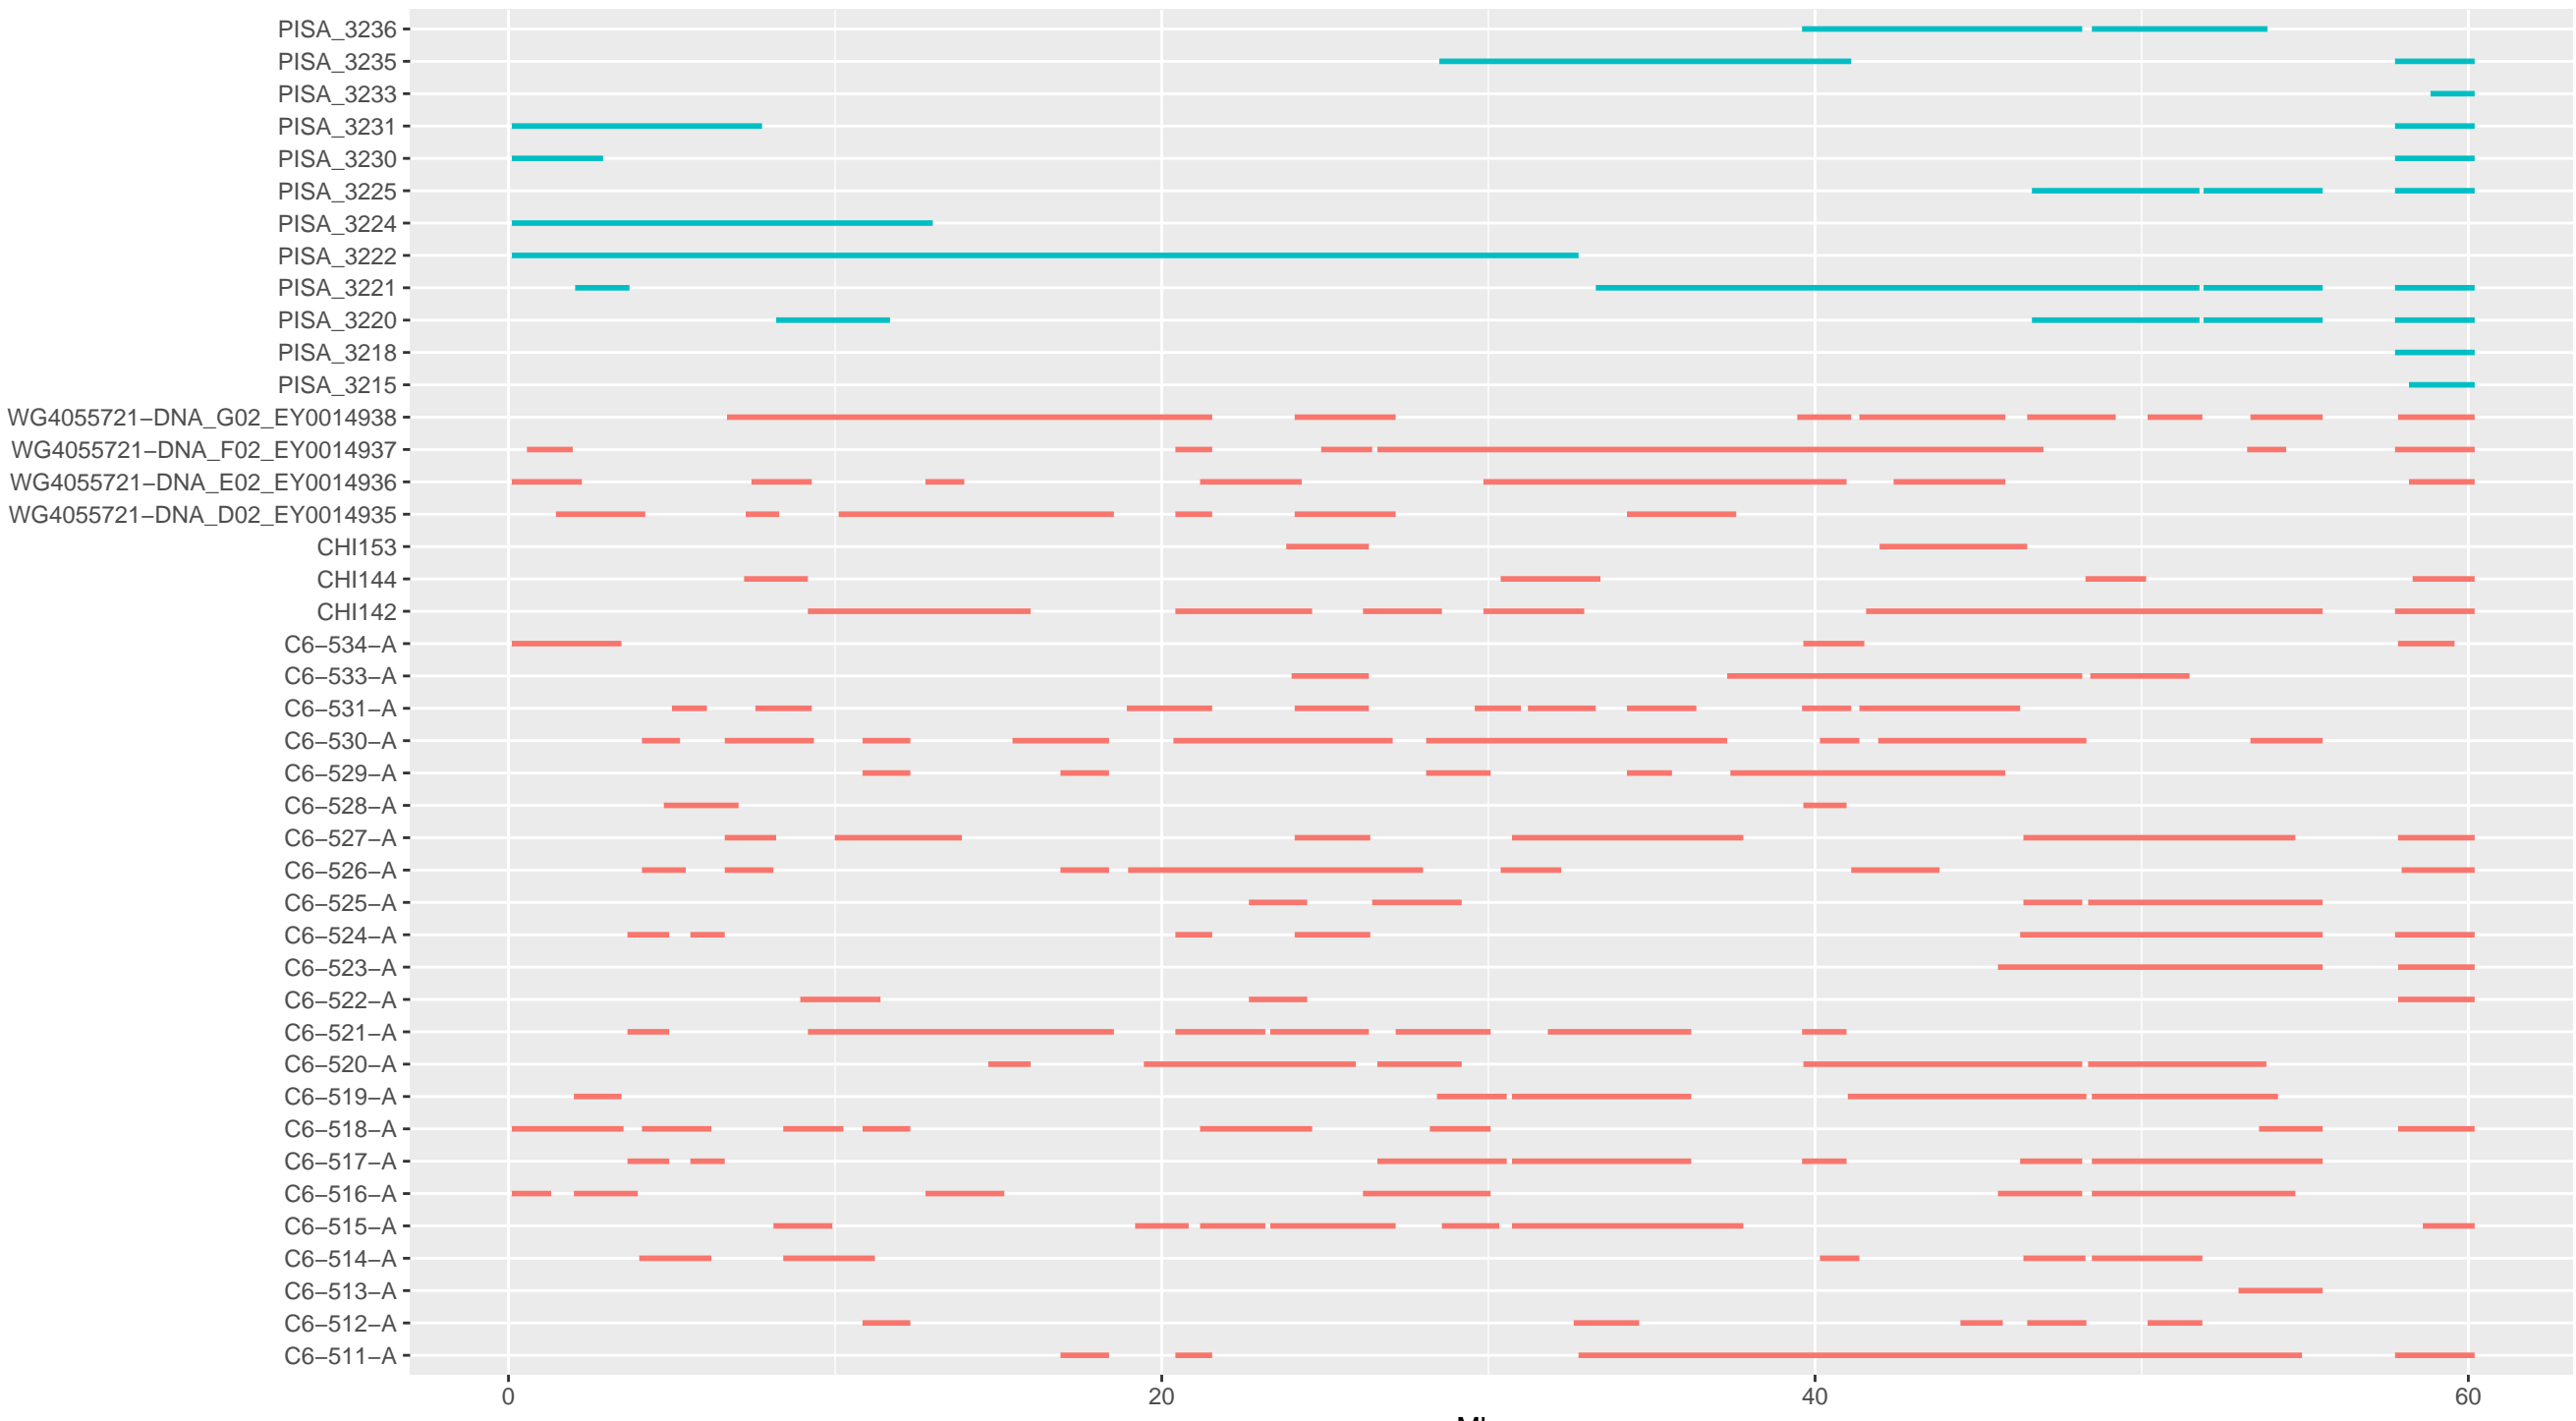

Population

- MNT\_I
- MNT\_M

Chromosome 23

IDs

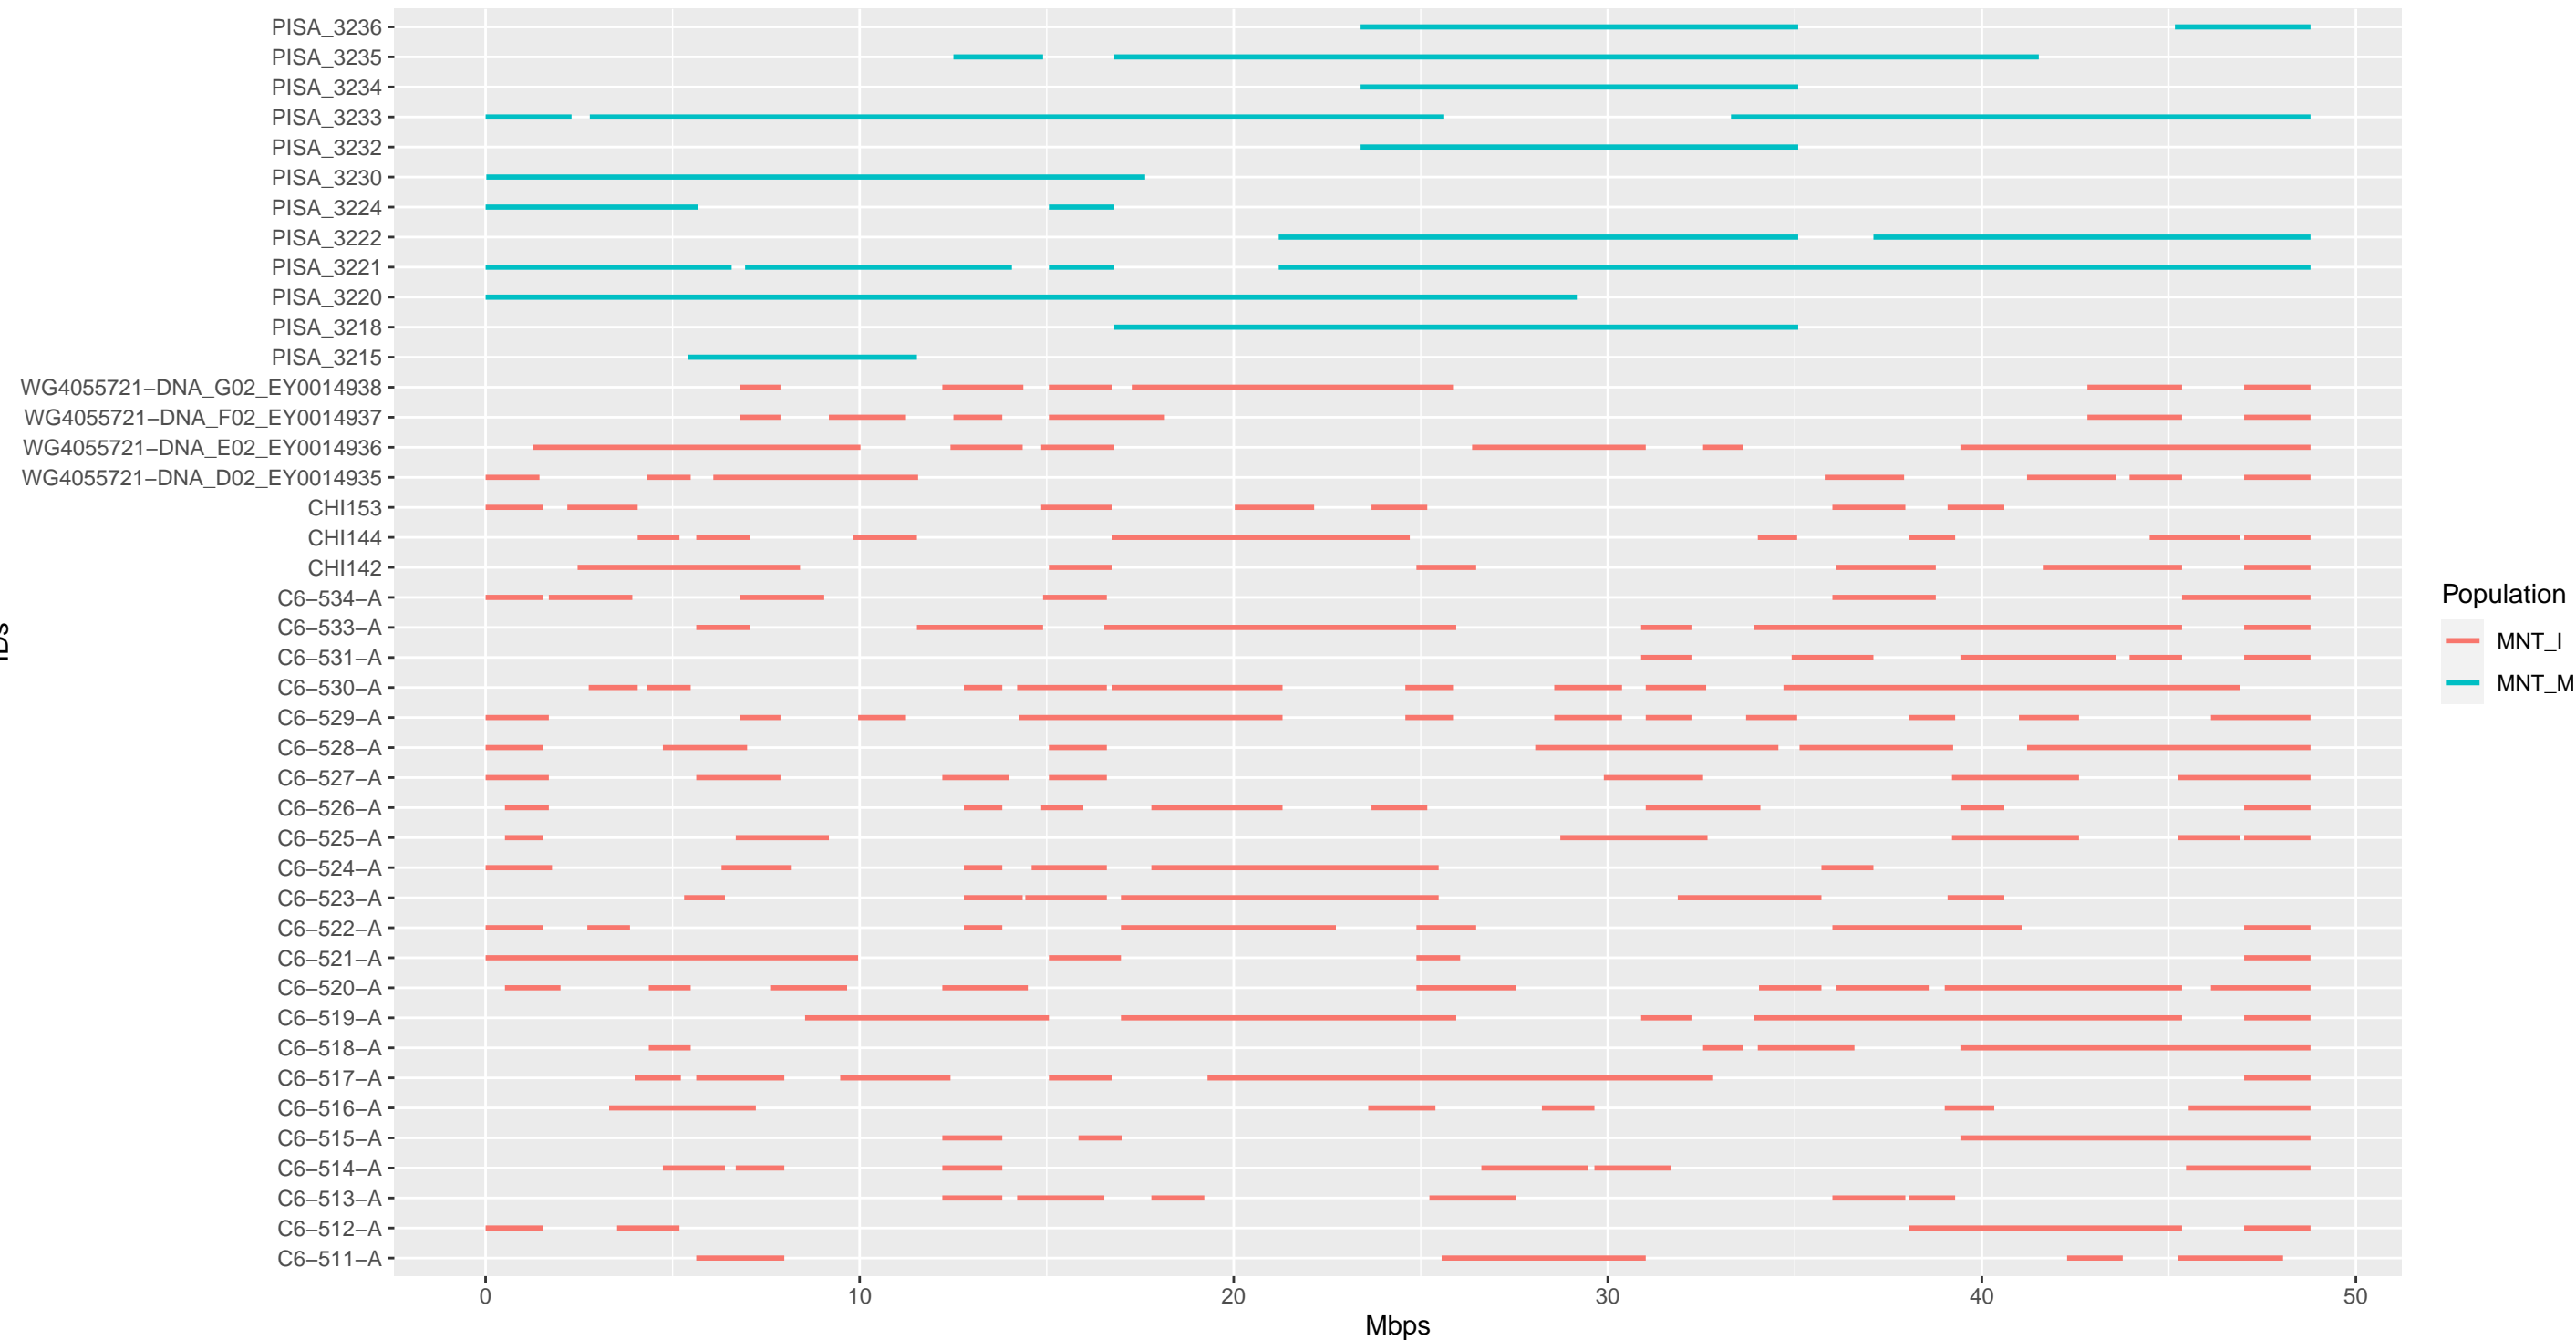

Chromosome 24

IDs

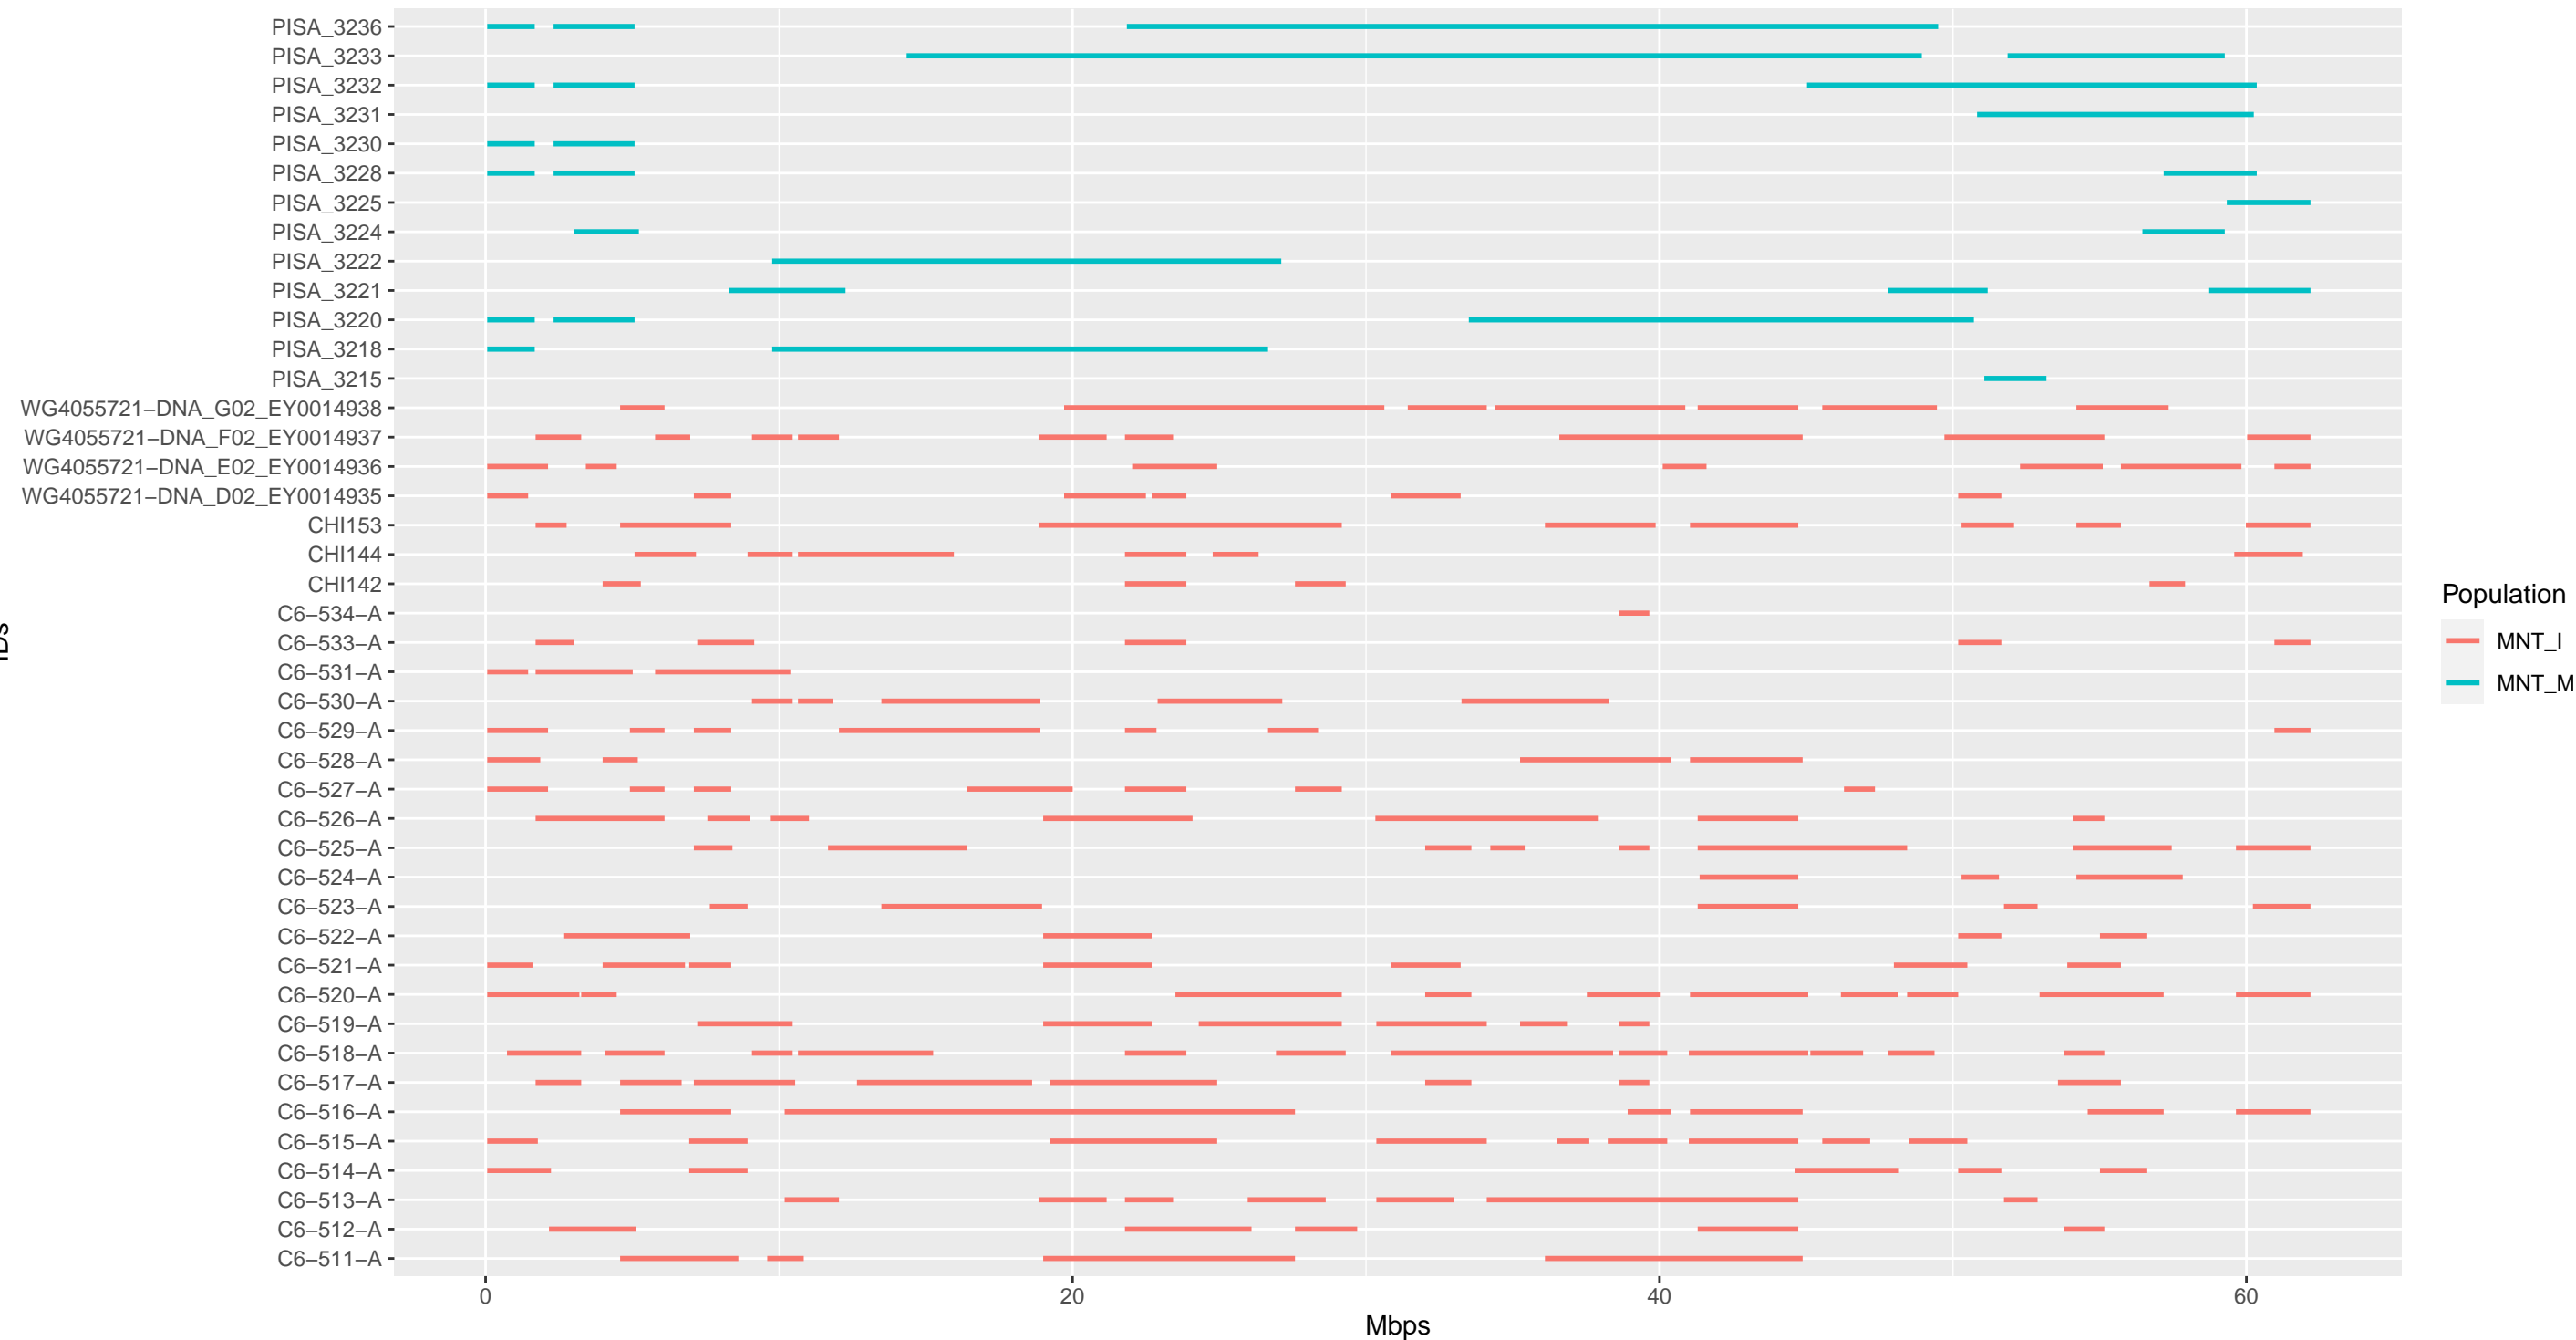



## Chromosome 25

IDs

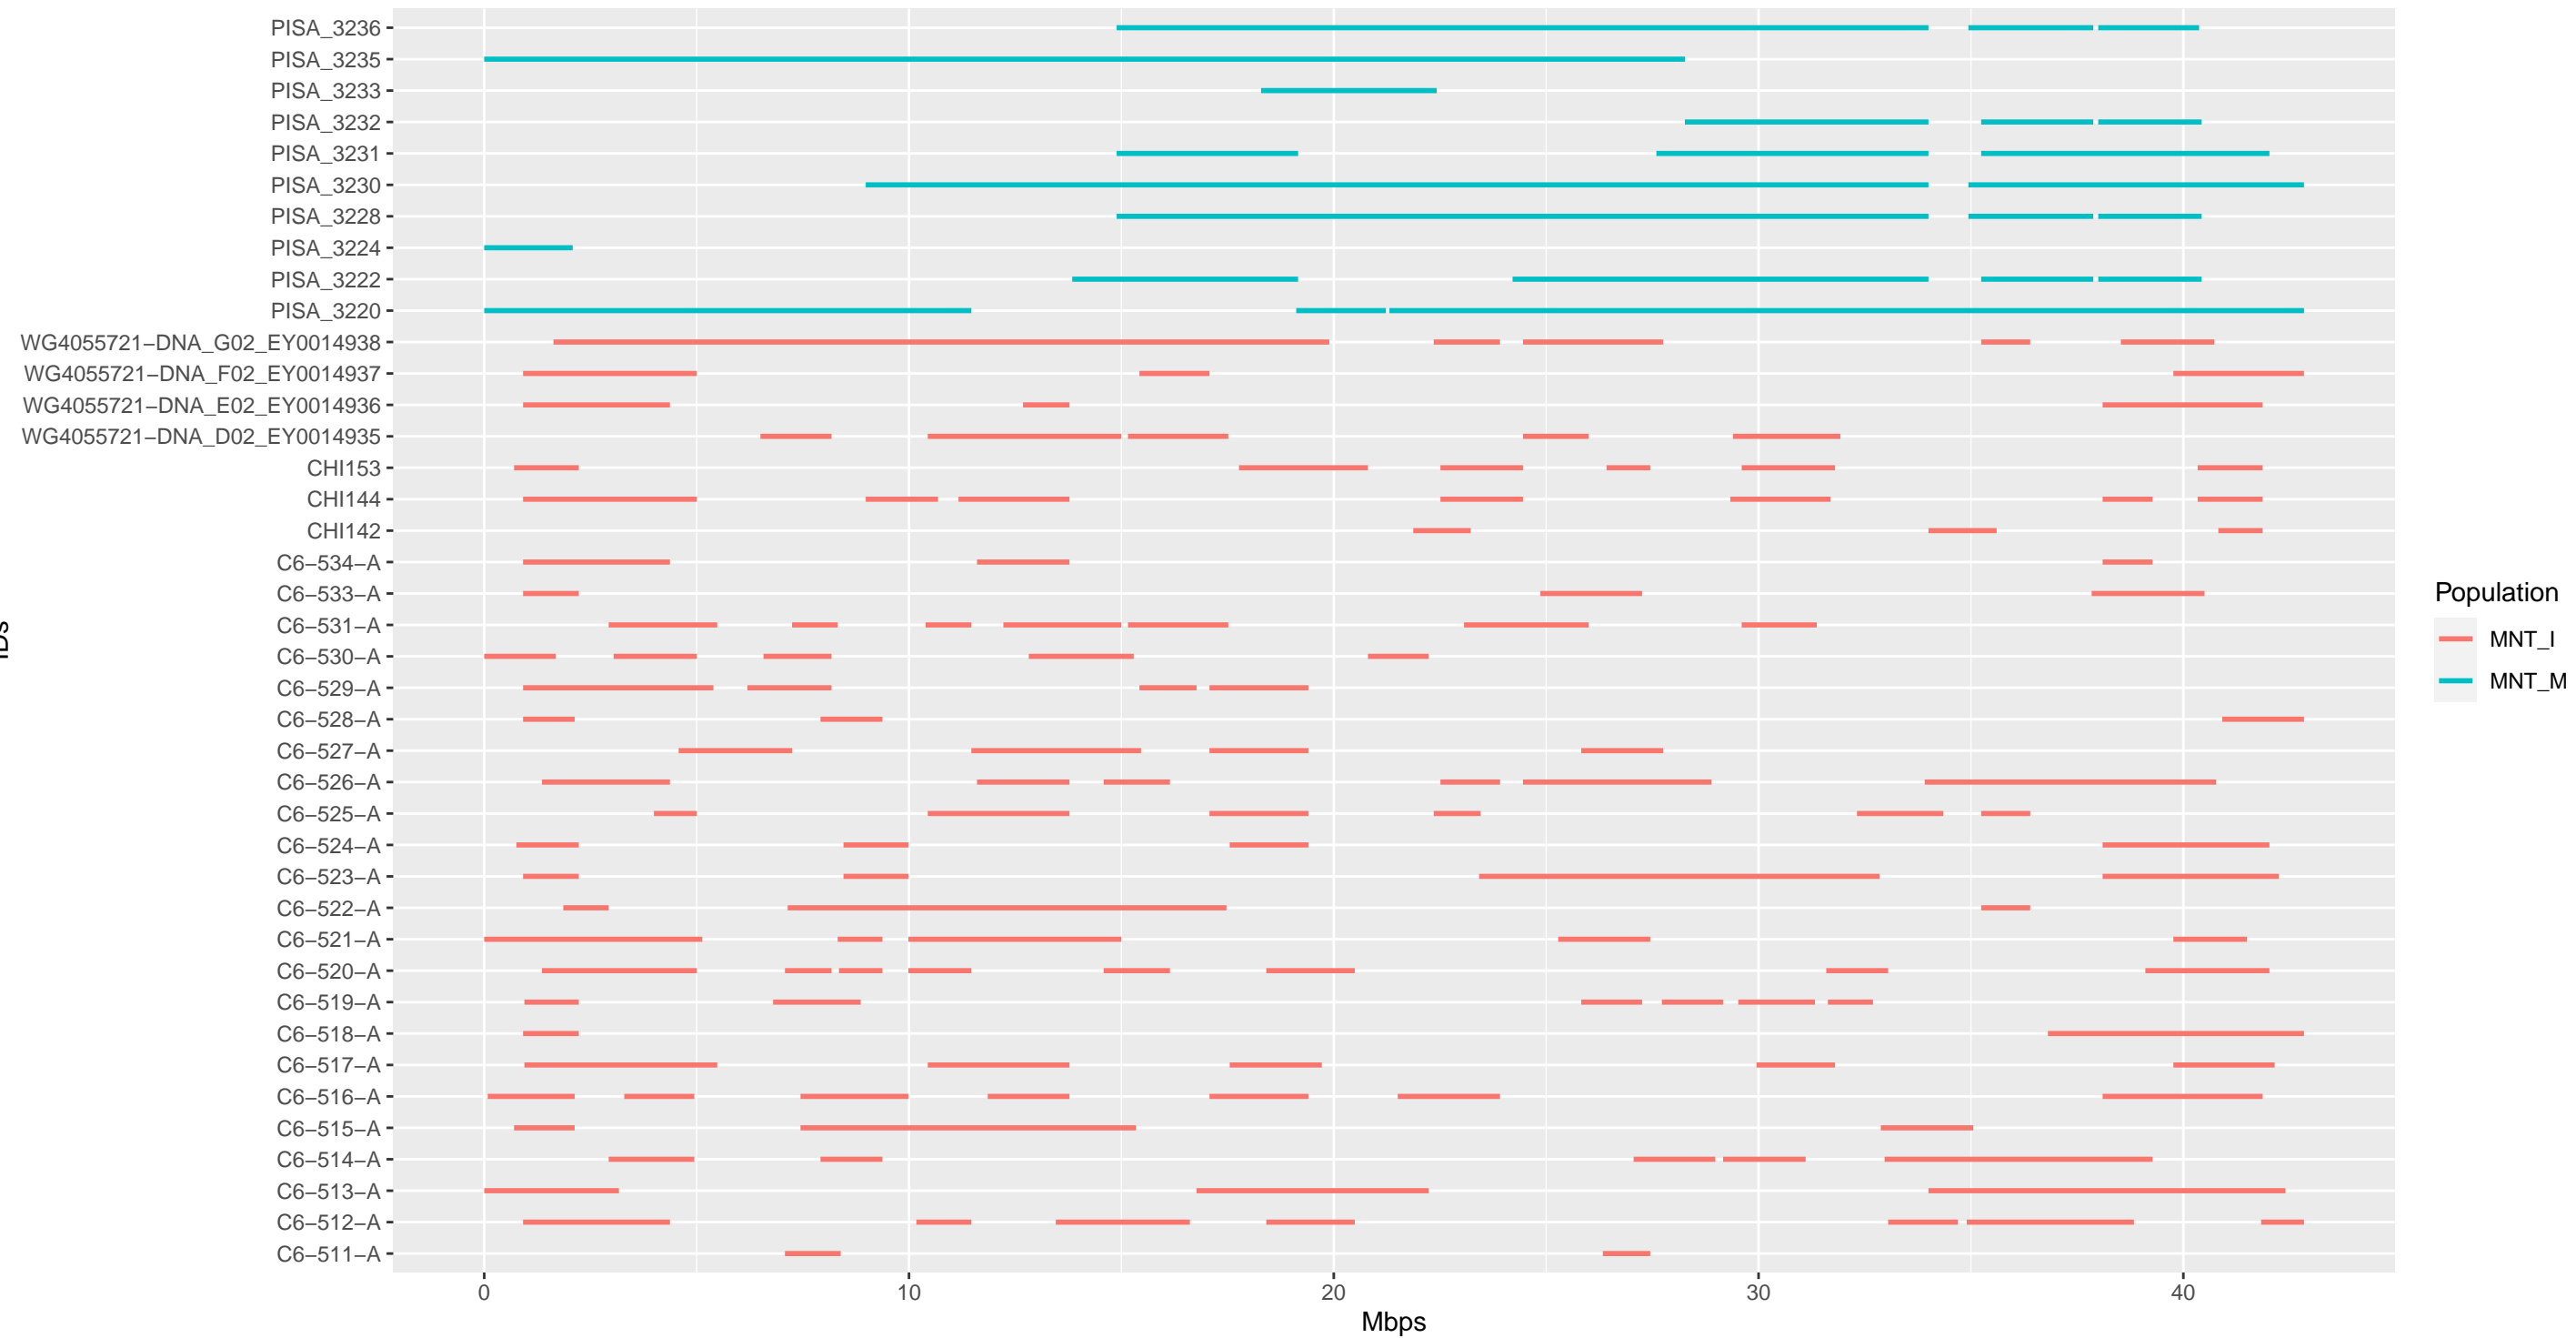

Chromosome 26

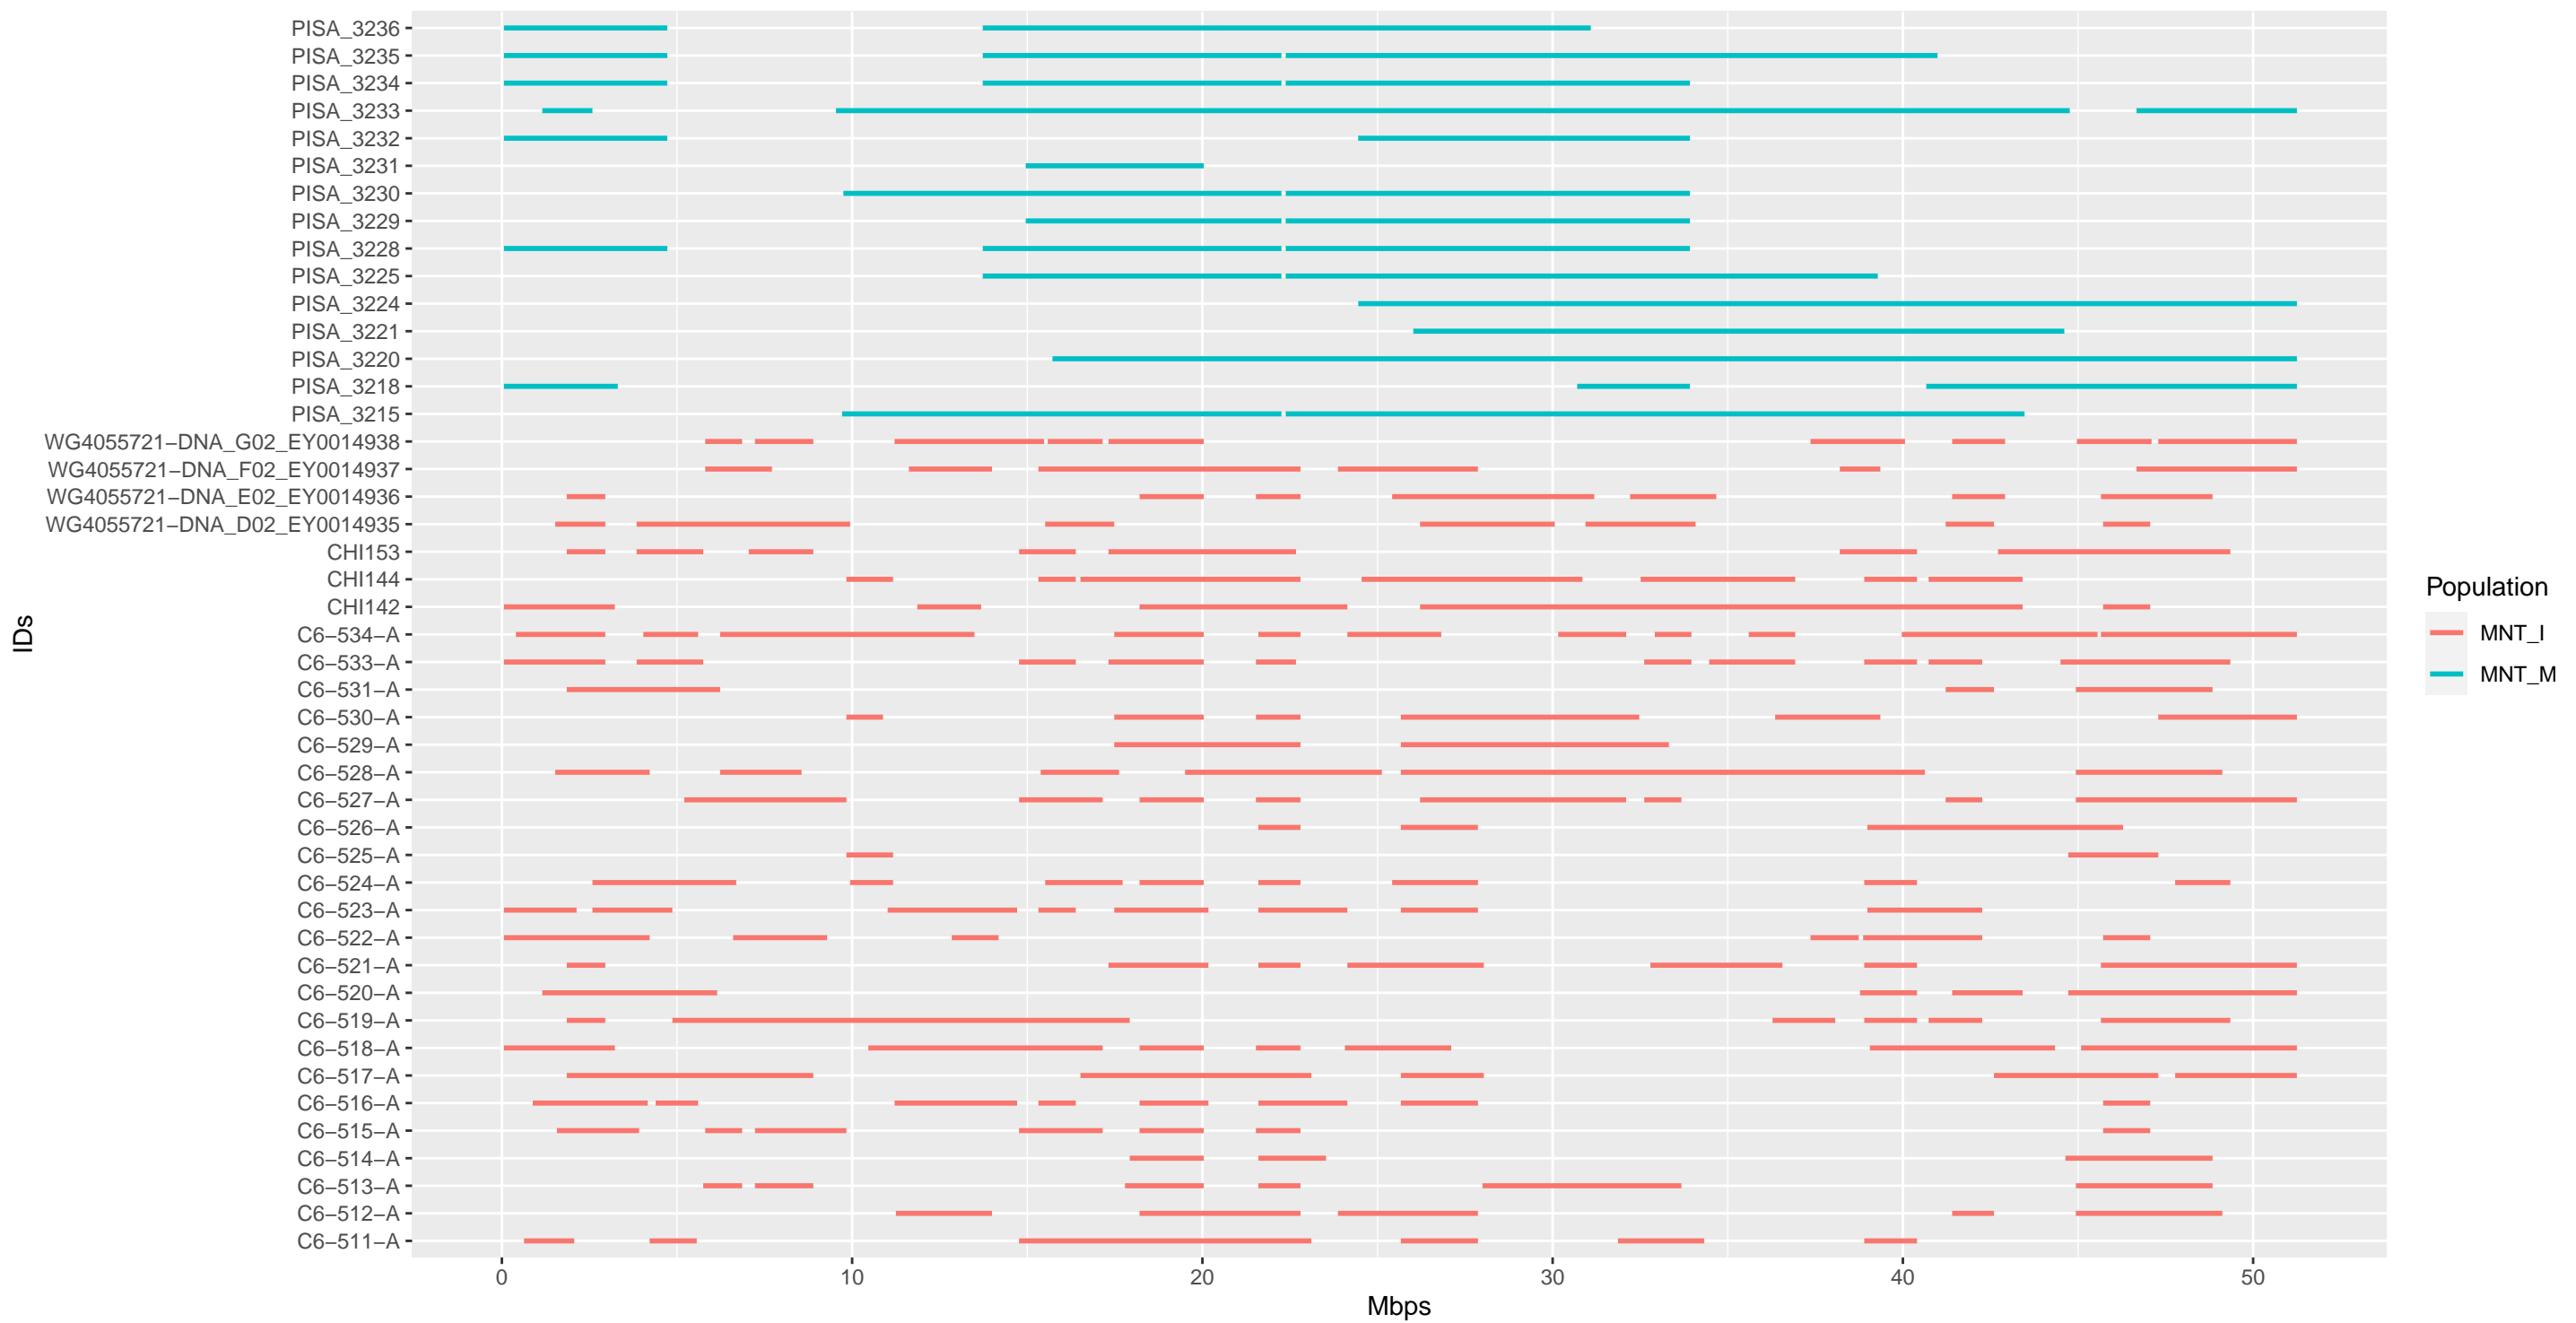

# Chromosome 27

IDs

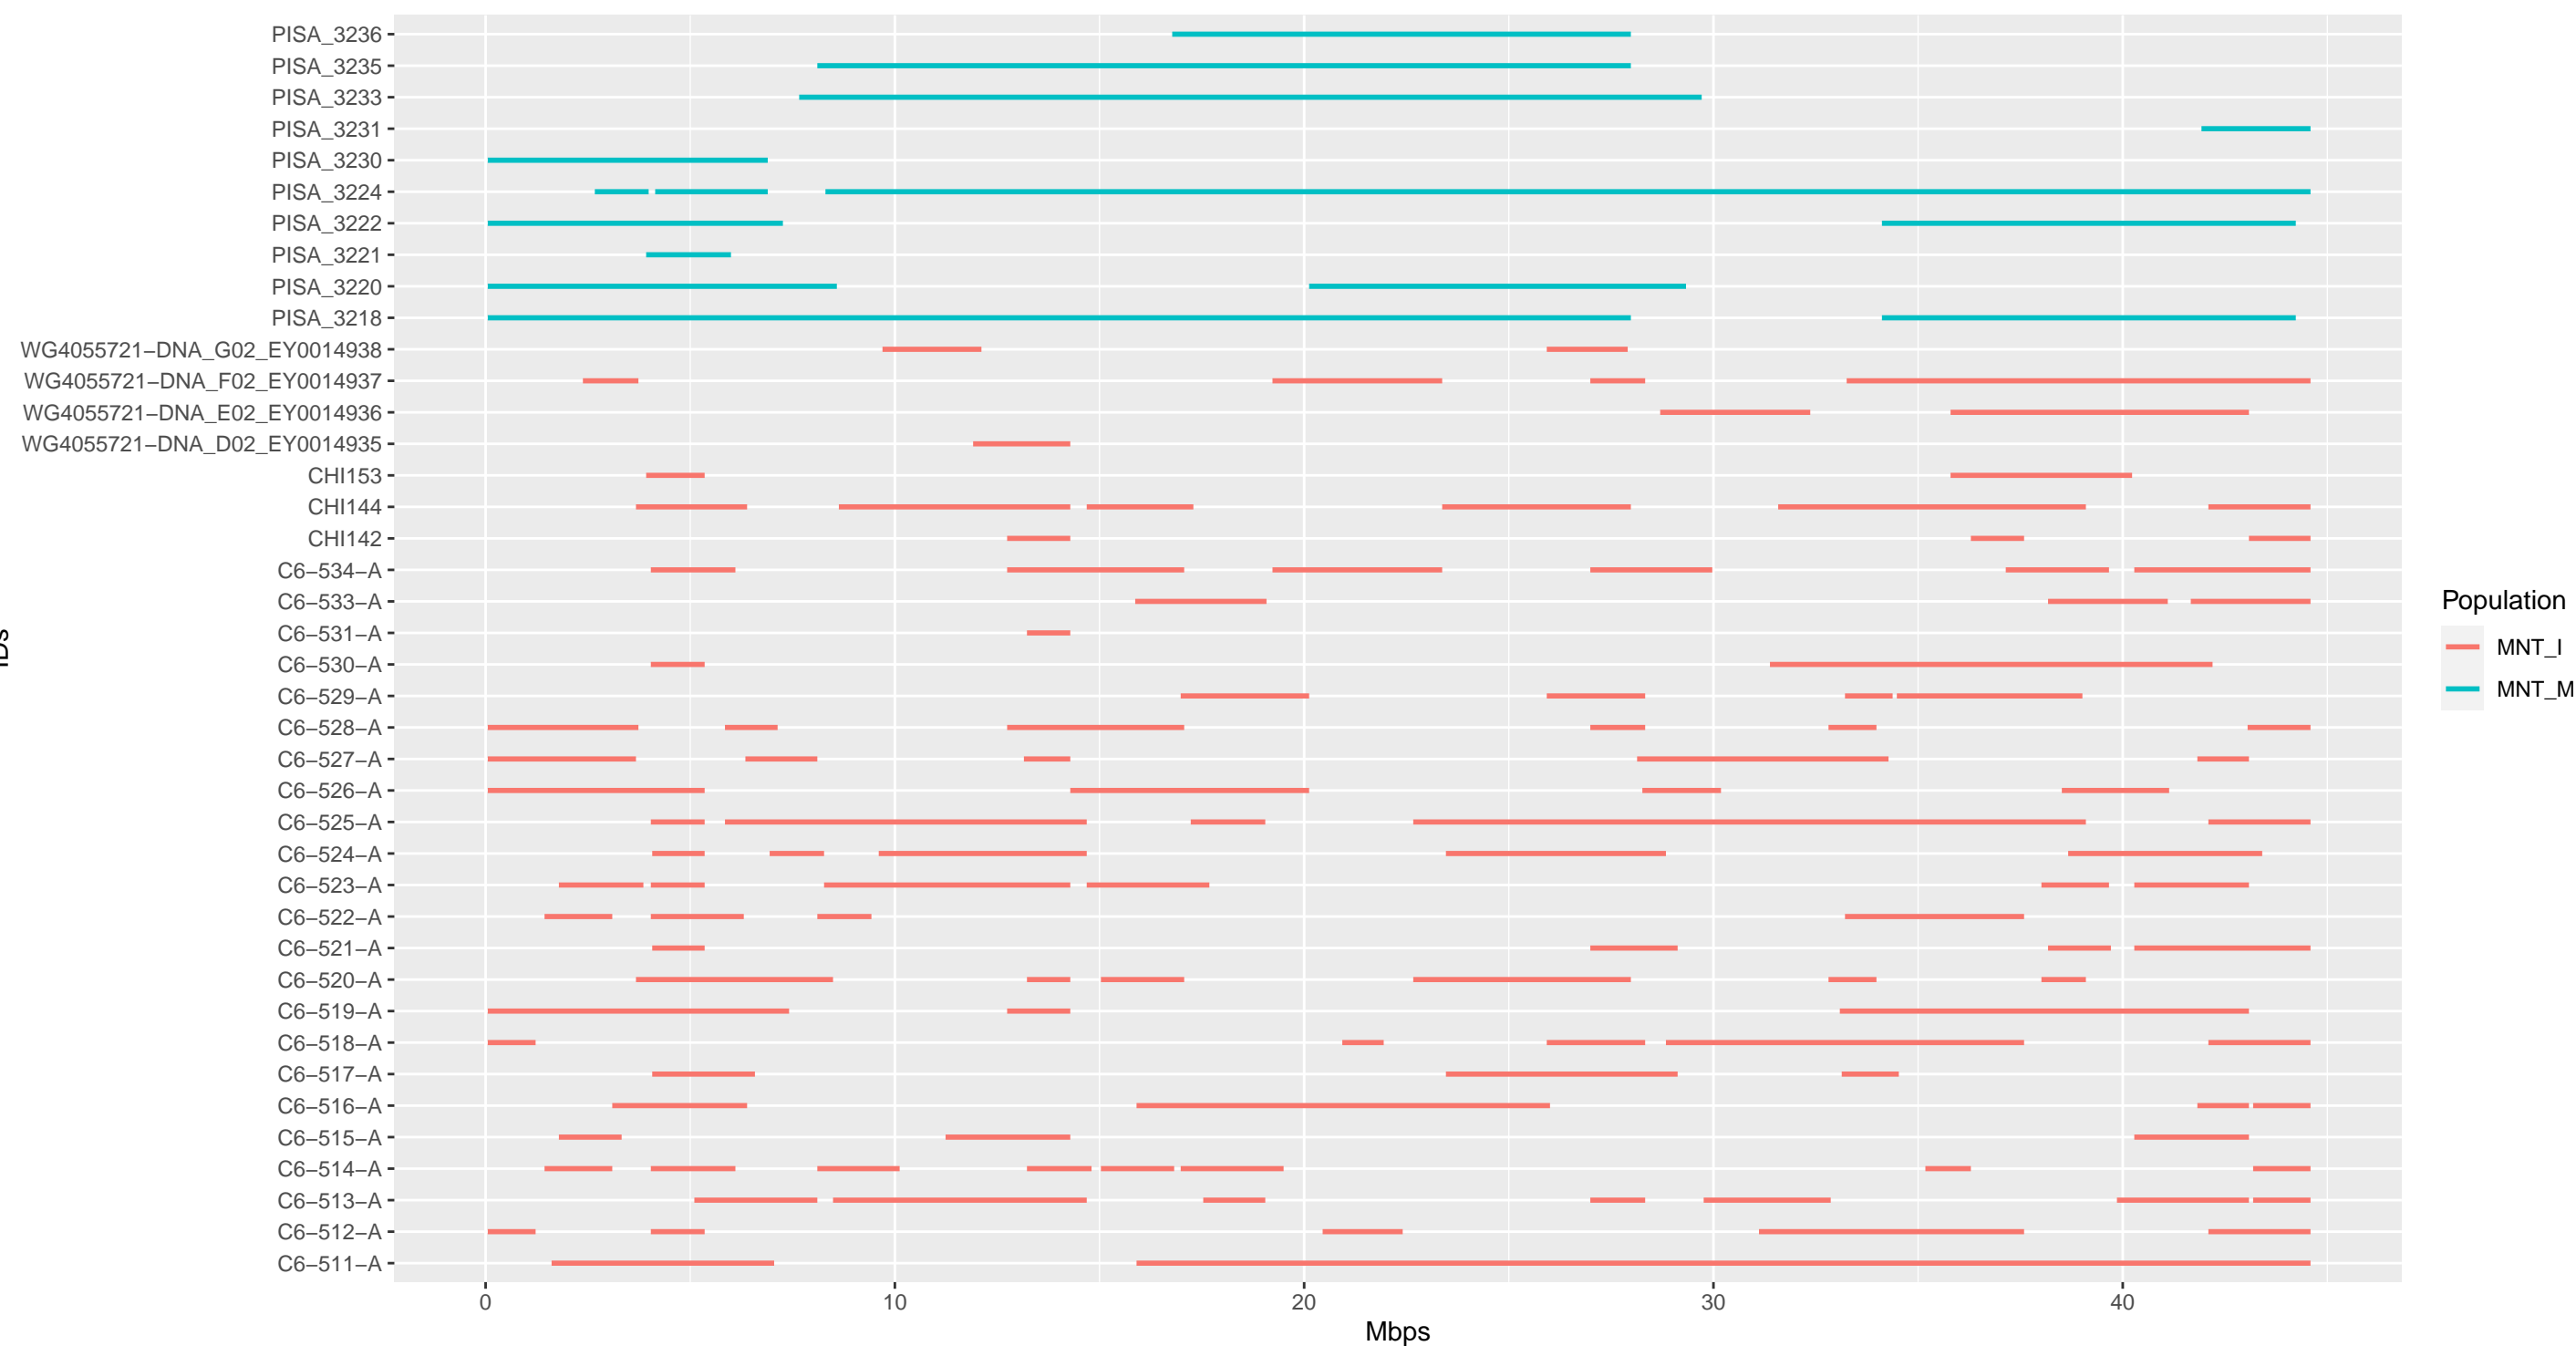

Mbps

Chromosome 28

IDs

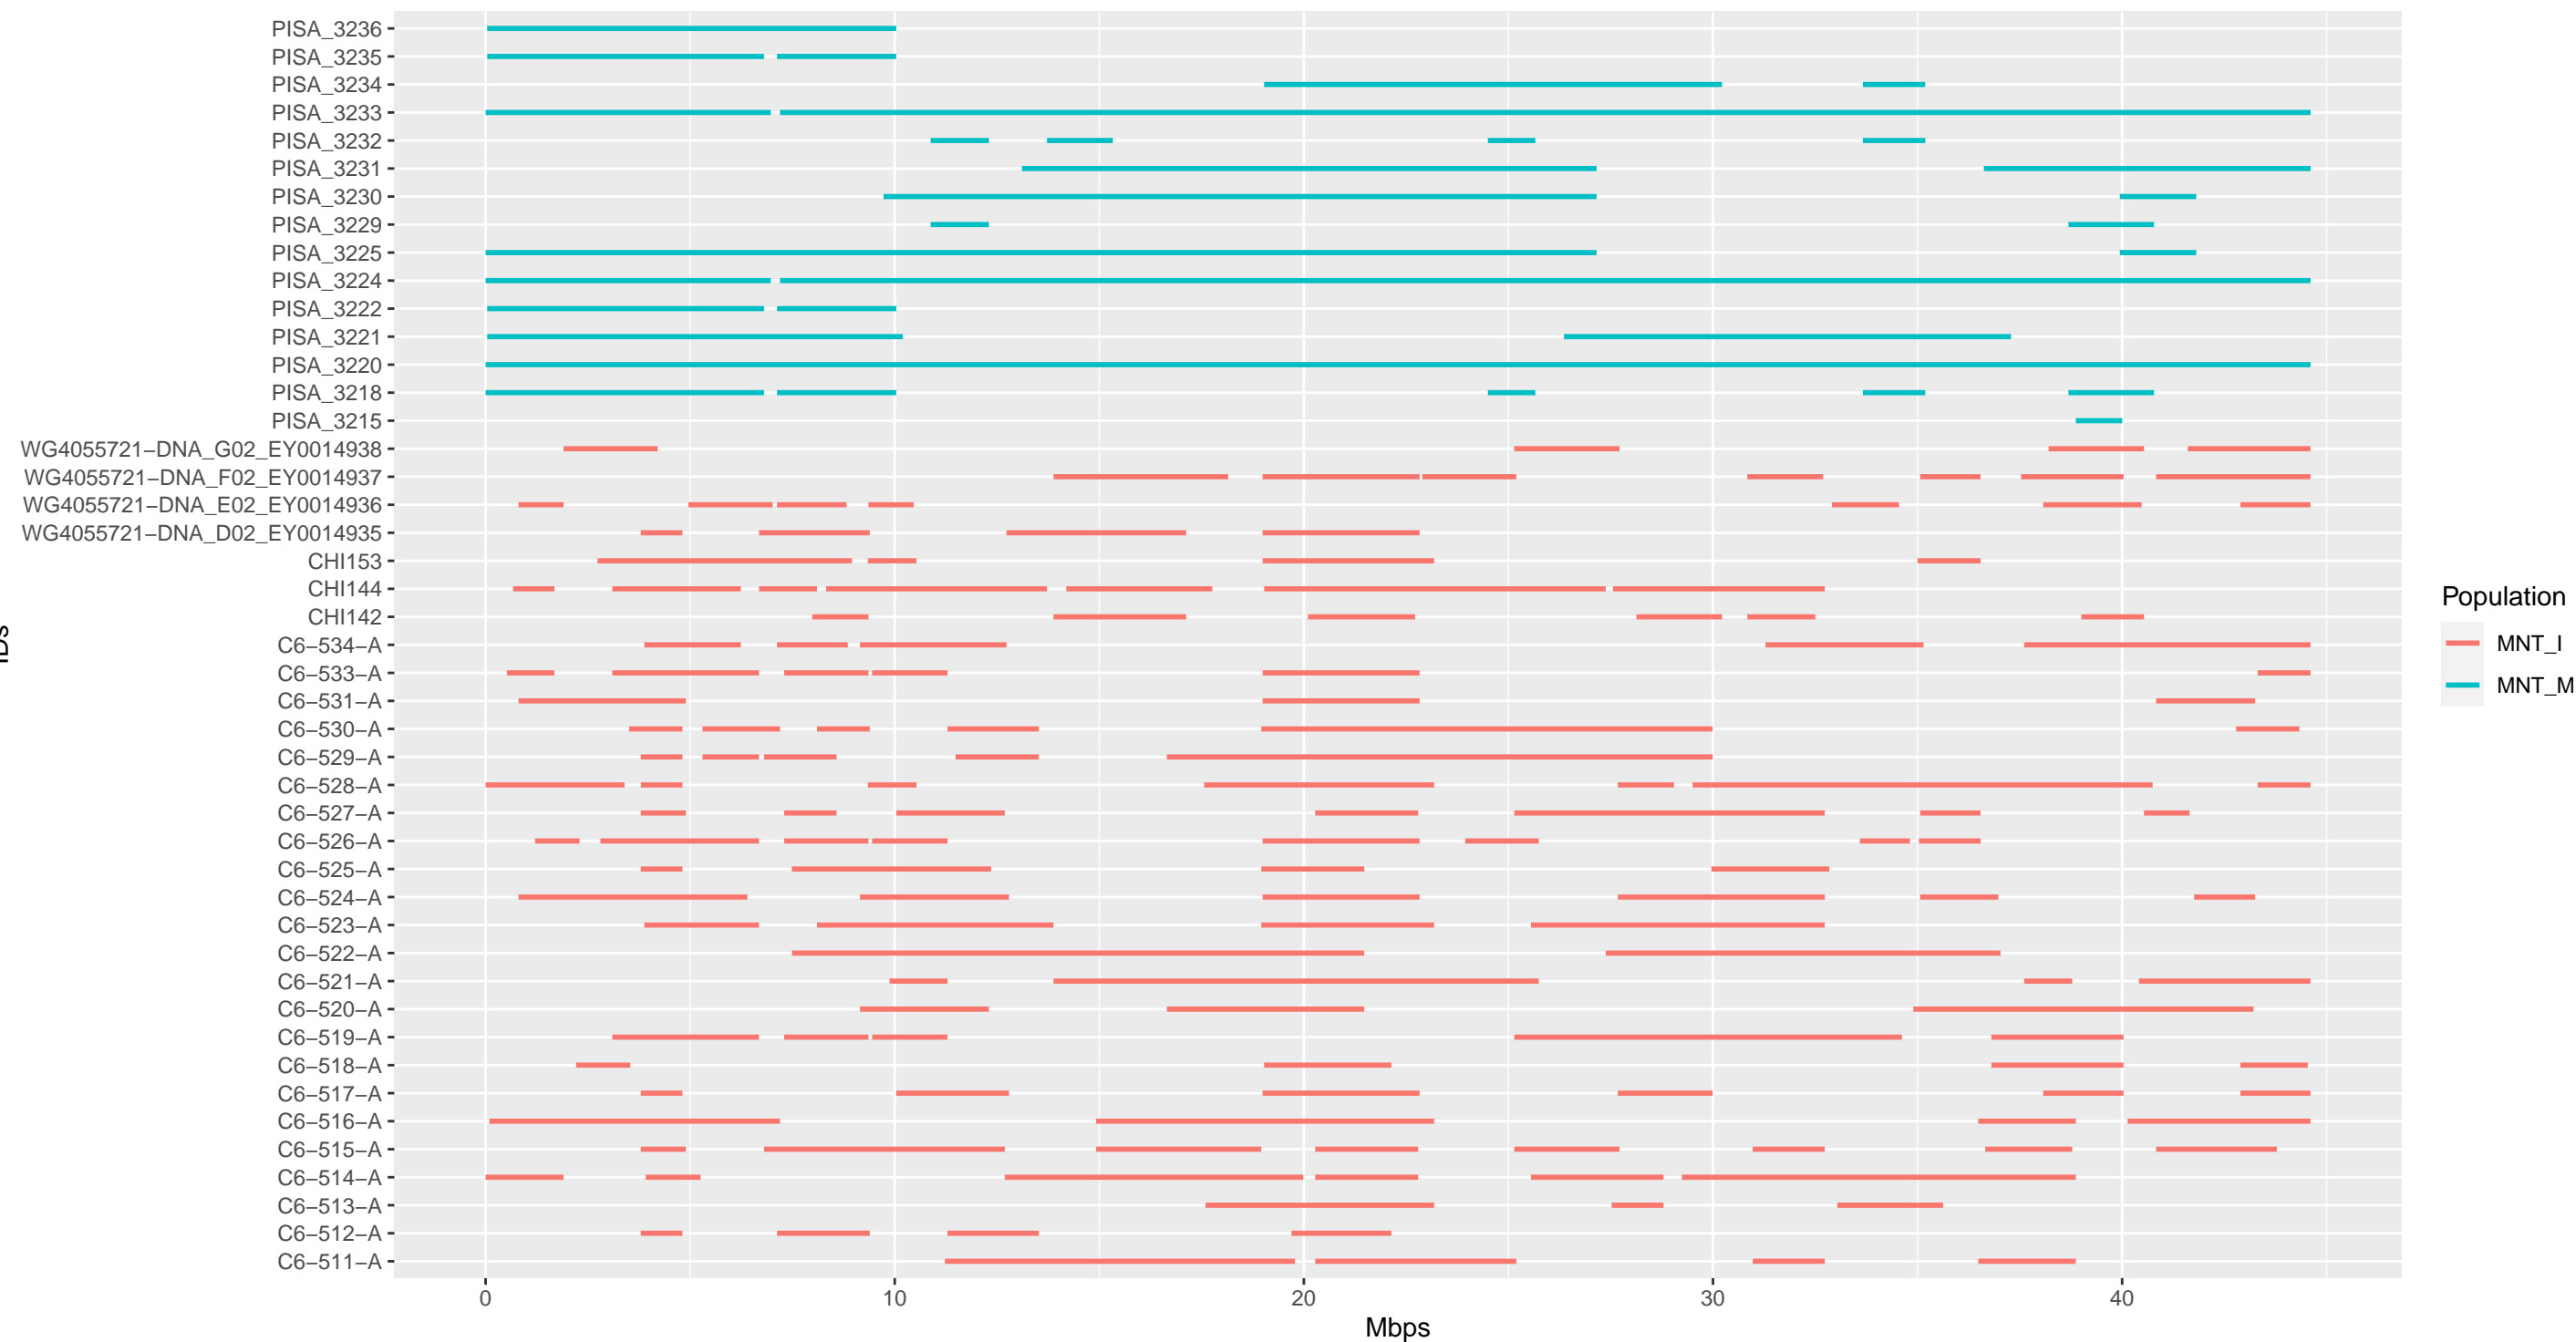

Chromosome 29

IDs

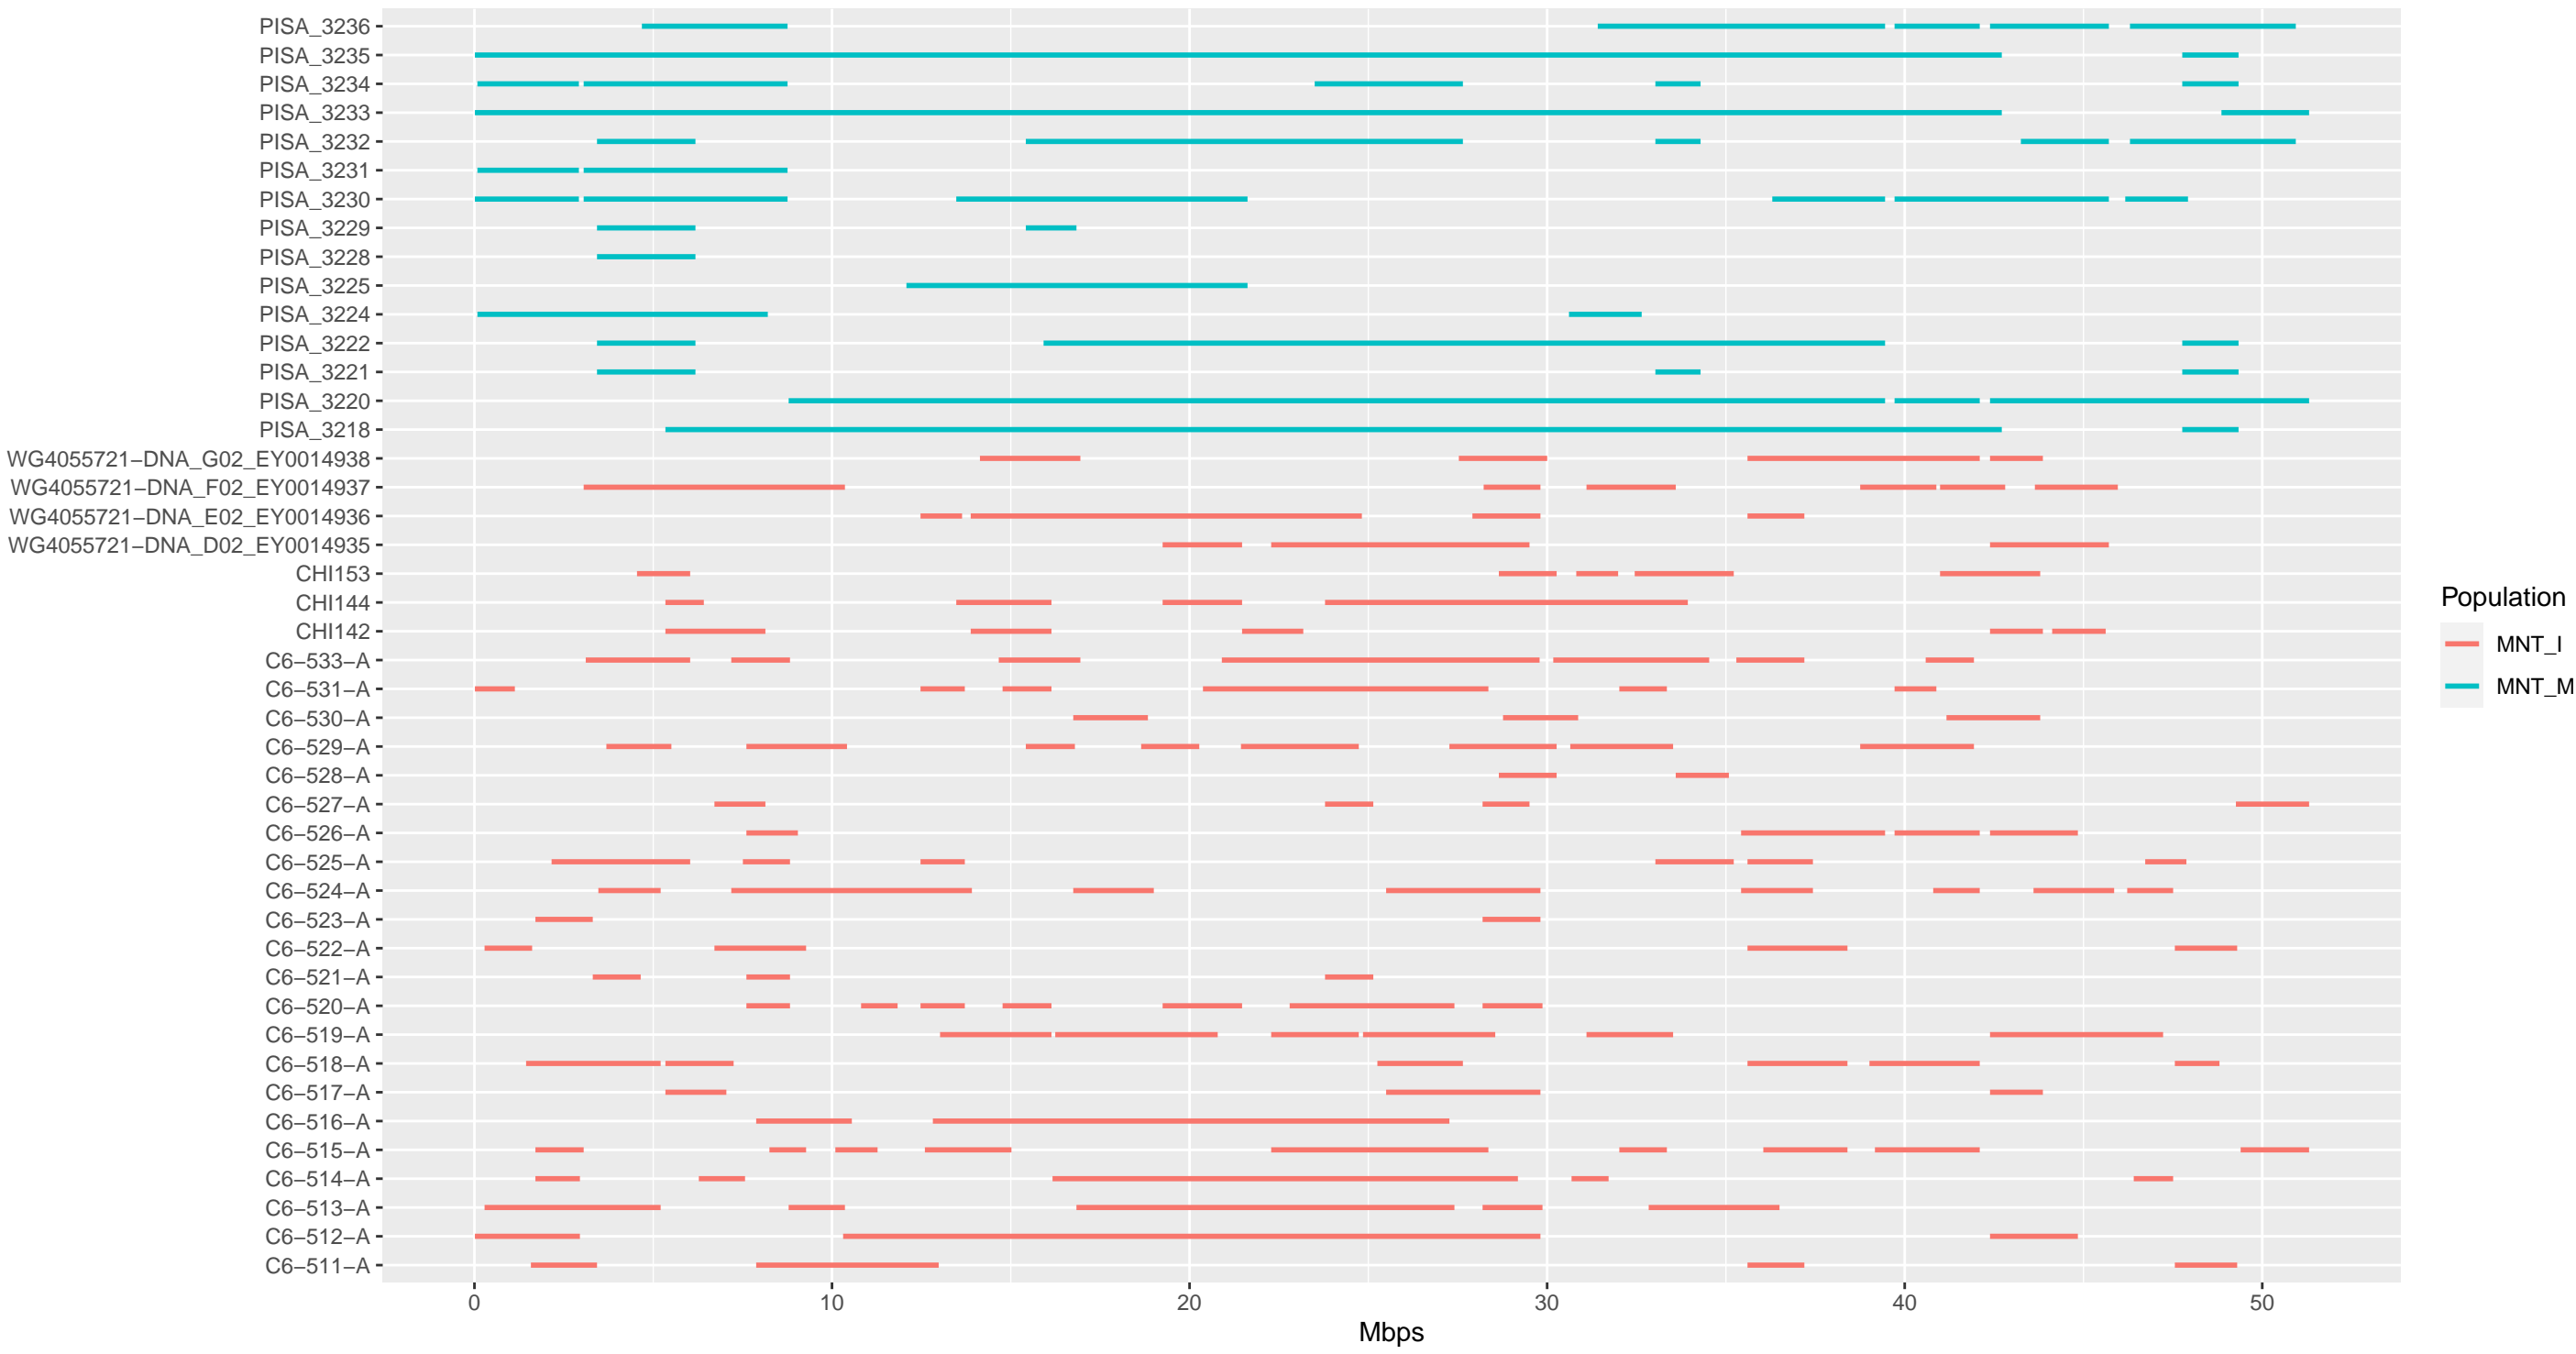

Supplement: s1 [file s1]
