# Supplementary material for: The SNP-Based Profiling of Montecristo Feral Goat Populations Reveals a History of Isolation, Bottlenecks, and the Effects of Management
Source: MDPI journal article supplement (doi:10.3390/genes13020213), 2022-01-24
Supplement: s1 [file s1]

| <i>Length category<br/>(Mb)</i> | MNT_M | MNT_I |
|---------------------------------|-------|-------|
| 0-2                             | 188   | 3209  |
| 2-4                             | 252   | 2408  |
| 4-8                             | 258   | 1155  |
| 8-16                            | 217   | 348   |
| >16                             | 213   | 71    |
| Tot.                            | 1128  | 7191  |
