# Supplementary material for: The SNP-Based Profiling of Montecristo Feral Goat Populations Reveals a History of Isolation, Bottlenecks, and the Effects of Management
Source: MDPI journal article supplement (doi:10.3390/genes13020213), 2022-01-24
Supplement: s1 [file s1]

| <b>Breed acronym</b> | <b>Breed name</b>        | <b>Country of Origin</b> | <b>Source Dataset</b> | <b>N of animals Raw dataset</b> | <b>N of animals Working Dataset</b> | <b>H<sub>O</sub></b> | <b>H<sub>E</sub></b> | <b>F<sub>IS</sub></b> |
|----------------------|--------------------------|--------------------------|-----------------------|---------------------------------|-------------------------------------|----------------------|----------------------|-----------------------|
| ALP_IT               | Alpine                   | Italy                    | AdaptMap              | 160                             | 30                                  | 0.399                | 0.405                | 0.025                 |
| ANK                  | Ankara                   | Turkey                   | AdaptMap              | 20                              | 20                                  | 0.398                | 0.397                | 0.006                 |
| ARG                  | Argentata dell'Etna      | Italy                    | IGC2                  | 48                              | 29                                  | 0.416                | 0.413                | 0.008                 |
| ASP                  | Capra dell'Aspromonte    | Italy                    | IGC2                  | 24                              | 24                                  | 0.402                | 0.406                | 0.026                 |
| BAR                  | Barcha                   | Morocco                  | AdaptMap              | 4                               | 4                                   | 0.391                | 0.395                | 0.038                 |
| BEY                  | Bermeya                  | Spain                    | AdaptMap              | 24                              | 24                                  | 0.404                | 0.397                | -0.006                |
| BEZ                  | Bezoar                   | Iran                     | AdaptMap              | 7                               | 7                                   | 0.281                | 0.376                | 0.233***              |
| BIA                  | Bianca Monticellana      | Italy                    | IGC2                  | 24                              | 24                                  | 0.393                | 0.403                | 0.041                 |
| BIO                  | Bionda dell'Adamello     | Italy                    | IGC2                  | 24                              | 24                                  | 0.404                | 0.405                | 0.017                 |
| BRK                  | Barki                    | Egypt                    | AdaptMap              | 153                             | 28                                  | 0.397                | 0.403                | 0.020                 |
| CAM                  | Camosciata               | Italy                    | IGC2                  | 143                             | 29                                  | 0.406                | 0.404                | 0.005                 |
| CAP                  | Capestrina               | Italy                    | IGC2                  | 24                              | 22                                  | 0.404                | 0.403                | 0.016                 |
| CRS                  | Corsa                    | France                   | AdaptMap              | 30                              | 29                                  | 0.401                | 0.404                | 0.020                 |
| DDS                  | Derivata di Siria        | Italy                    | IGGC2                 | 32                              | 30                                  | 0.382                | 0.402                | 0.060                 |
| DRA                  | Draa                     | Morocco                  | AdaptMap              | 4                               | 4                                   | 0.387                | 0.394                | 0.035                 |
| FAC                  | Facciuta della Valnerina | Italy                    | IGC2                  | 24                              | 23                                  | 0.395                | 0.410                | 0.055                 |
| FSS                  | Fosses                   | France                   | AdaptMap              | 26                              | 26                                  | 0.394                | 0.394                | 0.013                 |
| FUL                  | Fulva del Lazio          | Italy                    | IGC2                  | 22                              | 22                                  | 0.415                | 0.411                | 0.009                 |
| GAR                  | Garganica                | Italy                    | IGC2                  | 40                              | 27                                  | 0.403                | 0.403                | 0.011                 |
| GCI                  | Grigia Ciociara          | Italy                    | IGC2                  | 43                              | 30                                  | 0.405                | 0.409                | 0.023                 |
| GHA                  | Ghazalia                 | Morocco                  | AdaptMap              | 4                               | 4                                   | 0.386                | 0.395                | 0.044                 |
| GIR                  | Girgentana               | Italy                    | IGC2                  | 59                              | 30                                  | 0.357                | 0.371                | 0.025                 |
| GRF                  | Garfagnana               | Italy                    | IGC2                  | 28                              | 27                                  | 0.399                | 0.405                | 0.028                 |
| IRA                  | Iranian goat             | Iran                     | AdaptMap              | 9                               | 9                                   | 0.381                | 0.399                | 0.075                 |
| JON                  | Jonica                   | Italy                    | IGC2                  | 16                              | 11                                  | 0.417                | 0.388                | -0.083                |
| KIL                  | Kil                      | Turkey                   | AdaptMap              | 25                              | 25                                  | 0.404                | 0.401                | 0.003                 |
| KLS                  | Kilis                    | Turkey                   | AdaptMap              | 40                              | 30                                  | 0.401                | 0.400                | 0.006                 |
| LIV                  | Capra di Livo            | Italy                    | IGC2                  | 24                              | 22                                  | 0.407                | 0.402                | 0.003                 |
| MAL                  | Maltese                  | Italy                    | AdaptMap              | 16                              | 16                                  | 0.365                | 0.379                | 0.047                 |
| MES                  | Messinese                | Italy                    | IGC2                  | 24                              | 22                                  | 0.413                | 0.409                | 0.008                 |
| MLG                  | Malaguena                | Spain                    | AdaptMap              | 42                              | 30                                  | 0.417                | 0.412                | 0.000                 |
| MNT M                | Montecristo              | Italy                    | IGC2                  | 18                              | 17                                  | 0.325                | 0.377                | -0.086                |
| MNT I                | Montecristo              | Italy                    | IGC2                  | 32                              | 30                                  | 0.272                | 0.347                | -0.007                |
| MON                  | Capra di Montefalcone    | Italy                    | IGC2                  | 24                              | 23                                  | 0.403                | 0.408                | 0.029                 |
| MOR                  | Moroccan goat            | Morocco                  | AdaptMap              | 10                              | 10                                  | 0.380                | 0.396                | 0.068                 |
| MUG                  | Murciano-granadina       | Spain                    | AdaptMap              | 20                              | 20                                  | 0.402                | 0.397                | 0.001                 |
| NDA                  | Noire de l'Atlas         | Morocco                  | AdaptMap              | 4                               | 4                                   | 0.384                | 0.396                | 0.055                 |
| NIC                  | Nicastrse                | Italy                    | IGC2                  | 24                              | 24                                  | 0.396                | 0.408                | 0.045                 |
| NOR                  | Nord                     | Morocco                  | AdaptMap              | 4                               | 4                                   | 0.394                | 0.398                | 0.059                 |
| NVE                  | Nera di Verzasca         | Italy                    | IGC2                  | 19                              | 18                                  | 0.395                | 0.394                | 0.003                 |

|      |                            |         |          |      |      |       |       |        |
|------|----------------------------|---------|----------|------|------|-------|-------|--------|
| ORO  | Orobica                    | Italy   | IGC2     | 23   | 23   | 0.360 | 0.364 | 0.004  |
| OSS  | Oasis                      | Egypt   | AdaptMap | 72   | 30   | 0.373 | 0.395 | 0.056  |
| PTV  | Poitevine                  | France  | AdaptMap | 29   | 27   | 0.375 | 0.381 | 0.014  |
| PVC  | Provencale                 | France  | AdaptMap | 18   | 18   | 0.409 | 0.397 | -0.015 |
| PYR  | Pyrenean                   | France  | AdaptMap | 27   | 27   | 0.374 | 0.388 | 0.041  |
| RAS  | Blanca de Rasquera         | Spain   | AdaptMap | 20   | 20   | 0.378 | 0.388 | 0.036  |
| RCC  | Roccaverano                | Italy   | IGC2     | 28   | 28   | 0.401 | 0.416 | 0.052  |
| RME  | Rossa Mediterranea         | Italy   | IGC2     | 46   | 21   | 0.410 | 0.396 | -0.038 |
| SAA  | Saanen                     | Italy   | IGC2     | 44   | 30   | 0.416 | 0.410 | -0.001 |
| SAM  | Maltese Sampled in Sardina | Italy   | IGC2     | 15   | 14   | 0.375 | 0.371 | -0.010 |
| SAR  | Sarda                      | Italy   | IGC2     | 33   | 27   | 0.403 | 0.409 | 0.0261 |
| SID  | Saidi                      | Egypt   | AdaptMap | 60   | 30   | 0.384 | 0.400 | 0.044  |
| TER  | Capra di Teramo            | Italy   | IGC2     | 43   | 30   | 0.385 | 0.377 | -0.016 |
| TUN  | Tunisian                   | Tunisia | AdapMap  | 23   | 23   | 0.401 | 0.401 | 0.015  |
| VAL  | Valdostana                 | Italy   | IGC2     | 24   | 24   | 0.371 | 0.384 | 0.039  |
| VLS  | Vallesana                  | Italy   | IGC2     | 24   | 23   | 0.348 | 0.370 | 0.051  |
| VPS  | Capra della Valpassiria    | Italy   | IGC2     | 24   | 24   | 0.402 | 0.407 | 0.030  |
| TOT. |                            |         |          | 1871 | 1251 | 0.399 | 0.396 | 0.025  |
