# Supplementary material for: The SNP-Based Profiling of Montecristo Feral Goat Populations Reveals a History of Isolation, Bottlenecks, and the Effects of Management
Source: MDPI journal article supplement (doi:10.3390/genes13020213), 2022-01-24
Supplement: s1 [file s1]

| Run | Population | Chr | Start (bp) | End (bp)  | genes                                                                                                                                                                                                       |
|-----|------------|-----|------------|-----------|-------------------------------------------------------------------------------------------------------------------------------------------------------------------------------------------------------------|
| ROH | MNT_I      | 1   | 38552149   | 39474884  | -                                                                                                                                                                                                           |
| ROH | MNT_I      | 2   | 30528787   | 31463338  | ENSCHIG000000006284, ENSCHIG000000006293,<br>ENSCHIG000000006309, TNP1,<br>SMARCAL1, MARCHF4                                                                                                                |
| ROH | MNT_I      | 3   | 38397951   | 38432723  | -                                                                                                                                                                                                           |
| ROH | MNT_I      | 3   | 52713763   | 55922240  | ST6GALNAC5                                                                                                                                                                                                  |
| ROH | MNT_I      | 11  | 96495649   | 96534269  | ENSCHIG000000004988                                                                                                                                                                                         |
| ROH | MNT_M      | 16  | 13996242   | 20982479  | ENSCHIG000000000862, ENSCHIG000000000869,<br>ENSCHIG000000000876,<br>ENSCHIG000000000880,<br>ENSCHIG000000000882, 5S_rRNA, RRP15,<br>KCTD3, BRINP3, GPATCH2, ESRRG,<br>ENSCHIG0000000021102, TGFB2, SPATA17 |
| HRR | MNT_I      | 6   | 23704450   | 24651938  | PPP3CA, EMCN                                                                                                                                                                                                |
| HRR | MNT_I      | 6   | 92891918   | 93001162  | CNOT6L                                                                                                                                                                                                      |
| HRR | MNT_I      | 13  | 47213471   | 47526560  | SHLD1, GPCPD1                                                                                                                                                                                               |
| HRR | MNT_M      | 1   | 105425339  | 105469270 | OTOL1                                                                                                                                                                                                       |
| HRR | MNT_M      | 2   | 89186937   | 89310361  | LYPD6B                                                                                                                                                                                                      |
| HRR | MNT_M      | 2   | 89822439   | 89891526  | ENSCHIG000000000666                                                                                                                                                                                         |
| HRR | MNT_M      | 8   | 29737003   | 29990995  | NFIB                                                                                                                                                                                                        |
| HRR | MNT_M      | 8   | 69147795   | 69192956  | BMP1                                                                                                                                                                                                        |
| HRR | MNT_M      | 13  | 27167011   | 27654015  | ENSCHIG000000000499, OPTN, BEND7, MCM10,<br>PHYH                                                                                                                                                            |
| HRR | MNT_M      | 14  | 71387238   | 72223053  | ASAP1, ADCY8                                                                                                                                                                                                |
| HRR | MNT_M      | 16  | 69226610   | 69455422  | TATDN3, RPS6KC1, ANGEL2, NSL1                                                                                                                                                                               |
| HRR | MNT_M      | 18  | 43777759   | 43932769  | ENSCHIG000000004436, ENSCHIG000000004439                                                                                                                                                                    |
| HRR | MNT_M      | 22  | 44176757   | 44243832  | ENSCHIG000000015055                                                                                                                                                                                         |
| HRR | MNT_M      | 24  | 46431005   | 46854646  | LOXHD1, KATNAL2, ST8SIA5, PIAS2                                                                                                                                                                             |
| HRR | MNT_M      | 24  | 47100548   | 47587014  | ENSCHIG000000002761, ENSCHIG000000002755,<br>SKOR2                                                                                                                                                          |
| HRR | MNT_M      | 24  | 50751818   | 50783212  | SMAD4                                                                                                                                                                                                       |
