# Supplementary material for: The SNP-Based Profiling of Montecristo Feral Goat Populations Reveals a History of Isolation, Bottlenecks, and the Effects of Management
Source: Genes (Basel). 2022 Jan 24;13(2):213. doi: 10.3390/genes13020213 (PMC8872249; doi:10.3390/genes13020213)
Supplement: Supplementary file 1 [file genes-13-00213-s001.zip]

Archive with 11 entries (11 files):
- SFigure1.pdf
- SFigure2.pdf
- SFigure3.pdf
- SFigure4.pdf
- SFigure5.pdf
- SFigure6.pdf
- STable1.pdf
- STable2.pdf
- STable3.pdf
- Supplementary_Captions.pdf
- Supplementary_File1.pdf
